# Supplementary material for: E4F1 and ZNF148 are transcriptional activators of the −57A > C and wild-type TERT promoter
Source: Genome Res. 2023 Nov;33(11):1893–905. doi: 10.1101/gr.277724.123 (PMC10760450; doi:10.1101/gr.277724.123)
Supplement: Supplement 3 [file Supplemental_Table_S3.xlsx]

## Sheet: Table S3 (-124C>T)
Table S3. MS data for SILAC-based in-vitro DNA reconstitution pull-downs using U87MG nuclear extract with -124C>T vs. WT TERT promoter probes
Protein names	Gene names	Number of proteins	Peptides	Unique peptides	Peptides for	Peptides rev	Unique peptides for	Unique peptides rev	Sequence coverage [%]	Mol. weight [kDa]	Sequence length	Ratio H/L for	Ratio H/L normalized for	Ratio H/L rev	Ratio H/L normalized rev	Intensity	Intensity L for	Intensity H for	Intensity L rev	Intensity H rev
ETS-related transcription factor Elf-1	ELF1	2	12	12	9	10	9	10	34.3	64.928	595	7.9148	10.001	0.14161	0.18578	643520000	29809000	226300000	375050000	12368000
Guanine nucleotide-binding protein-like 3-like protein	GNL3L	2	7	7	5	6	5	6	14.3	65.433	581	6.308	7.8115	0.94968	1.1456	17607000000	509920000	9692900000	481390000	6923200000
Sphingosine-1-phosphate lyase 1	SGPL1	2	12	12	11	10	11	10	23.2	63.523	568	3.8921	4.6047	3.4329	4.1666	1025600000	124220000	400190000	118890000	382290000
Heat shock protein beta-1	HSPB1	3	2	2	2	2	2	2	14	20.406	186	2.9919	3.9433	2.0746	2.5943	222430000	33566000	73503000	42472000	72893000
Bifunctional polynucleotide phosphatase/kinase;Polynucleotide 3-phosphatase;Polynucleotide 5-hydroxyl-kinase	PNKP	1	5	5	3	3	3	3	13.1	57.076	521	2.6351	3.4526	0.76424	1.003	215100000	23292000	150990000	24193000	16627000
Transcription initiation factor TFIID subunit 12	TAF12	2	2	2	2	2	2	2	14.5	14.825	131	2.4705	3.1661	0.41509	0.52021	264300000	45657000	111890000	76367000	30385000
Transcription initiation factor TFIID subunit 5	TAF5	2	13	13	11	11	11	11	21.1	86.829	800	2.151	2.8109	0.45044	0.62094	1285200000	225360000	434680000	427250000	197870000
Transcription initiation factor TFIID subunit 4	TAF4	4	19	19	17	18	17	18	24.1	110.11	1085	2.1447	2.8048	0.46826	0.59919	2684600000	472200000	894890000	881070000	436400000
Serrate RNA effector molecule homolog	SRRT	6	3	3	2	2	2	2	3.8	96.221	839	2.178	2.733	0.82928	1.0734	146560000	16284000	32576000	43499000	54203000
Transcription initiation factor TFIID subunit 8	TAF8	5	7	7	4	6	4	6	27.4	34.262	310	2.1931	2.6746	0.39774	0.53259	314010000	45705000	100260000	112520000	55532000
Transcription initiation factor TFIID subunit 1;Transcription initiation factor TFIID subunit 1-like	TAF1;TAF1L	10	19	19	14	13	14	13	12.3	212.67	1872	1.9497	2.6259	0.45929	0.65067	860410000	111100000	250400000	331560000	167350000
Transcription initiation factor TFIID subunit 7	TAF7	1	6	6	6	3	6	3	20.9	40.259	349	2.0397	2.565	0.46952	0.63704	409200000	79510000	167570000	105140000	56979000
Nuclear cap-binding protein subunit 1	NCBP1	1	5	5	3	5	3	5	6.6	91.838	790	2.0132	2.4811	0.55733	0.6761	166870000	24192000	42140000	68918000	31625000
Transcription initiation factor TFIID subunit 6	TAF6	12	21	21	16	18	16	18	39.4	72.668	677	1.8865	2.4769	0.46702	0.60735	3317500000	530980000	944150000	1235800000	606610000
Cyclin-dependent kinase 11A;Cyclin-dependent kinase 11B	CDK11A;CDK11B	17	3	3	2	3	2	3	6.2	50.355	420	1.7409	2.2381	2.2032	2.6937	295630000	40410000	70477000	56196000	128540000
Small nuclear ribonucleoprotein Sm D2	SNRPD2	1	2	2	2	2	2	2	16.1	13.527	118	1.6238	2.0774	0.68544	0.91472	185970000	34978000	54379000	59716000	36900000
Malate dehydrogenase, mitochondrial;Malate dehydrogenase	MDH2	3	3	3	2	3	2	3	13.6	35.503	338	1.5985	2.0223	1.5871	1.9796	97709000	13360000	37839000	20339000	26171000
Polyadenylate-binding protein 1;Polyadenylate-binding protein 4	PABPC1;PABPC4	29	5	5	4	5	4	5	10.4	67.138	604	1.5854	1.9942	0.58926	0.7368	180660000	31289000	43531000	62672000	43171000
Splicing factor U2AF 35 kDa subunit	U2AF1	7	8	8	5	7	5	7	41.2	27.872	240	1.4707	1.9398	0.31144	0.39449	551830000	70531000	139700000	249980000	91621000
Heat shock protein HSP 90-beta	HSP90AB1	10	19	10	19	15	10	8	30.1	83.263	724	1.5417	1.9389	1.4284	1.9851	2825800000	760210000	909780000	482740000	673020000
Pre-mRNA-processing-splicing factor 8	PRPF8	2	45	45	34	40	34	40	24	273.6	2335	1.4395	1.9116	0.51012	0.69957	4136300000	768580000	1107900000	1516700000	743190000
Transcription initiation factor TFIID subunit 9	TAF9;AK6	6	11	7	5	10	4	6	43.9	28.974	264	1.4815	1.8852	0.45744	0.59576	814620000	58385000	148530000	408970000	198740000
Splicing factor U2AF 65 kDa subunit	U2AF2	2	12	12	10	9	10	9	43.3	53.12	471	1.5291	1.8755	0.26434	0.32549	1822400000	291760000	535850000	787470000	207290000
Acidic fibroblast growth factor intracellular-binding protein	FIBP	5	7	7	5	7	5	7	25.8	41.21	357	1.4025	1.8705	0.42065	0.55927	418060000	70495000	83101000	172400000	92064000
U4/U6.U5 tri-snRNP-associated protein 2	USP39	7	12	12	10	11	10	11	27.4	65.38	565	1.4828	1.8532	0.47202	0.58171	761860000	166130000	278710000	204830000	112190000
Bcl-2-associated transcription factor 1	BCLAF1	9	3	3	1	3	1	3	5.2	83.231	726	1.4986	1.8437	0.95073	1.1958	202350000	33223000	42255000	71822000	55052000
U5 small nuclear ribonucleoprotein 200 kDa helicase	SNRNP200	7	61	61	52	55	52	55	37.4	244.5	2136	1.4128	1.8216	0.53594	0.74819	6261300000	1214500000	1631000000	2249600000	1166200000
Heat shock protein HSP 90-alpha	HSP90AA1	6	16	10	15	13	9	8	25.4	84.659	732	1.4013	1.8202	1.4136	1.9023	687470000	130550000	184000000	129020000	243910000
U5 small nuclear ribonucleoprotein 40 kDa protein	SNRNP40	3	12	12	8	9	8	9	40.1	39.31	357	1.4354	1.8166	0.52053	0.68478	632700000	125040000	155110000	265480000	87075000
Pre-mRNA-processing factor 6	PRPF6	2	25	25	22	20	22	20	28.6	106.92	941	1.3702	1.7877	0.49997	0.69418	2116200000	466300000	663160000	634260000	352500000
Probable ATP-dependent RNA helicase DDX23	DDX23	3	18	18	17	15	17	15	25.7	95.581	820	1.3528	1.754	0.59282	0.81655	2799700000	543340000	790000000	891990000	574420000
UAP56-interacting factor	FYTTD1	3	1	1	1	1	1	1	8.5	14.524	129	1.356	1.7267	0.67656	0.87673	46540000	11838000	16274000	10725000	7703000
116 kDa U5 small nuclear ribonucleoprotein component	EFTUD2	2	30	29	24	28	23	28	43.3	105.38	937	1.3885	1.7152	0.4947	0.69337	3970100000	709610000	1062100000	1430800000	767600000
Fructose-bisphosphate aldolase A	ALDOA	7	11	11	10	7	10	7	32.4	39.42	364	1.2625	1.708	1.2346	1.6681	811960000	166000000	341800000	132880000	171290000
14-3-3 protein zeta/delta	YWHAZ	11	8	7	6	6	5	5	41.6	27.745	245	1.4498	1.6949	1.3652	1.6304	207550000	32060000	48882000	54741000	71863000
Histone-binding protein RBBP4;Histone-binding protein RBBP7	RBBP4;RBBP7	21	10	10	7	9	7	9	24.9	46.158	410	1.2644	1.6699	0.99261	1.2725	655880000	125040000	168600000	166950000	195290000
40S ribosomal protein SA	RPSA;RPSAP58	4	6	6	4	6	4	6	28.4	29.505	264	1.2293	1.6357	0.84698	1.1022	365660000	68390000	76972000	117000000	103300000
Serine/threonine-protein phosphatase PGAM5, mitochondrial	PGAM5	3	9	9	4	7	4	7	27.7	32.004	289	1.3641	1.5989	0.53895	0.65201	304860000	25323000	26872000	166940000	85731000
ADP/ATP translocase 2;ADP/ATP translocase 2, N-terminally processed	SLC25A5	2	8	4	6	7	3	3	27.5	32.852	298	1.2559	1.58	1.0139	1.1491	1150500000	206040000	258560000	351850000	334000000
Eukaryotic initiation factor 4A-I;Eukaryotic initiation factor 4A-II	EIF4A1;EIF4A2	11	8	8	8	5	8	5	23.9	46.153	406	1.2298	1.5604	1.2279	1.6025	535570000	123200000	151670000	119590000	141100000
DNA polymerase subunit gamma-1	POLG	5	10	10	8	6	8	6	10.6	139.56	1239	1.1501	1.5532	0.73975	1.055	377620000	98149000	87513000	107100000	84864000
RuvB-like 1	RUVBL1	3	11	11	7	10	7	10	30.9	50.227	456	1.2526	1.5236	0.63591	0.79646	1115300000	232010000	246400000	384170000	252670000
PR domain zinc finger protein 10	PRDM10	9	10	10	4	9	4	9	11.9	126.98	1117	1.1449	1.521	0.62962	0.90017	732570000	105490000	115120000	314420000	197540000
Transcription initiation factor TFIID subunit 3	TAF3	2	13	13	12	11	12	11	15.8	103.58	929	1.1307	1.5074	0.58749	0.83591	2360800000	568490000	632400000	720030000	439890000
Zinc finger protein Helios	IKZF2	29	3	3	3	3	3	3	6.4	51.353	452	1.1242	1.4883	0.55418	0.72869	273790000	57176000	65797000	97206000	53609000
Small nuclear ribonucleoprotein-associated proteins B and B;Small nuclear ribonucleoprotein-associated protein N	SNRPB;SNRPN	8	6	6	3	6	3	6	18.4	29.975	288	1.1422	1.467	0.55879	0.67961	500700000	59209000	76901000	233630000	130960000
Phosphatidylinositol 5-phosphate 4-kinase type-2 beta	PIP4K2B	4	8	5	6	7	3	4	25	47.377	416	1.1064	1.4659	0.68346	0.87375	204370000	33657000	44721000	78250000	47740000
Serine/arginine-rich splicing factor 1	SRSF1	4	12	12	9	11	9	11	43.5	27.744	248	1.148	1.4645	0.59148	0.73348	1709700000	369460000	405050000	572200000	362990000
Polymerase I and transcript release factor	PTRF	4	7	7	5	6	5	6	22.8	43.476	390	1.0998	1.4619	1.0188	1.2461	480510000	75540000	148320000	128090000	128560000
Serine/arginine repetitive matrix protein 2	SRRM2	4	18	18	17	11	17	11	8.5	299.61	2752	0.98596	1.4618	0.58788	0.76851	1672500000	321680000	411440000	418060000	521320000
ATP synthase subunit beta, mitochondrial;ATP synthase subunit beta	ATP5B	7	8	8	5	6	5	6	18.9	55.308	518	1.1713	1.4615	1.0779	1.4081	180960000	23495000	20493000	60701000	76273000
Cyclic AMP-responsive element-binding protein 1;cAMP-responsive element modulator;Cyclic AMP-dependent transcription factor ATF-1	CREB1;CREM;ATF1	25	3	3	3	2	3	2	13	25.444	230	1.2541	1.4605	0.94003	1.1086	243940000	73325000	78166000	55223000	37223000
Chromatin assembly factor 1 subunit B	CHAF1B	1	7	7	7	6	7	6	17.2	61.492	559	1.2196	1.4601	0.90229	1.1899	343450000	88773000	105020000	79331000	70325000
WD repeat-containing protein 5	WDR5	1	3	3	3	3	3	3	12.6	36.588	334	1.2063	1.46	0.68935	0.87716	190520000	38406000	35469000	71028000	45620000
Centromere protein P	CENPP	3	3	3	2	3	2	3	11.1	33.165	288	1.1839	1.4506	0.56264	0.6953	92054000	17743000	17974000	30992000	25346000
Transcription factor AP-4	TFAP4	1	5	5	4	5	4	5	20.4	38.725	338	1.211	1.4241	0.72338	0.89016	193500000	42945000	43579000	53386000	53591000
Zinc finger protein 335	ZNF335	3	4	4	4	2	4	2	3.1	123.4	1119	1.1304	1.4212	0.75281	1.0332	144930000	43621000	48269000	29300000	23743000
Transcriptional repressor CTCF	CTCF	10	6	6	6	3	6	3	11.1	82.785	727	1.0716	1.4137	0.65237	0.85188	384750000	123710000	113380000	90092000	57563000
40S ribosomal protein S17-like;40S ribosomal protein S17	RPS17L;RPS17	5	3	3	3	1	3	1	31.1	15.55	135	1.1868	1.4127	1.2624	1.508	198130000	64547000	47574000	39544000	46465000
60 kDa heat shock protein, mitochondrial	HSPD1	9	12	12	9	10	9	10	27.2	61.054	573	1.1635	1.4084	1.1265	1.5134	1153300000	284900000	327200000	249820000	291370000
DNA polymerase subunit gamma-2, mitochondrial	POLG2	1	6	6	4	6	4	6	16.3	54.91	485	1.0615	1.4026	0.70752	0.85747	496340000	113370000	115590000	157820000	109560000
Phosphatidylinositol 5-phosphate 4-kinase type-2 alpha	PIP4K2A	4	11	8	8	11	5	8	35.2	46.224	406	1.126	1.3725	0.64307	0.78317	1346100000	232050000	396850000	272560000	444670000
Polycomb protein EED	EED	6	2	2	2	2	2	2	4.8	45.524	400	1.0809	1.3669	0.96547	1.2021	46345000	7826400	14405000	12085000	12028000
40S ribosomal protein S25	RPS25	1	4	4	4	4	4	4	24	13.742	125	1.1383	1.3591	1.0858	1.3164	2860300000	632980000	728330000	695450000	803550000
Protein ELYS	AHCTF1	2	22	22	19	21	19	21	12.3	252.5	2266	1.0671	1.348	0.93082	1.1787	2505700000	594400000	649480000	686540000	575250000
DNA-directed RNA polymerase I subunit RPA43	TWISTNB	1	10	10	6	9	6	9	32.5	37.432	338	1.0752	1.3473	0.56746	0.74605	1095800000	199310000	229290000	426790000	240370000
Phosphatidylinositol 5-phosphate 4-kinase type-2 gamma	PIP4K2C	7	8	8	5	7	5	7	23.6	45.053	403	1.0128	1.3466	0.65084	0.85854	670880000	136070000	149830000	239990000	144990000
F-actin-capping protein subunit alpha-1	CAPZA1	6	4	4	2	3	2	3	22	32.922	286	1.0031	1.3348	0.72411	0.95118	273910000	70070000	48456000	92949000	62437000
RuvB-like 2	RUVBL2	2	11	11	11	10	11	10	31.6	46.306	418	1.1224	1.3317	0.67509	0.85515	823130000	175000000	205650000	220800000	221670000
Serine/arginine-rich splicing factor 6	SRSF6	3	11	7	10	9	6	5	28.7	38.418	335	1.0931	1.3284	0.60848	0.7954	10053000000	2339500000	2417100000	3157700000	2138500000
Heparanase;Heparanase 8 kDa subunit;Heparanase 50 kDa subunit	HPSE	4	5	5	5	3	5	3	12	54.733	485	0.99546	1.3225	0.85414	1.1344	239990000	70953000	75408000	48205000	45420000
Thyroid hormone receptor-associated protein 3	THRAP3	1	10	10	7	8	7	8	11.7	108.66	955	1.0727	1.317	0.64429	0.8759	647080000	138170000	181760000	190360000	136790000
TATA-box-binding protein;TATA box-binding protein-like protein 2	TBP;TBPL2	6	7	7	6	7	6	7	26.9	34.751	316	1.047	1.3155	0.6287	0.81711	2716900000	626350000	677560000	857580000	555450000
Protein CMSS1	CMSS1	3	8	8	4	7	4	7	36.4	26.228	225	1.0267	1.3143	0.83468	1.022	613390000	133100000	235920000	128060000	116310000
40S ribosomal protein S10	RPS10	2	1	1	1	1	1	1	5.2	19.868	172	1.09	1.3122	1.1435	1.3774	85840000	10807000	12252000	28296000	34485000
General transcription factor 3C polypeptide 1	GTF3C1	2	19	19	14	12	14	12	10.2	236.28	2084	1.0298	1.3064	0.71314	0.9477	567500000	156990000	158050000	160810000	91650000
Cystatin-B	CSTB	1	6	6	5	6	5	6	79.6	11.139	98	1.0229	1.3015	0.91742	1.2239	10029000000	2538800000	2719500000	2383600000	2386600000
Nuclear autoantigen Sp-100	SP100	17	8	7	7	4	6	4	9.9	100.42	879	1.0308	1.2979	0.85133	1.0871	506690000	130270000	154110000	115670000	106640000
DNA-directed RNA polymerases I, II, and III subunit RPABC3	POLR2H	6	7	7	5	7	5	7	67.8	16.996	149	1.0337	1.2887	0.73729	0.91356	4002300000	662560000	677870000	1557800000	1104000000
Putative pre-mRNA-splicing factor ATP-dependent RNA helicase DHX15	DHX15	2	8	8	6	6	6	6	11.9	89.502	784	1.0374	1.2826	0.69592	0.85807	452680000	113630000	113600000	143510000	81937000
General transcription factor 3C polypeptide 4	GTF3C4	2	10	10	8	6	8	6	14.6	91.981	822	1.0066	1.2815	0.53702	0.73285	458010000	141950000	125050000	125690000	65317000
Vang-like protein 1	VANGL1	2	13	13	9	11	9	11	31.8	59.747	522	1.0038	1.2758	0.70326	0.87429	764300000	170970000	185980000	178740000	228600000
Fibroblast growth factor 2	FGF2	4	6	6	4	6	4	6	36.1	17.254	155	1.0545	1.2725	1.4151	1.8011	2164700000	412430000	481580000	515360000	755300000
RNA polymerase I-specific transcription initiation factor RRN3;Putative RRN3-like protein RRN3P2	RRN3;RRN3P2	8	16	16	14	15	14	15	23.5	70.466	621	0.97922	1.2688	0.53922	0.67862	2106700000	419300000	470370000	597580000	619450000
DNA-directed RNA polymerase I subunit RPA2;DNA-directed RNA polymerase	POLR1B	12	39	39	36	37	36	37	38.3	128.23	1135	0.9957	1.2686	0.68871	0.94884	13538000000	2999000000	3112600000	4062500000	3363800000
60S ribosomal protein L35	RPL35	3	5	5	4	5	4	5	33.3	14.551	123	0.98837	1.2685	0.97582	1.2566	22118000000	4721700000	9763800000	3719400000	3912900000
Histone-lysine N-methyltransferase NSD2	WHSC1	12	8	8	7	5	7	5	8.3	152.26	1365	1.0175	1.2643	0.84088	1.1863	419510000	97848000	107670000	117650000	96344000
Zinc finger X-chromosomal protein;Zinc finger Y-chromosomal protein	ZFX;ZFY	13	10	10	10	8	10	8	19.7	60.645	527	1.0316	1.2622	0.82889	1.0979	2070800000	648760000	656440000	406610000	358980000
Small nuclear ribonucleoprotein Sm D1	SNRPD1	1	3	3	2	3	2	3	20.2	13.281	119	1.0624	1.2605	0.66205	0.79046	308000000	69700000	73780000	82229000	82290000
Krueppel-like factor 3	KLF3	2	8	7	7	7	6	6	25.8	38.828	345	1.0144	1.2571	0.45124	0.53069	577900000	164360000	171230000	151950000	90361000
Cleavage and polyadenylation specificity factor subunit 5	NUDT21	2	5	5	3	5	3	5	27.3	26.227	227	0.98819	1.2569	0.58614	0.71128	189810000	35952000	40597000	71168000	42097000
U3 small nucleolar RNA-interacting protein 2	RRP9	1	7	7	5	2	5	2	15.6	51.84	475	0.98692	1.2528	0.795	1.0486	214980000	82087000	80217000	30817000	21856000
Probable ATP-dependent RNA helicase DDX60-like	DDX60L	7	43	42	35	38	35	37	32.1	197.67	1706	0.96935	1.2524	0.90923	1.2409	4417800000	1053900000	1038000000	1232200000	1093700000
Cytosolic carboxypeptidase 1	AGTPBP1	9	53	53	45	49	45	49	51.1	138.45	1226	0.99496	1.2504	0.74242	0.99258	16814000000	3922600000	3960600000	5059200000	3871500000
SWI/SNF-related matrix-associated actin-dependent regulator of chromatin subfamily A member 5	SMARCA5	2	11	6	9	11	4	6	11.4	116.78	995	0.98969	1.2491	0.74577	0.97739	944930000	224850000	257730000	246050000	216310000
General transcription factor 3C polypeptide 3	GTF3C3	3	13	13	12	9	12	9	19.2	101.27	886	1.0237	1.2457	0.57687	0.7781	873080000	224770000	188110000	291360000	168850000
Transketolase	TKT	5	4	4	3	2	3	2	9.3	58.981	540	0.97645	1.245	1.3532	1.7432	60033000	16968000	23205000	8112600	11748000
DNA-directed RNA polymerases I and III subunit RPAC2	POLR1D	2	8	8	6	8	6	8	69.2	15.237	133	0.9966	1.2443	0.66155	0.81288	1908700000	485360000	485580000	552620000	385180000
TATA box-binding protein-associated factor RNA polymerase I subunit D	TAF1D	4	7	7	6	7	6	7	31.7	32.057	278	0.96513	1.2418	0.70137	0.90962	1709500000	381790000	396440000	541560000	389710000
Nuclease-sensitive element-binding protein 1	YBX1	5	12	8	11	11	7	8	65.4	35.924	324	0.95124	1.2414	0.63622	0.79062	3326400000	923500000	925490000	909490000	567910000
Pleckstrin homology domain-containing family O member 1	PLEKHO1	4	4	4	3	4	3	4	11.5	46.236	409	0.93668	1.2387	0.95983	1.2649	343670000	60593000	59098000	113500000	110480000
Dehydrogenase/reductase SDR family member 2, mitochondrial	DHRS2	5	8	8	3	6	3	6	34.9	27.438	258	0.9633	1.237	0.85175	1.011	328720000	58788000	54531000	116660000	98745000
Centromere protein Q	CENPQ	1	9	9	3	8	3	8	42.5	30.595	268	1.0163	1.232	0.61058	0.71904	215030000	31574000	35733000	86281000	61445000
ATP synthase subunit alpha, mitochondrial	ATP5A1	2	9	9	7	7	7	7	25.6	54.493	503	0.97927	1.2255	0.94072	1.2161	436190000	98217000	101480000	122990000	113500000
Band 4.1-like protein 5	EPB41L5	4	8	6	5	7	4	5	15.7	77.519	687	1.0083	1.2251	0.93587	1.1224	425020000	98414000	96215000	131920000	98467000
Dolichyl-diphosphooligosaccharide--protein glycosyltransferase subunit 1	RPN1	5	5	5	5	4	5	4	10.4	68.569	607	0.93749	1.2249	0.70834	0.92755	181230000	41983000	49702000	47367000	42177000
60S acidic ribosomal protein P0;60S acidic ribosomal protein P0-like	RPLP0;RPLP0P6	14	3	3	3	2	3	2	18.5	30.456	281	1.0299	1.2216	0.96422	1.1458	145660000	53290000	46375000	20712000	25281000
Poly [ADP-ribose] polymerase 1	PARP1	4	65	65	62	64	62	64	63.3	113.08	1014	0.96721	1.2214	0.7096	0.92082	188770000000	45543000000	44013000000	58028000000	41183000000
Menin	MEN1	9	8	8	7	6	7	6	19.6	61.418	555	0.96219	1.2214	0.71421	0.93235	475260000	116470000	105460000	154470000	98858000
Putative 60S ribosomal protein L39-like 5;60S ribosomal protein L39	RPL39P5;RPL39	2	2	2	2	2	2	2	19.6	6.3225	51	0.73937	1.2201	0.73546	0.9748	9368400000	2785200000	2346600000	2448100000	1788600000
Unconventional myosin-Ib	MYO1B	6	7	6	3	5	2	5	7.9	128.48	1107	0.98999	1.2188	0.76634	1.093	158200000	30123000	35303000	57256000	35518000
DNA-directed RNA polymerases I, II, and III subunit RPABC1	POLR2E	1	13	13	11	11	11	11	75.2	24.551	210	0.96905	1.2131	0.66636	0.82954	6013100000	1374400000	1394100000	1915100000	1329500000
60S ribosomal protein L22-like 1	RPL22L1	3	4	4	4	2	4	2	45.5	14.478	121	0.94591	1.2114	0.93417	1.2539	1829600000	606780000	709460000	256120000	257240000
Arginine and glutamate-rich protein 1	ARGLU1	3	12	12	10	11	10	11	23.1	33.216	273	0.92933	1.21	0.85677	1.1247	7581100000	1836900000	1677400000	2133200000	1933700000
Serine/arginine-rich splicing factor 2	SRSF2	6	5	5	5	4	5	4	26.7	25.476	221	0.94543	1.2095	0.68781	0.92267	4678200000	1265900000	1309900000	1186700000	915710000
Serine/arginine-rich splicing factor 5	SRSF5	6	9	8	8	8	7	7	27.9	31.263	272	0.91694	1.2074	0.77878	0.98805	2609100000	676500000	627350000	747200000	558040000
Probable ATP-dependent RNA helicase DDX10	DDX10	3	25	25	24	23	24	23	36.5	100.89	875	0.91564	1.2071	0.8086	1.1416	3073400000	672880000	757450000	838150000	804890000
General transcription factor 3C polypeptide 2	GTF3C2	4	11	11	8	9	8	9	15.3	100.68	911	0.92718	1.2071	0.61205	0.80694	576060000	122400000	87470000	216210000	149980000
Heat shock 70 kDa protein 6;Putative heat shock 70 kDa protein 7	HSPA6;HSPA7	3	6	1	6	5	1	1	11.2	71.027	643	0.8981	1.2056	0.93317	1.2898	1424100000	346830000	272820000	427230000	377270000
Serine/arginine-rich splicing factor 4	SRSF4	3	10	6	9	9	5	5	21.2	46.737	406	0.91533	1.2039	0.60816	0.78216	914090000	332940000	189560000	266340000	125260000
Transmembrane protein 43	TMEM43	1	3	3	2	3	2	3	7.2	44.875	400	0.96925	1.203	0.77731	1.0248	94318000	15997000	14759000	33816000	29745000
Peptidyl-prolyl cis-trans isomerase;Peptidyl-prolyl cis-trans isomerase A;Peptidyl-prolyl cis-trans isomerase A, N-terminally processed	PPIA	7	3	3	2	3	2	3	26.7	13.022	120	0.99962	1.1978	1.1263	1.3337	290820000	49397000	59197000	77595000	104630000
Bromodomain adjacent to zinc finger domain protein 1A	BAZ1A	4	22	22	19	19	19	19	19.3	175.38	1524	0.92439	1.1973	0.65833	0.88812	1611900000	404120000	394960000	485360000	327450000
Dolichyl-diphosphooligosaccharide--protein glycosyltransferase subunit 2	RPN2	6	1	1	1	1	1	1	7.4	17.808	162	0.92179	1.1963	0.93432	1.2816	64245000	13367000	16376000	17374000	17128000
La-related protein 7	LARP7	8	19	19	17	16	17	16	37.5	66.898	582	0.90852	1.1962	0.63093	0.84316	2204500000	513250000	509540000	701090000	480640000
40S ribosomal protein S3	RPS3	14	4	4	2	4	2	4	17.7	26.688	243	0.93618	1.1958	0.77936	0.94109	104630000	17438000	15429000	37605000	34158000
Retinoblastoma-binding protein 5	RBBP5	2	6	6	5	6	5	6	15.6	59.152	538	0.99185	1.1935	0.9502	1.1487	196410000	38245000	37901000	67178000	53083000
S1 RNA-binding domain-containing protein 1	SRBD1	3	25	25	22	20	22	20	30.8	111.77	995	0.91239	1.1931	0.68961	0.94204	2382500000	621010000	651710000	577040000	532680000
40S ribosomal protein S16	RPS16	2	3	3	2	2	2	2	19.9	16.445	146	0.97208	1.1918	0.61426	0.73445	89939000	21021000	16051000	33307000	19559000
Probable global transcription activator SNF2L1	SMARCA1	4	9	4	9	8	4	3	8.8	117.26	1005	0.89309	1.1906	1.1767	1.6808	193380000	55841000	64738000	33984000	38814000
Nucleolar complex protein 3 homolog	NOC3L	3	15	15	11	14	11	14	20.6	92.623	800	0.99113	1.1899	0.78233	1.059	3143000000	852600000	816150000	844010000	630250000
Elongation factor Tu, mitochondrial	TUFM	1	5	5	5	3	5	3	12.8	49.541	452	0.89946	1.1876	0.83741	1.1002	182230000	47205000	47052000	52195000	35773000
60S ribosomal protein L28	RPL28	8	6	6	2	5	2	5	26.5	19.072	170	1.0069	1.1859	1.0473	1.2946	482900000	120790000	103850000	124290000	133960000
Centrin-2	CETN2	2	8	8	8	7	8	7	62.8	19.738	172	0.83806	1.1814	0.79911	1.0302	3427200000	904920000	842700000	871150000	808470000
Centrin-3	CETN3	6	4	4	4	4	4	4	43.6	18.336	156	0.92101	1.1814	0.7427	1.0053	4705300000	1140700000	1065200000	1369400000	1130000000
DNA-directed RNA polymerases I and III subunit RPAC1	POLR1C	8	17	17	16	16	16	16	68.8	39.249	346	0.93407	1.1812	0.68202	0.8873	11331000000	2529200000	2423800000	3779400000	2598300000
DNA-directed RNA polymerase I subunit RPA1;DNA-directed RNA polymerase	POLR1A	4	89	89	76	84	76	84	68.8	194.81	1720	0.93396	1.1805	0.66613	0.90475	35536000000	8110800000	8241800000	10923000000	8260200000
Transcription elongation factor, mitochondrial	TEFM	3	11	11	10	9	10	9	37.5	41.676	360	0.90945	1.1767	0.77123	1.0036	1155400000	268610000	333650000	285270000	267840000
Trifunctional enzyme subunit alpha, mitochondrial;Long-chain enoyl-CoA hydratase;Long chain 3-hydroxyacyl-CoA dehydrogenase	HADHA	3	29	29	25	27	25	27	50.3	82.999	763	0.93784	1.1763	0.83238	1.0165	7272800000	1682000000	1622700000	2171400000	1796700000
E3 ubiquitin-protein ligase RBBP6	RBBP6	4	60	60	56	55	56	55	34.2	201.56	1792	0.89242	1.1727	0.82709	1.1306	40176000000	10408000000	9521100000	11326000000	8921400000
Trifunctional enzyme subunit beta, mitochondrial;3-ketoacyl-CoA thiolase	HADHB	7	19	19	19	17	19	17	47.3	48.879	452	0.90153	1.1725	0.76278	1.0189	5572200000	1463400000	1299000000	1543100000	1266800000
40S ribosomal protein S15a	RPS15A	1	4	4	4	4	4	4	30.8	14.839	130	0.93711	1.1724	0.92283	1.1938	671750000	157880000	169760000	169470000	174630000
Heterogeneous nuclear ribonucleoproteins A2/B1	HNRNPA2B1	2	5	4	2	5	2	4	18.5	36.006	341	0.89455	1.1708	0.95689	1.2578	133250000	27072000	29823000	36507000	39848000
Serine/threonine-protein kinase TAO1	TAOK1	3	15	15	14	12	14	12	18.3	116.07	1001	0.9223	1.1696	1.0164	1.3248	1127200000	315940000	283940000	250670000	276650000
Alpha-enolase	ENO1	2	11	10	9	10	8	9	27	47.168	434	0.97752	1.1669	0.97454	1.1837	2364600000	437640000	646730000	664090000	616110000
Elongation factor 2	EEF2	5	14	13	10	11	9	11	21.6	95.337	858	0.89025	1.1639	0.9618	1.2813	557940000	161000000	149580000	133100000	114250000
Zinc finger CCHC domain-containing protein 9	ZCCHC9	1	2	2	1	2	1	2	8.9	30.477	271	1.0125	1.1638	0.77989	0.90888	135300000	25918000	23892000	54508000	30979000
E3 ubiquitin-protein ligase RING2	RNF2	2	6	5	4	5	3	4	25	37.655	336	0.94072	1.1638	0.80314	1.0011	219920000	50592000	39655000	67169000	62508000
CCAAT/enhancer-binding protein zeta	CEBPZ	3	20	20	17	15	17	15	22.8	114.16	998	0.88591	1.1597	0.92685	1.3082	1323300000	386680000	361440000	311890000	263260000
Leucine-rich repeat-containing protein 59	LRRC59	1	8	8	7	7	7	7	34.5	34.93	307	0.95466	1.1594	0.9929	1.2344	2869100000	650910000	602160000	779700000	836310000
Testis-specific Y-encoded-like protein 1	TSPYL1	2	3	3	3	2	3	2	8.2	49.192	437	0.96362	1.1541	0.76777	0.93731	123070000	39937000	28457000	33661000	21010000
DNA-directed RNA polymerases I, II, and III subunit RPABC5	POLR2L	1	2	2	2	2	2	2	29.9	7.645	67	0.97259	1.1536	0.67484	0.80533	137420000	42217000	43452000	30952000	20799000
ATP synthase subunit gamma;ATP synthase subunit gamma, mitochondrial	ATP5C1	3	6	6	4	5	4	5	25.2	27.512	250	0.94664	1.1482	0.93428	1.1112	291530000	58487000	57150000	95965000	79932000
Importin subunit alpha-1	KPNA2	1	14	14	12	14	12	14	34.8	57.861	529	0.89106	1.148	0.7414	0.9466	2246100000	502270000	461010000	735410000	547390000
Lysine-specific demethylase 2B	KDM2B	17	42	20	36	33	17	16	33.2	152.61	1336	0.86661	1.1469	0.82774	1.0848	5785400000	1595500000	1641200000	1330500000	1218300000
60S ribosomal protein L37a	RPL37A	5	5	5	5	4	5	4	69.1	7.624	68	0.97435	1.1443	0.97068	1.1907	10247000000	3183700000	3090900000	2030500000	1942200000
Myb-binding protein 1A	MYBBP1A	3	51	51	46	49	46	49	44.5	148.85	1328	0.89619	1.1443	0.69189	0.93272	12359000000	3182800000	2935100000	3652500000	2588600000
Chromodomain-helicase-DNA-binding protein 2	CHD2	16	32	32	28	27	28	27	20.5	200.56	1739	0.88236	1.144	1.1854	1.5523	4601900000	1172700000	1191000000	1046800000	1191400000
Collagen alpha-3(VI) chain	COL6A3	10	33	33	28	23	28	23	15.6	322.18	2976	0.9127	1.1414	0.76452	1.0244	9594900000	483210000	8462200000	385470000	264000000
AP-2 complex subunit mu	AP2M1	8	3	3	3	2	3	2	10.4	42.701	375	0.93384	1.1411	0.90614	1.1099	125810000	32073000	30334000	32805000	30596000
Krueppel-like factor 12	KLF12	3	8	7	6	8	5	7	29.9	44.187	402	0.92914	1.1408	0.46901	0.61462	4027100000	976860000	906330000	1494200000	649650000
Crossover junction endonuclease EME1	EME1	3	6	6	5	4	5	4	13	63.251	570	0.89145	1.1407	0.7441	0.90156	307630000	56633000	57097000	107290000	86609000
Serine/threonine-protein kinase PRP4 homolog	PRPF4B	4	35	35	32	33	32	33	33.5	116.99	1007	0.91166	1.1393	0.85137	1.0747	47694000000	10739000000	10556000000	14031000000	12369000000
60S ribosomal protein L38	RPL38	1	5	5	5	3	5	3	50	8.2178	70	0.88267	1.1375	0.89409	1.1493	1622100000	650150000	574400000	209270000	188320000
TATA box-binding protein-associated factor RNA polymerase I subunit A	TAF1A	5	19	19	17	18	17	18	51.8	52.675	450	0.90039	1.1359	0.6834	0.877	5879100000	1417700000	1367500000	1799700000	1294100000
Round spermatid basic protein 1	RSBN1	3	29	27	26	24	24	22	47.4	90.071	802	0.88958	1.1352	0.71959	0.99068	8930600000	2149700000	1960100000	2741500000	2079200000
ATP-dependent RNA helicase DHX36	DHX36	7	51	51	48	49	48	49	56.4	114.76	1008	0.89426	1.1336	0.74624	0.99331	70197000000	19095000000	16571000000	19383000000	15148000000
Histone H1.0;Histone H1.0, N-terminally processed	H1F0	3	9	9	7	7	7	7	28.4	20.863	194	0.95913	1.1331	0.86998	1.0448	9235300000	2156600000	2099000000	2562900000	2416800000
60S ribosomal protein L22	RPL22	1	6	6	6	5	6	5	53.1	14.787	128	0.89063	1.1312	0.82718	1.0813	11558000000	3536900000	3249400000	2543600000	2228600000
Round spermatid basic protein 1-like protein	RSBN1L	3	30	28	29	30	27	28	39.8	94.868	846	0.90136	1.1307	0.73934	0.96451	18042000000	4037900000	4424400000	5241500000	4338200000
Chromodomain-helicase-DNA-binding protein 3	CHD3	14	20	20	13	14	13	14	12.1	222.86	1966	0.9167	1.1299	0.64038	0.86563	615230000	131150000	118510000	219070000	146510000
Heat shock 70 kDa protein 1A/1B	HSPA1A	10	10	4	10	9	4	4	17.4	77.405	708	0.85332	1.1298	0.79277	1.0386	995740000	245160000	221350000	273940000	255280000
Active regulator of SIRT1	RPS19BP1	2	3	3	3	2	3	2	28.7	15.434	136	0.879	1.1272	0.69834	0.9313	182620000	49339000	45897000	47193000	40188000
60S ribosomal protein L36a-like	RPL36AL	1	8	2	8	8	2	2	46.2	12.469	106	0.90008	1.1272	0.89761	1.147	23797000000	5982800000	5817400000	6196000000	5800900000
60S ribosomal protein L10	RPL10	4	13	2	12	13	2	2	49.1	24.604	214	0.88395	1.1255	0.89976	1.1233	58677000000	15903000000	14985000000	14580000000	13209000000
	RPL10	1	12	1	11	12	1	1	57.7	18.592	163	0.87936	1.1246	0.89026	1.1334	3371700000	920830000	830200000	843160000	777550000
39S ribosomal protein L38, mitochondrial	MRPL38	2	2	2	2	2	2	2	4.5	44.596	380	0.89103	1.1244	0.97105	1.2146	83428000	22659000	20607000	21755000	18407000
Transcription factor Sp1	SP1	2	5	5	3	4	3	4	11.8	80.692	785	0.9106	1.123	0.98057	1.1548	428740000	121400000	102690000	108040000	96615000
Protein DEK	DEK	5	16	7	14	14	6	6	39.5	42.674	375	0.92036	1.1214	0.91216	1.13	14193000000	3362900000	3298300000	3849300000	3682900000
Interferon-inducible protein AIM2	AIM2	3	18	18	15	18	15	18	56	38.953	343	0.89782	1.1207	0.90082	1.0873	3574200000	800620000	726500000	1089200000	957920000
Nucleolar protein 58	NOP58	2	32	32	32	31	32	31	59.5	59.578	529	0.85048	1.119	0.84745	1.1008	76090000000	19640000000	17087000000	21113000000	18250000000
Nuclear apoptosis-inducing factor 1	NAIF1	2	10	10	8	9	8	9	48	35.164	327	0.86257	1.1178	0.70303	0.91421	5378600000	1598200000	1362100000	1456400000	961970000
Serine/arginine-rich splicing factor 7	SRSF7	7	7	6	7	7	6	6	41.2	18.841	165	0.9318	1.1175	0.67015	0.87585	1695000000	384290000	336440000	595370000	378880000
U4/U6 small nuclear ribonucleoprotein Prp3	PRPF3	3	22	22	20	22	20	22	43.8	77.528	683	0.87367	1.1158	0.72302	0.92056	4728400000	1014300000	892530000	1574100000	1247500000
Lysine-specific demethylase 2A	KDM2A	6	14	13	13	12	12	11	15.7	132.79	1162	0.84465	1.1126	0.82136	1.0887	1618900000	457820000	370290000	409460000	381370000
ATP-dependent RNA helicase DDX39A;Spliceosome RNA helicase DDX39B	DDX39B;DDX39A;DDX39;hCG_2005638	25	2	2	2	2	2	2	4.7	48.825	425	0.84201	1.1123	0.69924	0.92233	128820000	27061000	21764000	44289000	35702000
Tissue factor pathway inhibitor 2	TFPI2	1	9	9	9	9	9	9	40	26.934	235	0.9149	1.1123	0.90193	1.139	9066200000	2446700000	2352700000	2149800000	2116900000
40S ribosomal protein S7	RPS7	2	11	11	10	9	10	9	56.7	22.127	194	0.89062	1.11	0.98255	1.1807	6599100000	1495000000	1325500000	1937900000	1840700000
Dynein light chain 2, cytoplasmic;Dynein light chain 1, cytoplasmic	DYNLL2;DYNLL1	2	2	2	2	2	2	2	24.7	10.35	89	0.91074	1.1083	0.76747	0.92548	638360000	193340000	171380000	159400000	114230000
Krueppel-like factor 5	KLF5	3	5	5	2	4	2	4	20.1	48.886	437	0.84211	1.1081	0.35098	0.42838	321090000	49813000	41138000	182220000	47916000
Inactive serine/threonine-protein kinase VRK3	VRK3	5	5	5	5	4	5	4	13.3	45.903	412	0.92483	1.1077	1.1617	1.521	133240000	33779000	30576000	33480000	35401000
Cytoskeleton-associated protein 4	CKAP4	4	8	8	4	5	4	5	15.4	66.022	602	0.90611	1.1069	0.95945	0.79334	159090000	24708000	10521000	66645000	57216000
14-3-3 protein epsilon	YWHAE	2	9	8	8	7	7	6	42	29.174	255	0.89741	1.1066	0.8988	1.0938	840990000	228760000	193140000	216750000	202340000
5-methylcytosine rRNA methyltransferase NSUN4	NSUN4	4	8	8	7	6	7	6	26	37.373	335	0.86704	1.1057	0.83353	0.99977	460850000	125700000	102030000	127820000	105300000
Zinc finger and BTB domain-containing protein 2	ZBTB2	1	18	18	18	16	18	16	50.4	57.336	514	0.84847	1.1056	0.87028	1.1551	20944000000	4810500000	3854200000	6570200000	5708800000
Zinc finger protein basonuclin-2	BNC2	11	7	7	6	5	6	5	7.9	111.44	1004	0.87408	1.101	0.56851	0.8085	311430000	75492000	74773000	97024000	64140000
40S ribosomal protein S23	RPS23	5	7	7	6	7	6	7	49	15.807	143	0.87462	1.0967	0.85267	1.0961	15187000000	4197700000	3936700000	3647400000	3405500000
60S ribosomal protein L17	RPL17	2	11	11	10	9	10	9	53.3	21.397	184	0.93137	1.0955	0.94181	1.0701	30337000000	7396100000	6579200000	8673100000	7688400000
TATA box-binding protein-associated factor RNA polymerase I subunit B	TAF1B	7	19	19	18	17	18	17	41	68.831	588	0.89006	1.0954	0.68579	0.88204	4840800000	1239900000	1092600000	1514100000	994260000
TBC1 domain family member 10B	TBC1D10B	2	14	14	12	12	12	12	23.5	87.198	808	0.8164	1.0938	0.77644	1.0723	1228000000	320730000	215230000	449340000	242750000
Protein disulfide-isomerase	P4HB	5	7	7	7	3	7	3	17.3	51.125	451	0.92372	1.0934	0.9503	1.2788	398700000	131030000	122770000	74217000	70687000
40S ribosomal protein S24	RPS24	5	5	5	5	5	5	5	35.9	15.197	131	0.88228	1.093	0.81126	1.0419	11460000000	2566900000	2698800000	3255700000	2938200000
Cathepsin K	CTSK	3	10	10	8	9	8	9	52.3	36.966	329	0.91921	1.0905	0.88945	1.0199	5243700000	1455200000	1462900000	1204400000	1121100000
Vimentin	VIM	22	33	29	30	31	27	27	65	53.651	466	0.81673	1.0904	1.6045	2.0753	9075700000	2248500000	2105300000	1860000000	2861900000
Neuropathy target esterase	PNPLA6	5	7	7	6	7	6	7	7.5	143.35	1300	0.82895	1.0897	0.81273	1.1559	350210000	91787000	76729000	97347000	84346000
H/ACA ribonucleoprotein complex subunit 4	DKC1	4	36	36	36	35	36	35	66.3	57.673	514	0.84363	1.0882	0.71339	0.92997	106720000000	29038000000	25357000000	30177000000	22152000000
40S ribosomal protein S8	RPS8	2	9	9	9	8	9	8	47.1	24.205	208	0.8598	1.088	0.8915	1.1309	29253000000	8172900000	7229000000	7161900000	6689400000
Transcription factor Sp3	SP3	1	10	1	8	8	1	1	23.4	53.715	496	0.82575	1.0873	0.8289	1.0925	121550000	32609000	29843000	32484000	26615000
Signal recognition particle subunit SRP72	SRP72	4	22	22	21	16	21	16	38.3	74.605	671	0.9014	1.0865	0.95379	1.1829	2363500000	592670000	537800000	610940000	622040000
Crossover junction endonuclease MUS81	MUS81	6	6	6	5	4	5	4	17.2	43.358	389	0.88979	1.0855	0.57665	0.75982	221200000	85991000	50330000	52374000	32509000
ATPase family AAA domain-containing protein 5	ATAD5	2	14	14	13	10	13	10	9.6	207.57	1844	0.83125	1.0853	0.72243	1.03	783770000	207930000	152690000	242050000	181090000
Nucleolar complex protein 4 homolog	NOC4L	2	3	3	3	2	3	2	9.1	58.467	516	0.85776	1.0849	0.60288	0.73477	130050000	41676000	43536000	27995000	16841000
Hepatoma-derived growth factor-related protein 2	HDGFRP2	7	6	5	4	6	3	5	11.9	74.229	670	0.86822	1.0848	0.74928	0.94818	534280000	134090000	117620000	160970000	121600000
Cell division cycle 5-like protein	CDC5L	2	29	29	25	28	25	28	45.4	92.25	802	0.85739	1.0843	0.70985	0.92655	4953100000	1190000000	957290000	1625100000	1180600000
Periodic tryptophan protein 1 homolog	PWP1	6	21	21	18	18	18	18	51.5	55.827	501	0.83254	1.0833	0.78152	1.0064	12110000000	3320700000	3018500000	3103300000	2667600000
60S ribosomal protein L27a	RPL27A	4	6	6	6	5	6	5	35.1	16.561	148	0.87268	1.08	0.90146	1.0701	10274000000	1973800000	1741000000	3438900000	3120700000
60S ribosomal protein L21	RPL21	2	3	3	2	3	2	3	25.6	18.565	160	0.92936	1.0788	0.8363	0.96967	907530000	223590000	205570000	259780000	218590000
40S ribosomal protein S30	FAU	2	2	2	2	2	2	2	11.2	10.905	98	0.85402	1.0786	0.86946	1.0703	5793400000	1692600000	1491500000	1351100000	1258200000
Heterogeneous nuclear ribonucleoprotein U-like protein 1	HNRNPUL1	5	9	9	4	9	4	9	15	86.121	767	0.81091	1.0763	0.45112	0.64305	392620000	98950000	67967000	157420000	68290000
Ubiquitin-40S ribosomal protein S27a;Ubiquitin;40S ribosomal protein S27a;Polyubiquitin-B;Ubiquitin;Polyubiquitin-C;Ubiquitin	RPS27A;UBC;UBB	18	5	2	4	4	1	1	42.3	17.965	156	0.81193	1.0745	0.79273	0.98594	3088900000	745350000	832680000	773250000	737600000
Eukaryotic translation initiation factor 5B	EIF5B	1	14	14	13	11	13	11	13	138.83	1220	0.87284	1.0702	0.825	1.0637	7865300000	2427300000	2166700000	1799500000	1471800000
Transcription factor Sp3	SP3	7	11	2	9	9	2	2	14.2	81.924	781	0.84279	1.0698	0.91645	1.2022	6301500000	1568400000	1325800000	1751500000	1655800000
ATP-binding cassette sub-family F member 1	ABCF1	8	16	16	15	13	15	13	25.2	91.679	807	0.8183	1.0694	0.79903	1.1287	1377200000	391240000	342340000	360350000	283310000
Mitochondrial ribonuclease P protein 1	TRMT10C	2	5	5	4	5	4	5	15.9	47.346	403	0.8934	1.0667	1.039	1.258	283640000	76025000	69705000	67823000	70089000
X-ray repair cross-complementing protein 5	XRCC5	2	43	43	39	41	39	41	68.4	82.704	732	0.8419	1.0646	0.71219	0.90947	66957000000	16197000000	13571000000	21289000000	15900000000
Nucleolar complex protein 2 homolog	NOC2L	1	7	7	6	5	6	5	9.9	84.918	749	0.79021	1.0646	0.54894	0.78891	332400000	79705000	55652000	120900000	76146000
G patch domain-containing protein 8	GPATCH8	2	7	7	6	5	6	5	6.9	155.19	1424	0.90351	1.0641	0.90077	1.0621	416700000	111410000	105100000	103300000	96889000
U4/U6 small nuclear ribonucleoprotein Prp4	PRPF4	2	20	20	19	17	19	17	48.2	58.32	521	0.81633	1.063	0.75677	0.94542	5980100000	1560500000	1227700000	1842700000	1349100000
40S ribosomal protein S18	RPS18	2	6	6	6	6	6	6	34.2	17.718	152	0.82617	1.0614	0.8967	1.1081	734230000	209130000	195100000	171520000	158470000
Actin, cytoplasmic 2;Actin, cytoplasmic 2, N-terminally processed	ACTG1	7	21	1	21	21	1	1	70.4	41.792	375	0.82683	1.0613	0.65711	0.85314	44914000000	12234000000	9802700000	13889000000	8987200000
60S ribosomal protein L3	RPL3	6	24	24	22	21	22	21	48.6	46.108	403	0.82786	1.0606	0.85865	1.106	30245000000	8169900000	6890200000	8083400000	7102000000
Heat shock cognate 71 kDa protein	HSPA8	19	30	25	28	26	23	23	52	70.897	646	0.83407	1.0599	0.81415	1.0546	15656000000	4154300000	3539300000	4282400000	3679600000
DnaJ homolog subfamily A member 1	DNAJA1	3	4	4	4	3	4	3	14.9	44.868	397	0.89646	1.0598	0.61518	0.7458	261060000	87159000	70063000	65932000	37902000
Coiled-coil domain-containing protein 86	CCDC86	4	16	16	14	15	14	15	40.8	40.235	360	0.73833	1.0594	0.63629	0.86532	2986600000	718120000	580710000	963890000	723880000
60S ribosomal protein L26	RPL26	2	14	3	13	12	3	2	53.8	17.258	145	0.87448	1.0584	0.87437	1.0506	30355000000	8199500000	7648300000	7725500000	6781200000
Ribosome-binding protein 1	RRBP1	18	50	2	45	49	2	2	41.4	152.47	1410	0.81399	1.057	0.87433	1.1648	19603000000	5533800000	4711100000	5033400000	4324900000
Putative elongation factor 1-alpha-like 3;Elongation factor 1-alpha 1;Elongation factor 1-alpha 2	EEF1A1P5;EEF1A1;EEF1A2	8	10	10	9	10	9	10	29.7	50.184	462	0.82076	1.0564	0.83987	1.052	5697700000	1509700000	1316600000	1558000000	1313500000
ATP-dependent DNA helicase Q1	RECQL	7	19	19	14	18	14	18	37.3	73.457	649	0.87276	1.0563	0.73221	0.93272	2614000000	489240000	405820000	816660000	902290000
60S ribosomal protein L24	RPL24	3	14	14	10	12	10	12	59.5	14.369	121	0.87659	1.056	0.87498	1.0355	79494000000	24274000000	22230000000	17100000000	15889000000
40S ribosomal protein S6	RPS6	2	13	4	13	8	4	4	41.4	28.68	249	0.88841	1.0557	0.92926	1.0973	38940000000	13213000000	11566000000	7569500000	6591700000
DNA-directed RNA polymerase I subunit RPA49	POLR1E	4	25	25	24	25	24	25	64.7	47.26	419	0.83961	1.0555	0.76893	0.9505	55651000000	14256000000	12011000000	16759000000	12625000000
60S ribosomal protein L36a	RPL36A;RPL36A-HNRNPH2	3	8	2	8	8	2	2	46.2	12.441	106	0.90374	1.0551	0.94361	1.116	818720000	250110000	231020000	163450000	174140000
40S ribosomal protein S2	RPS2	8	6	6	4	5	4	5	34.4	21.154	195	0.8725	1.053	0.99499	1.2014	499710000	108970000	87400000	149730000	153610000
60S ribosomal protein L7a	RPL7A	3	18	18	17	17	17	17	51.1	29.995	266	0.88109	1.053	0.81632	0.98636	26017000000	6456100000	5681600000	7510000000	6368900000
PC4 and SFRS1-interacting protein	PSIP1	2	12	11	11	12	10	11	26.4	60.103	530	0.85093	1.0524	0.77121	0.93945	3182000000	654300000	560960000	1103300000	863460000
Lethal(3)malignant brain tumor-like protein 4	L3MBTL4	4	3	2	3	3	2	2	4.7	70.136	614	0.8352	1.0494	0.60709	0.75424	56612000	15217000	11379000	20848000	9167200
TATA box-binding protein-associated factor RNA polymerase I subunit C	TAF1C	8	24	24	22	21	22	21	38.8	85.041	776	0.79377	1.0475	0.65463	0.83492	7955100000	1931200000	1543200000	2735800000	1744900000
Set1/Ash2 histone methyltransferase complex subunit ASH2	ASH2L	7	3	3	2	2	2	2	8.6	55.324	489	0.8245	1.0462	0.72599	0.89682	112990000	33475000	26303000	34147000	19069000
78 kDa glucose-regulated protein	HSPA5	2	30	29	30	29	29	28	47.7	72.332	654	0.80299	1.042	0.77591	0.9846	14263000000	4076900000	3376000000	4001100000	2809300000
40S ribosomal protein S26;Putative 40S ribosomal protein S26-like 1	RPS26;RPS26P11	3	5	5	5	4	5	4	45.2	13.015	115	0.8508	1.0409	0.91332	1.1111	15193000000	4603700000	3626700000	3700900000	3262200000
60S ribosomal protein L23a	RPL23A	3	17	17	15	15	15	15	55.1	17.695	156	0.88476	1.0408	0.88878	1.0455	128000000000	38166000000	35825000000	27725000000	26285000000
HMG box transcription factor BBX	BBX	5	7	7	5	5	5	5	11.3	101.55	911	0.77643	1.0405	0.76338	0.97476	577540000	158530000	126280000	168590000	124130000
Ras GTPase-activating-like protein IQGAP1	IQGAP1	5	8	8	7	7	7	7	6	189.25	1657	0.86341	1.0402	0.91594	1.2626	307210000	81761000	54814000	98120000	72520000
Pre-mRNA-splicing factor SPF27	BCAS2	1	14	14	10	12	10	12	67.6	26.131	225	0.90207	1.0395	0.67588	0.84295	1314100000	281600000	222530000	459780000	350230000
Ribosome biogenesis protein NSA2 homolog	NSA2	2	10	10	7	10	7	10	44.6	30.065	260	0.81187	1.0388	0.87691	1.094	1930900000	587730000	472340000	446850000	423960000
Ribonucleases P/MRP protein subunit POP1	POP1	2	15	15	14	12	14	12	18.7	114.71	1024	0.84867	1.0386	0.88086	1.2052	1295500000	349470000	305970000	348960000	291080000
NHP2-like protein 1;NHP2-like protein 1, N-terminally processed	NHP2L1	2	9	9	7	9	7	9	75.8	14.173	128	0.84584	1.0372	0.81093	1.0243	14166000000	3275500000	2875600000	4348000000	3667100000
X-ray repair cross-complementing protein 6	XRCC6	5	44	44	41	42	41	42	69.1	69.842	609	0.82042	1.0356	0.69853	0.90378	89206000000	22339000000	18746000000	28297000000	19823000000
ALS2 C-terminal-like protein	ALS2CL	4	1	1	1	1	1	1	3.7	34.998	300	0.86228	1.0355	0.90557	1.1174	7161300000	1825600000	1724200000	1888900000	1722500000
Luc7-like protein 3	LUC7L3	9	13	13	10	13	10	13	33.8	51.466	432	0.82502	1.0336	0.78991	1.0352	1874200000	470390000	464240000	493260000	446340000
DNA topoisomerase 1	TOP1	10	101	95	93	96	87	90	72.8	90.725	765	0.83395	1.0331	0.81906	1.0558	1884600000000	462220000000	386260000000	564350000000	471730000000
3-hydroxyacyl-CoA dehydrogenase type-2	HSD17B10	3	6	6	2	6	2	6	38.7	26.923	261	0.84176	1.0321	0.85228	1.0948	145310000	13730000	12737000	72998000	45847000
Histone H1.5	HIST1H1B	1	21	14	18	20	11	14	42	22.58	226	0.8326	1.0313	0.80435	0.98658	92597000000	20019000000	16941000000	30419000000	25218000000
60S ribosomal protein L7	RPL7	4	11	11	9	9	9	9	43.1	29.225	248	0.85846	1.0306	0.86597	1.0593	2740400000	737900000	750850000	659110000	592570000
Zinc finger and BTB domain-containing protein 48	ZBTB48	3	6	6	5	4	5	4	12.9	77.053	688	0.85381	1.0298	0.57275	0.69047	252030000	64078000	57782000	87354000	42814000
Endonuclease III-like protein 1	NTHL1	1	7	7	5	7	5	7	32.4	34.389	312	0.83323	1.0297	0.74791	0.92405	707770000	150420000	134780000	223060000	199510000
60S ribosomal protein L27	RPL27	1	7	7	7	6	7	6	47.1	15.798	136	0.79267	1.0282	0.74646	0.95578	43139000000	12069000000	10590000000	11007000000	9473900000
Prelamin-A/C;Lamin-A/C	LMNA	13	11	11	10	7	10	7	21.5	65.134	572	0.78808	1.0281	0.83784	1.0711	435750000	113220000	133550000	91501000	97473000
Sp110 nuclear body protein	SP110	12	16	16	15	14	15	14	40.8	61.739	547	0.83645	1.0238	0.8759	1.0403	2086800000	639420000	493800000	509500000	444070000
Pre-mRNA-processing factor 19	PRPF19	5	17	17	15	15	15	15	46.4	55.18	504	0.77207	1.023	0.60846	0.81276	8031700000	2115700000	1798300000	2452400000	1665300000
Histone H1.2	HIST1H1C	1	22	5	21	20	5	4	48.8	21.364	213	0.82933	1.0216	0.80358	0.99095	121900000000	40753000000	34912000000	24211000000	22021000000
Pleiotropic regulator 1	PLRG1	8	14	14	8	13	8	13	39.5	57.181	514	0.87091	1.0213	0.73471	0.93231	889690000	141030000	123860000	378430000	246360000
Gem-associated protein 5	GEMIN5	1	1	1	1	1	1	1	0.7	168.59	1508	0.77474	1.021	0.753	1.07	333570000	110560000	76236000	78817000	67953000
Protein FAM133B;Protein FAM133A	FAM133B;FAM133A	5	6	6	5	6	5	6	46.7	12.41	105	0.79277	1.0205	0.68171	0.86596	1593100000	370970000	313140000	528540000	380480000
Protein SREK1IP1	SREK1IP1	1	4	4	2	4	2	4	35.5	18.177	155	0.84869	1.0205	0.75734	0.94781	842670000	248700000	227360000	207960000	158660000
Importin subunit alpha-5;Importin subunit alpha-5, N-terminally processed	KPNA1	7	11	6	9	11	4	6	28.1	60.221	538	0.82913	1.0201	0.59839	0.78936	946050000	264980000	209750000	280600000	190730000
Gamma-interferon-inducible protein 16	IFI16	11	27	27	22	25	22	25	46.8	75.935	673	0.81286	1.0174	0.76251	0.93388	3158600000	613510000	534370000	1130500000	880200000
60S ribosomal protein L13	RPL13	2	13	13	10	12	10	12	49.8	24.261	211	0.82354	1.0165	0.84969	1.0708	16714000000	5021200000	3796800000	4338800000	3557000000
BCL-6 corepressor	BCOR	6	14	13	10	13	9	12	11.5	186.23	1703	0.83428	1.0163	0.608	0.80242	1022100000	212510000	148080000	375500000	286000000
Prohibitin-2	PHB2	8	2	2	2	2	2	2	10.9	29.723	267	0.82849	1.0152	0.82534	1.024	142930000	48501000	35562000	34030000	24838000
Clathrin heavy chain 1	CLTC	4	8	8	6	7	6	7	6.6	187.89	1639	0.8408	1.014	0.92803	1.1318	177230000	38283000	36483000	58474000	43986000
Replication factor C subunit 5	RFC5	8	15	15	14	14	14	14	60.5	36.104	319	0.80524	1.0132	0.73494	0.91964	4152800000	1096500000	858170000	1229400000	968710000
DNA ligase 3	LIG3	2	19	19	16	19	16	19	21.5	112.91	1009	0.80264	1.0111	0.649	0.8846	2246100000	567220000	467520000	711680000	499630000
Nucleolar MIF4G domain-containing protein 1	NOM1	1	17	17	15	12	15	12	21.6	96.256	860	0.78312	1.0105	0.76615	1.0866	997020000	275800000	215330000	262690000	243200000
Transmembrane and coiled-coil domain-containing protein 1	TMCO1	3	2	2	2	1	2	1	13.6	18.819	169	0.78884	1.0102	0.72365	0.94935	197460000	54546000	49079000	53179000	40658000
Nucleolar transcription factor 1	UBTF	1	35	3	34	34	3	3	41	89.405	764	0.78553	1.0094	0.97502	1.261	63250000000	16761000000	12954000000	17259000000	16276000000
Endoplasmin	HSP90B1	5	7	6	6	4	5	3	10	92.468	803	0.83327	1.0088	0.84218	1.1618	289090000	68773000	65194000	77272000	77854000
Serine/arginine repetitive matrix protein 1	SRRM1	5	25	25	24	24	24	24	27.7	103.39	913	0.80206	1.0085	0.6594	0.83718	58813000000	15878000000	12718000000	18257000000	11961000000
Krueppel-like factor 10	KLF10	2	7	7	4	7	4	7	16	51.423	469	0.77868	1.0079	1.2069	1.4272	341630000	90325000	73131000	88937000	89236000
Replication factor C subunit 2	RFC2	3	14	14	14	12	14	12	48.9	39.157	354	0.79709	1.0077	0.70053	0.9206	2886800000	812510000	625330000	817870000	631130000
Heterogeneous nuclear ribonucleoprotein M	HNRNPM	4	14	14	11	11	11	11	25.8	73.62	691	0.80393	1.0061	0.73895	0.9509	1358400000	466720000	273550000	343330000	274790000
Zinc finger MYND domain-containing protein 11	ZMYND11	6	17	1	15	13	0	1	34	66.518	567	0.78639	1.0052	0.82582	1.043	2776900000	698540000	578550000	815040000	684790000
Heterogeneous nuclear ribonucleoprotein A1;Heterogeneous nuclear ribonucleoprotein A1, N-terminally processed;Heterogeneous nuclear ribonucleoprotein A1-like 2	HNRNPA1;HNRNPA1L2	14	6	5	3	5	3	4	30.7	25.687	231	0.84823	1.0049	0.81264	1.0492	152680000	48890000	37827000	34640000	31323000
Zinc finger protein 512	ZNF512	5	6	6	5	5	5	5	14.5	64.594	566	0.7914	1.0048	1.026	1.2897	238760000	70048000	53052000	52284000	63376000
Myb/SANT-like DNA-binding domain-containing protein 3	MSANTD3	1	4	4	3	3	3	3	16.4	32.363	275	0.83155	1.0028	1.0351	1.213	190100000	46258000	41081000	47304000	55460000
Replication factor C subunit 3	RFC3	3	15	15	14	15	14	15	50.6	40.556	356	0.7871	1.0015	0.76441	0.96701	3573300000	935220000	736080000	1085200000	816830000
Zinc finger protein 639	ZNF639	3	13	13	11	9	11	9	27.6	56.054	485	0.82004	1.001	0.86194	1.0689	1336000000	414230000	367720000	280140000	273940000
60S ribosomal protein L32	RPL32	4	6	6	6	6	6	6	46.6	15.616	133	0.80992	1.0003	0.83162	1.033	3791700000	1256000000	943000000	900070000	692680000
Peptidyl-prolyl cis-trans isomerase;Peptidyl-prolyl cis-trans isomerase H	PPIH	5	5	5	3	5	3	5	29.2	15.8	144	0.88531	0.99958	0.68582	0.78516	854580000	226680000	188720000	255040000	184130000
Putative RNA-binding protein Luc7-like 2;UPF0562 protein C7orf55	LUC7L2;C7orf55	7	11	7	9	11	6	7	32.7	46.513	392	0.80936	0.99934	0.79996	0.99626	1841700000	567020000	398210000	478480000	398010000
Cell growth-regulating nucleolar protein	LYAR	2	30	30	26	29	26	29	62	43.614	379	0.78722	0.99889	0.7936	0.98283	82733000000	24984000000	19087000000	21835000000	16827000000
Signal recognition particle 9 kDa protein	SRP9	3	5	5	5	2	5	2	53.5	10.112	86	0.79114	0.99886	0.70937	0.84903	6616600000	3303000000	2531700000	428130000	353840000
SRSF protein kinase 1	SRPK1	16	10	10	7	10	7	10	26.1	62.032	547	0.79412	0.99835	1	1.3244	1248900000	263600000	245240000	365970000	374060000
Aprataxin	APTX	21	6	6	4	6	4	6	30.8	33.294	292	0.78848	0.99819	0.62757	0.78904	890320000	205710000	173550000	308760000	202290000
Transcription termination factor 1	TTF1	2	27	27	24	27	24	27	39	100.82	882	0.79616	0.99783	0.80068	1.0345	8749700000	2263100000	2026400000	2321300000	2139000000
Serum response factor-binding protein 1	SRFBP1	1	14	14	13	11	13	11	33.8	48.633	429	0.8398	0.99719	0.88183	1.0607	1054300000	261540000	233830000	272930000	285950000
Stress-70 protein, mitochondrial	HSPA9	7	31	30	27	29	26	29	49	72.4	665	0.80075	0.99679	0.70471	0.89167	14932000000	4030500000	3196200000	4486800000	3218700000
40S ribosomal protein S9	RPS9	5	16	16	16	11	16	11	54.1	22.591	194	0.81108	0.99579	0.89705	1.1255	17306000000	5209000000	4344200000	4105700000	3647000000
Thymocyte nuclear protein 1	THYN1	3	5	5	2	4	2	4	23.1	25.697	225	0.86331	0.99565	0.79709	0.91526	298330000	20141000	17059000	152990000	108140000
RRP12-like protein	RRP12	5	38	38	37	31	37	31	37.4	143.7	1297	0.75207	0.99563	0.6003	0.83068	4426900000	1297600000	959260000	1359500000	810490000
Protein AATF	AATF	1	7	7	5	7	5	7	18	63.132	560	0.81636	0.9955	0.41047	0.50908	211840000	43631000	33756000	89768000	44689000
60S ribosomal protein L15;Ribosomal protein L15	RPL15	6	10	10	7	8	7	8	39.7	24.146	204	0.82535	0.99481	0.79345	0.96127	1897700000	690610000	506920000	375160000	325020000
Replication factor C subunit 1	RFC1	5	30	30	28	28	28	28	31.6	128.18	1147	0.7987	0.99222	0.74271	0.99788	7292600000	1524800000	1301000000	2565700000	1901100000
Zinc finger protein 638	ZNF638	10	19	19	13	14	13	14	12.6	220.62	1978	0.74394	0.99205	0.95783	1.3352	989920000	246340000	225290000	277250000	241040000
DNA topoisomerase 2-beta;DNA topoisomerase 2	TOP2B	4	94	73	86	88	65	68	56.1	182.66	1621	0.7764	0.99183	0.66218	0.8878	57643000000	15320000000	12607000000	17673000000	12043000000
Signal recognition particle subunit SRP68	SRP68	8	20	20	16	17	16	17	38.4	60.284	526	0.70252	0.99111	1.0664	1.2744	1828000000	528400000	428540000	437820000	433240000
RNA-binding motif protein, X-linked 2	RBMX2	3	10	10	10	9	10	9	32.3	37.335	322	0.77833	0.99094	0.79179	1.041	3889500000	895940000	691060000	1255000000	1047600000
DNA-directed RNA polymerase, mitochondrial	POLRMT	2	14	14	12	13	12	13	15.9	138.62	1230	0.76262	0.98898	1.0564	1.4207	964990000	205150000	156830000	276540000	326480000
Zinc finger protein 787	ZNF787	1	3	3	3	3	3	3	8.4	40.428	382	0.74493	0.9887	0.83235	1.095	442820000	229420000	115540000	54423000	43435000
H/ACA ribonucleoprotein complex subunit 3	NOP10	2	5	5	5	4	5	4	71.9	7.7059	64	0.77487	0.98805	0.66238	0.88309	1178400000	458050000	405320000	181690000	133370000
ATP-dependent RNA helicase DDX55	DDX55	7	23	23	19	22	19	22	49.3	68.546	600	0.74642	0.98753	0.72879	0.96937	4329500000	1001500000	807710000	1449300000	1071000000
Signal recognition particle 14 kDa protein	SRP14	2	13	11	12	12	11	10	54.4	14.57	136	0.78466	0.98709	0.72808	0.95098	108600000000	28681000000	23747000000	31993000000	24181000000
40S ribosomal protein S11	RPS11	1	10	10	10	9	10	9	52.5	18.431	158	0.83254	0.98669	0.91283	1.0832	5907400000	1750600000	1431300000	1390900000	1334600000
Zinc finger and BTB domain-containing protein 25	ZBTB25	3	9	9	7	8	7	8	27.4	48.99	435	0.81198	0.98649	0.88674	1.131	1062100000	285680000	236400000	278710000	261310000
G patch domain-containing protein 4	GPATCH4	7	33	33	30	30	30	30	59.4	50.381	446	0.74679	0.98549	0.69168	0.90553	16528000000	4510000000	3627500000	4834900000	3555800000
60S ribosomal protein L13a	RPL13A	3	9	9	8	8	8	8	38.4	23.577	203	0.8243	0.98525	0.77936	0.96996	4338300000	1126900000	942000000	1244500000	1025000000
Nucleolar protein 56	NOP56	5	50	50	47	48	47	48	82.8	66.049	594	0.76645	0.98522	0.80987	1.0528	263640000000	70006000000	56891000000	73016000000	63726000000
Dimethyladenosine transferase 1, mitochondrial	TFB1M	1	16	16	16	14	16	14	52.9	39.542	346	0.8064	0.98462	0.76918	0.97037	4753200000	1321000000	962160000	1448400000	1021600000
60S ribosomal protein L11	RPL11	4	4	4	4	4	4	4	22	20.124	177	0.85523	0.98195	1.0823	1.2266	753010000	214910000	178320000	173590000	186190000
Mediator of DNA damage checkpoint protein 1	MDC1	15	38	38	35	37	35	37	40.3	197.57	1825	0.75563	0.98189	0.64085	0.89576	10251000000	2589700000	2139100000	3228800000	2293500000
Lysine-rich nucleolar protein 1	KNOP1	1	43	43	43	40	43	40	65.3	51.588	458	0.7643	0.98137	0.76667	0.98899	47142000000	13152000000	10016000000	13529000000	10445000000
N-acetyltransferase 10	NAT10	4	76	31	69	75	27	30	72.9	115.73	1025	0.7676	0.98009	0.69512	0.91926	820160000000	225990000000	177820000000	242420000000	173940000000
Unconventional myosin-Ic	MYO1C	6	19	18	18	14	17	14	23.1	118.99	1039	0.73506	0.9797	0.59006	0.84326	1281000000	334850000	302490000	423830000	219860000
Ubiquitin carboxyl-terminal hydrolase 7;Ubiquitin carboxyl-terminal hydrolase	USP7	5	19	19	17	14	17	14	22.1	117	1003	0.76152	0.97927	0.67504	0.89318	1950200000	315670000	800960000	299660000	533890000
UV excision repair protein RAD23 homolog B	RAD23B	3	3	3	2	3	2	3	10.3	43.171	409	0.77868	0.97762	0.43129	0.54528	64261000	14006000	12784000	22195000	15276000
40S ribosomal protein S3a	RPS3A	13	16	16	14	13	14	13	52.3	29.945	264	0.79116	0.97639	0.88345	1.0661	9517600000	2769100000	2146700000	2504400000	2097400000
Peroxiredoxin-6	PRDX6	1	2	2	2	2	2	2	8.9	25.035	224	0.74221	0.97324	0.83698	1.1005	104020000	32663000	30785000	19454000	21117000
N-acetyltransferase 10	NAT10	1	47	2	44	47	2	2	70.5	69.919	617	0.72923	0.97291	0.73777	1.0404	3189800000	676760000	553550000	1096400000	863130000
60S ribosomal protein L26-like 1	RPL26L1	3	13	2	12	12	2	2	53.1	17.256	145	0.78598	0.97215	0.71928	0.90639	448300000	133930000	133350000	104990000	76034000
Surfeit locus protein 6	SURF6	1	15	15	15	14	15	14	44.3	41.45	361	0.73338	0.97146	0.784	1.0051	7654300000	2076500000	1761400000	2090500000	1725900000
RNA-binding protein 28	RBM28	4	20	20	16	16	16	16	29.2	85.737	759	0.77266	0.97141	0.85261	1.1343	1874600000	683380000	322610000	449340000	419260000
DNA repair protein XRCC1	FOXH1;XRCC1	3	10	10	9	6	9	6	18.1	65.964	602	0.80725	0.97035	0.56225	0.73724	554430000	186500000	132830000	154960000	80141000
Nucleolar protein of 40 kDa	ZCCHC17	4	8	8	7	8	7	8	35	27.994	243	0.7749	0.96944	0.75698	0.92239	9760100000	2330600000	1939700000	3091000000	2398900000
Nucleolar protein 12	NOL12	1	10	10	6	10	6	10	49.3	24.663	213	0.83358	0.9683	0.71999	0.9176	2046600000	452050000	343980000	712260000	538300000
Uncharacterized protein C12orf43	C12orf43	9	21	21	18	19	18	19	77.5	28.17	262	0.76953	0.96707	0.67178	0.84649	57158000000	13806000000	10777000000	19153000000	13421000000
60S ribosomal protein L34	RPL34	1	3	3	2	2	2	2	20.5	13.293	117	0.8239	0.96456	0.89985	1.0867	1488400000	493430000	345290000	345380000	304310000
E3 ubiquitin-protein ligase RING1	RING1	3	9	8	7	8	6	7	28.6	42.429	406	0.78562	0.96227	0.7402	0.9722	1044200000	258680000	211680000	324220000	249620000
Atherin	SAMD1	3	22	22	18	20	18	20	53.5	56.051	538	0.74619	0.96207	0.70745	0.94161	14868000000	4137400000	2939300000	4774700000	3016400000
CXXC-type zinc finger protein 1	CXXC1	2	7	7	5	5	5	5	11.7	75.711	656	0.73054	0.95939	1.0574	1.4102	494060000	123680000	105560000	139210000	125610000
Importin subunit alpha-4	KPNA3	3	5	4	5	4	4	3	10.2	57.81	521	0.75957	0.95891	0.6466	0.78579	192090000	54158000	47859000	54988000	35087000
Treacle protein	TCOF1	4	98	0	92	91	0	0	58.6	156.06	1525	0.75888	0.95882	0.69942	0.91382	455800000000	130530000000	106700000000	124610000000	93955000000
ATP-dependent RNA helicase DDX18	DDX18	2	41	41	39	35	39	35	56.3	75.406	670	0.73647	0.95841	0.80508	1.0234	109000000000	28649000000	21769000000	32112000000	26466000000
Protein FAM111A	FAM111A	3	22	22	21	19	21	19	42.9	70.195	611	0.75161	0.95772	0.7387	0.95955	3987300000	1096100000	753260000	1233200000	904710000
Intermediate conductance calcium-activated potassium channel protein 4	KCNN4	1	1	1	1	1	1	1	3.5	47.695	427	0.73581	0.9571	0.52461	0.74937	145210000	44470000	31494000	43665000	25577000
rRNA/tRNA 2-O-methyltransferase fibrillarin-like protein 1	FBLL1	1	6	2	6	6	2	2	18	34.675	333	0.69505	0.95371	0.69591	1.0012	16265000000	4665200000	3432300000	4494200000	3673200000
Pescadillo homolog	PES1	5	16	16	13	16	13	16	29.8	66.077	571	0.6926	0.95309	0.70314	0.92907	3027300000	750350000	645520000	897990000	733480000
Treacle protein	TCOF1	2	97	0	91	90	0	0	59.4	152.2	1489	0.71969	0.95303	0.65129	0.88245	2832700000	950490000	695540000	711110000	475520000
Importin subunit alpha-3	KPNA4	1	6	5	4	5	3	4	20.2	57.886	521	0.7254	0.95274	0.77686	0.94138	330890000	62852000	51879000	129040000	87122000
Serine/threonine-protein phosphatase PP1-beta catalytic subunit;Serine/threonine-protein phosphatase	PPP1CB	4	17	6	16	17	5	6	59.6	37.186	327	0.77341	0.9524	0.65096	0.80228	16813000000	4248800000	3201200000	5593500000	3769900000
NK-tumor recognition protein;Putative peptidyl-prolyl cis-trans isomerase	NKTR	1	2	2	2	2	2	2	1.9	165.67	1462	0.74507	0.95208	0.53247	0.71472	87725000	24556000	18096000	29510000	15563000
Matrin-3	MATR3	11	3	3	3	2	3	2	6.8	88.358	794	0.77995	0.9509	0.73175	0.93468	96730000	28898000	23696000	23831000	20305000
DNA-directed RNA polymerase I subunit RPA34	CD3EAP	1	21	1	19	20	1	1	63.7	54.985	510	0.76571	0.94972	0.59316	0.73434	18209000000	4602400000	3375800000	6143300000	4087700000
Ribosomal RNA processing protein 1 homolog A	RRP1	3	26	26	24	25	24	25	49.9	52.839	461	0.73232	0.94971	0.74289	0.91878	13665000000	3149600000	2603800000	4978700000	2932400000
Three-prime repair exonuclease 1	TREX1	4	12	12	10	11	10	11	48.1	33.212	314	0.76124	0.94949	0.84708	1.0783	2768600000	643490000	617200000	788640000	719230000
p21-activated protein kinase-interacting protein 1	PAK1IP1	1	6	6	4	5	4	5	17.3	43.963	392	0.78782	0.94949	0.73897	0.9209	696240000	117720000	118440000	251350000	208730000
60S ribosomal protein L10a	RPL10A	1	11	11	9	10	9	10	43.3	24.831	217	0.83909	0.94947	0.89478	1.0193	2219900000	600940000	467210000	614350000	537400000
28S ribosomal protein S5, mitochondrial	MRPS5	2	16	16	11	14	11	14	36.7	48.006	430	0.74126	0.94925	0.7621	0.96763	1290400000	315540000	239040000	443830000	292030000
H/ACA ribonucleoprotein complex subunit 2	NHP2	4	8	8	8	8	8	8	75.2	17.201	153	0.75182	0.94921	0.63561	0.79607	16478000000	4530000000	3500200000	5096600000	3351500000
H/ACA ribonucleoprotein complex subunit 1	GAR1	2	10	10	7	8	7	8	45.2	20.834	199	0.83668	0.94879	0.67237	0.82226	32588000000	9335500000	7963600000	8757700000	6530900000
SPATS2-like protein	SPATS2L	10	31	3	26	28	2	3	61.1	61.728	558	0.74061	0.94869	0.83931	1.0801	31568000000	7961800000	6142600000	9269200000	8193900000
EF-hand calcium-binding domain-containing protein 11	EFCAB11	8	8	8	6	5	6	5	39.9	19.225	163	0.75572	0.94762	0.78985	0.89375	552690000	157430000	138930000	136170000	120160000
Heterogeneous nuclear ribonucleoprotein H;Heterogeneous nuclear ribonucleoprotein H, N-terminally processed;Heterogeneous nuclear ribonucleoprotein F;Heterogeneous nuclear ribonucleoprotein F, N-terminally processed;Heterogeneous nuclear ribonucleoprotein H2;Heterogeneous nuclear ribonucleoprotein H2, N-terminally processed	HNRNPH1;HNRNPF;HNRNPH2	16	3	3	3	3	3	3	15.9	30.383	277	0.72003	0.94656	0.83438	1.1012	214940000	63712000	65333000	42899000	42992000
DNA-dependent protein kinase catalytic subunit	PRKDC	3	24	24	18	18	18	18	6.5	465.38	4096	0.73181	0.94641	0.49605	0.70519	743170000	213750000	190470000	218240000	120710000
Protein LYRIC	MTDH	3	7	7	6	5	6	5	15.8	63.836	582	0.78674	0.94161	0.82768	1.0209	340020000	77822000	61718000	109930000	90543000
E3 ubiquitin-protein ligase TRIP12	TRIP12	8	56	6	52	52	6	5	34.5	225.52	2040	0.72502	0.94128	0.75671	1.0353	13408000000	3645000000	2844000000	3894700000	3024600000
60S ribosomal protein L19	RPL19	1	13	13	13	9	13	9	41.3	23.466	196	0.74313	0.94022	0.81845	0.99537	64865000000	24270000000	19563000000	11286000000	9745900000
RNA-binding protein 34	RBM34	5	24	24	22	21	22	21	49.5	48.564	430	0.75085	0.94021	0.75959	0.99189	7870200000	2184100000	1681500000	2289400000	1715200000
rRNA 2-O-methyltransferase fibrillarin	FBL	1	26	22	24	26	20	22	64.2	33.784	321	0.7486	0.94012	0.79652	1.0247	112470000000	28097000000	22212000000	33377000000	28779000000
60S ribosomal protein L29	RPL29	1	2	2	2	2	2	2	14.5	17.752	159	0.82051	0.93944	0.79074	0.89507	4068900000	1169800000	902330000	1140600000	856120000
Replication factor C subunit 4	RFC4	8	17	17	16	16	16	16	54.8	39.681	363	0.72736	0.93941	0.67668	0.87522	4923800000	1300000000	939230000	1607100000	1077400000
Myosin regulatory light chain 12A;Myosin regulatory light chain 12B	MYL12A;MYL12B	2	8	3	5	8	2	3	62.6	19.794	171	0.73321	0.93904	0.5386	0.66826	1490600000	318550000	210120000	592900000	369000000
Heterochromatin protein 1-binding protein 3	HP1BP3	9	21	21	21	19	21	19	47.2	61.206	553	0.7104	0.93889	0.78733	1.0383	19943000000	5648400000	4083400000	5578100000	4633600000
Histone H1.1	HIST1H1A	1	18	9	18	16	9	8	48.8	21.842	215	0.74568	0.93775	0.79789	0.99649	23237000000	4069100000	3264000000	8503100000	7401000000
Peptidyl-prolyl cis-trans isomerase G;Peptidyl-prolyl cis-trans isomerase	PPIG	8	11	11	9	8	9	8	29.5	51.715	448	0.7319	0.93692	0.85457	1.0041	3074800000	781730000	611010000	891860000	790180000
60S ribosomal protein L18	RPL18	7	5	5	5	5	5	5	35.4	18.756	164	0.776	0.93666	0.79188	0.97053	1563200000	462660000	357330000	417890000	325340000
Retinitis pigmentosa 9 protein	RP9	2	8	8	8	7	8	7	42.5	26.106	221	0.76013	0.93573	0.81848	0.96155	3312800000	946240000	737360000	902790000	726450000
DNA topoisomerase 2-alpha	TOP2A	7	107	86	102	102	81	82	60.4	178.88	1568	0.73594	0.93557	0.58768	0.77658	272550000000	73701000000	56021000000	88303000000	54525000000
Krueppel-like factor 13	KLF13	2	13	13	12	11	12	11	47.9	31.18	288	0.70846	0.93487	0.89835	1.1863	3095000000	742040000	509560000	990870000	852520000
Histone H2A type 2-C;Histone H2A type 2-A;Histone H2A type 1-J;Histone H2A type 1-H;Histone H2A.J;Histone H2A type 1-D;Histone H2A type 1;Histone H2A;Histone H2A type 1-C;Histone H2A type 3;Histone H2A type 1-B/E	HIST2H2AC;HIST2H2AA3;HIST1H2AJ;HIST1H2AH;H2AFJ;HIST1H2AD;HIST1H2AG;HIST1H2AC;HIST3H2A;HIST1H2AB	13	5	3	4	5	2	3	58.1	13.988	129	0.73089	0.93466	0.65244	0.8575	58577000000	13451000000	9751100000	20639000000	14736000000
Histone H2A.V;Histone H2A.Z;Histone H2A	H2AFV;H2AFZ	7	5	3	4	5	2	3	53.9	13.509	128	0.79804	0.93451	0.69027	0.80387	3109200000	892600000	672730000	896390000	647520000
Protein AF-10	MLLT10	5	1	1	1	1	1	1	1.3	107.2	1011	0.76326	0.93438	0.81897	0.9997	2253100000	654140000	503750000	606880000	488290000
Barrier-to-autointegration factor;Barrier-to-autointegration factor, N-terminally processed	BANF1	1	3	3	3	2	3	2	40.4	10.058	89	0.71258	0.93373	0.75693	0.98592	2355800000	895520000	725840000	398640000	335770000
Nucleolar GTP-binding protein 2	GNL2	3	28	28	26	24	26	24	38.3	83.654	731	0.71665	0.933	0.93626	1.2419	7543700000	2038700000	1474800000	2005400000	2024800000
Cellular nucleic acid-binding protein	CNBP	7	8	8	6	8	6	8	55.3	18.742	170	0.74937	0.93265	0.92913	1.2336	587200000	140000000	141450000	154510000	151240000
Actin, alpha skeletal muscle;Actin, alpha cardiac muscle 1;Actin, gamma-enteric smooth muscle;Actin, aortic smooth muscle	ACTA1;ACTC1;ACTG2;ACTA2	16	13	2	12	13	1	2	32.6	42.051	377	0.76224	0.93158	0.53065	0.63376	752100000	168690000	141520000	287930000	153970000
Lysine-specific demethylase PHF2	PHF2	8	12	12	11	11	11	11	15.2	120.77	1096	0.74834	0.93109	0.66665	0.86387	2512800000	550140000	396090000	1100800000	465810000
Activated RNA polymerase II transcriptional coactivator p15	SUB1	4	4	4	2	4	2	4	44.9	14.395	127	0.75602	0.93051	0.67438	0.86688	905940000	259700000	206000000	238650000	201580000
Alpha-actinin-1	ACTN1	16	12	8	9	10	5	6	16.2	102.71	887	0.72601	0.92964	0.81267	1.1479	561000000	141560000	117050000	149240000	153160000
Centromere protein U	CENPU	6	7	7	5	6	5	6	20.1	47.521	418	0.66689	0.92952	0.51856	0.68392	279790000	78061000	46338000	92301000	63089000
Nucleophosmin	NPM1	5	7	7	7	7	7	7	32.8	28.4	259	0.7445	0.92883	0.75003	0.93901	2215400000	689150000	522220000	619350000	384640000
60S ribosomal protein L31	RPL31	7	8	8	7	7	7	7	52.8	14.463	125	0.75871	0.92818	0.85817	1.0422	19543000000	6303800000	4966200000	4449900000	3822700000
Leydig cell tumor 10 kDa protein homolog	C19orf53	1	4	4	3	4	3	4	17.2	10.576	99	0.72939	0.92801	0.74462	0.97766	1198800000	425730000	313900000	258850000	200310000
Nucleoside diphosphate kinase;Nucleoside diphosphate kinase B;Putative nucleoside diphosphate kinase	NME1-NME2;NME2;NME2P1	4	3	1	1	3	0	1	23.3	32.642	292	0.71282	0.92799	0.71623	0.92068	128470000	18922000	14964000	50641000	43947000
Thyroid transcription factor 1-associated protein 26	CCDC59	2	12	12	11	11	11	11	37.8	28.669	241	0.74253	0.92761	0.72864	0.90615	2777800000	725490000	508100000	879810000	664370000
28S ribosomal protein S15, mitochondrial	MRPS15	1	4	4	4	3	4	3	13.6	29.842	257	0.72856	0.92759	0.7344	0.91452	264100000	80093000	72629000	69586000	41793000
rRNA-processing protein UTP23 homolog	UTP23	6	8	8	6	7	6	7	50.2	28.402	249	0.77278	0.92738	0.70347	0.88568	2832300000	714700000	650040000	814130000	653460000
Myosin-14	MYH14	9	7	2	7	6	2	1	3.8	231.21	2028	0.76793	0.92724	0.51046	0.63167	763540000	237860000	190950000	216090000	118650000
Probable dimethyladenosine transferase	DIMT1	2	16	16	14	12	14	12	59.1	35.236	313	0.75416	0.92704	0.78495	0.9477	3504400000	1057100000	817240000	908940000	721140000
39S ribosomal protein L22, mitochondrial	MRPL22	4	9	9	4	9	4	9	42.5	24.325	212	0.72338	0.92672	0.68353	0.88465	517110000	125260000	96736000	168700000	126420000
40S ribosomal protein S5;40S ribosomal protein S5, N-terminally processed	RPS5	1	8	8	5	8	5	8	35.3	22.876	204	0.82028	0.9265	0.58429	0.72685	1041400000	204350000	168930000	392220000	275920000
DnaJ homolog subfamily C member 9	DNAJC9	1	20	20	19	16	19	16	68.5	29.909	260	0.76114	0.92438	0.73632	0.88911	33634000000	10082000000	7750800000	9101900000	6699100000
Histone H3.2;Histone H3;Histone H3.1t;Histone H3.3;Histone H3.1;Histone H3.3C	HIST2H3A;H3F3A;HIST3H3;HIST1H3A;H3F3C	6	4	2	4	2	2	1	40.4	15.388	136	0.63066	0.92358	0.60229	0.68152	11017000000	4257500000	2928200000	2384900000	1446200000
60S ribosomal protein L6	RPL6	6	17	17	17	15	17	15	61.1	25.892	226	0.73445	0.92207	0.70204	0.89159	26564000000	8192300000	5948900000	7479800000	4943400000
Nucleolar protein 7	NOL7	2	10	10	7	10	7	10	30	29.426	257	0.79136	0.92152	0.68044	0.85761	2136800000	549330000	441920000	660460000	485140000
DNA-directed RNA polymerase I subunit RPA34	CD3EAP	1	21	1	19	20	1	1	63.9	55.171	512	0.69582	0.92045	0.71893	0.94407	163890000	55353000	38258000	38420000	31859000
60S ribosomal protein L23	RPL23	3	7	7	7	7	7	7	50	14.865	140	0.77944	0.92011	0.82706	0.99713	8256500000	2325200000	1986600000	1967500000	1977200000
Unconventional myosin-Ie	MYO1E	4	4	4	3	4	3	4	4.7	127.06	1108	0.79204	0.91678	0.51322	0.65404	143350000	32250000	22618000	60574000	27905000
Myosin-9	MYH9	14	99	88	86	87	75	77	51.5	226.53	1960	0.7142	0.91592	0.52623	0.6958	37901000000	9981500000	7307000000	13349000000	7263500000
	LOC102288414	2	2	2	1	2	1	2	21.2	11.6	99	0.71613	0.91527	0.71872	0.90984	13831000000	3778800000	2855300000	4031900000	3165400000
U3 small nucleolar ribonucleoprotein protein IMP4	IMP4	6	14	14	14	13	14	13	45	31.835	280	0.67661	0.91317	0.68931	0.93134	5798300000	1646500000	1134300000	1767700000	1249800000
Nucleolin	NCL	7	26	26	26	24	26	24	33.2	76.613	710	0.73855	0.91253	0.98904	1.2369	21966000000	6240300000	4623900000	5536800000	5564700000
40S ribosomal protein S4, X isoform	RPS4X	6	18	18	17	15	17	15	60.1	29.597	263	0.74874	0.9122	0.99447	1.1965	19825000000	4907500000	4857000000	4995900000	5064100000
Annexin A2;Annexin;Putative annexin A2-like protein	ANXA2;ANXA2P2	26	11	11	10	11	10	11	34.8	38.604	339	0.68924	0.91212	0.69404	0.88379	1358900000	287930000	212120000	391090000	467750000
Multiple myeloma tumor-associated protein 2	MMTAG2	4	13	13	12	10	12	10	48.3	29.411	263	0.73663	0.91176	0.76502	0.96871	13252000000	4293000000	3293900000	3214400000	2451000000
Poly(U)-binding-splicing factor PUF60	PUF60	12	5	5	5	3	5	3	16.6	54.024	499	0.68803	0.91098	0.85127	1.0509	218660000	69750000	60232000	49007000	39666000
Unconventional myosin-Va	MYO5A	18	20	20	15	18	15	18	13.7	215.04	1852	0.70759	0.91048	0.50224	0.69505	1776100000	349220000	281810000	662940000	482100000
pre-rRNA processing protein FTSJ3	FTSJ3	1	25	25	25	23	25	23	44.7	96.557	847	0.6859	0.9089	0.56432	0.77899	8503100000	2446000000	1520100000	2918400000	1618600000
Probable ATP-dependent RNA helicase DDX27	DDX27	2	31	31	30	29	30	29	43	89.834	796	0.7099	0.90834	0.69018	0.95416	22607000000	6324000000	4750300000	6670700000	4862200000
Lethal(3)malignant brain tumor-like protein 3	L3MBTL3	4	29	28	29	28	28	27	46.6	85.756	755	0.71526	0.90821	0.71913	0.94878	17292000000	4810400000	3623300000	5115100000	3743500000
ATP-dependent RNA helicase DDX24	DDX24	6	44	14	42	42	12	14	66.4	96.331	859	0.69888	0.90648	0.68968	0.90209	37270000000	11154000000	7769200000	10976000000	7370400000
Pyruvate kinase PKM	PKM	9	41	41	37	38	37	38	81.5	57.936	531	0.68451	0.90525	0.77605	1.0123	52902000000	13685000000	9655000000	16689000000	12873000000
Interferon-stimulated 20 kDa exonuclease-like 2	ISG20L2	1	8	8	8	7	8	7	27.2	39.153	353	0.74516	0.90389	0.80355	0.96178	928280000	265010000	182830000	253230000	227210000
Putative oxidoreductase GLYR1	GLYR1	5	17	17	16	15	16	15	43.5	58.636	536	0.7345	0.90209	0.71165	0.94404	3134000000	762690000	532950000	992400000	845930000
ADP-ribosylation factor-like protein 6-interacting protein 4	ARL6IP4	10	5	5	5	5	5	5	26.5	23.687	211	0.74594	0.90206	0.76827	0.95737	3218000000	890230000	661560000	895120000	771060000
Polycomb group RING finger protein 1	PCGF1	2	10	10	8	9	8	9	47.5	30.346	259	0.79477	0.90128	0.72778	0.84861	3388500000	865780000	683200000	1093900000	745540000
Peptidyl-prolyl cis-trans isomerase B	PPIB	1	4	4	2	4	2	4	19.9	23.742	216	0.79877	0.90123	0.7276	0.82466	378600000	92803000	65241000	126110000	94447000
60S ribosomal protein L14	RPL14	3	5	5	5	4	5	4	42.7	14.558	124	0.72822	0.89978	0.72696	0.87511	1619400000	415390000	287120000	535600000	381280000
Probable ATP-dependent RNA helicase DDX52	DDX52	4	26	26	24	24	24	24	49.7	67.497	599	0.68206	0.89934	0.87435	1.1316	20754000000	5384800000	3744300000	6237600000	5387500000
Dolichyl-diphosphooligosaccharide--protein glycosyltransferase 48 kDa subunit	DDOST	2	3	3	3	2	3	2	6.8	50.8	456	0.70448	0.89913	0.72714	0.9542	62324000	19872000	14689000	13555000	14208000
Probable ATP-dependent RNA helicase DHX37	DHX37	2	18	18	14	14	14	14	18.1	129.54	1157	0.69278	0.89602	0.76025	1.0829	1029800000	324740000	228360000	263430000	213300000
Serine/threonine-protein phosphatase;Serine/threonine-protein phosphatase PP1-gamma catalytic subunit;Serine/threonine-protein phosphatase PP1-alpha catalytic subunit	PPP1CC;PPP1CA	16	16	5	16	16	5	5	59.2	34.95	304	0.67151	0.89573	0.65817	0.84478	5589900000	1298800000	974480000	2018900000	1297700000
Nucleolar and coiled-body phosphoprotein 1	NOLC1	3	24	24	20	21	20	21	37.5	74.746	709	0.67393	0.8947	0.70718	0.96824	12899000000	4049700000	2823800000	3561300000	2464200000
Corepressor interacting with RBPJ 1	CIR1	3	16	16	15	13	15	13	36.2	52.313	450	0.68198	0.89441	0.69232	0.92576	6750100000	1866800000	1089100000	2252900000	1541300000
ATP-binding cassette sub-family F member 2	ABCF2	3	3	3	2	3	2	3	5	71.289	623	0.73429	0.89187	0.79846	0.96763	160700000	36845000	26379000	58513000	38960000
CXXC-type zinc finger protein 5	CXXC5	12	4	4	3	4	3	4	15.8	32.977	322	0.75243	0.88974	0.84149	0.87021	353030000	72084000	54664000	130020000	96257000
Heterogeneous nuclear ribonucleoprotein Q	SYNCRIP	6	7	3	5	7	2	3	15.6	58.735	527	0.734	0.88954	0.95658	1.1635	161700000	26763000	25627000	63217000	46094000
GTP-binding nuclear protein Ran	RAN	5	4	4	4	4	4	4	17.2	26.224	233	0.75608	0.88889	0.77935	0.94968	233530000	74987000	60940000	55189000	42416000
Zinc finger protein 37 homolog	ZFP37	5	4	4	4	4	4	4	5.7	71.209	630	0.67292	0.88867	0.70565	0.92571	160310000	50514000	39839000	34948000	35010000
Rab11 family-interacting protein 2	RAB11FIP2	6	11	11	11	9	11	9	28.7	58.278	512	0.69967	0.8864	0.728	0.95934	693950000	229870000	160290000	176660000	127120000
60S ribosomal protein L4	RPL4	4	20	20	18	20	18	20	48	45.498	406	0.70685	0.88605	0.72212	0.91822	45009000000	12783000000	8833500000	13750000000	9642000000
U3 small nucleolar ribonucleoprotein protein IMP3	IMP3	2	11	11	9	11	9	11	66.3	21.85	184	0.70848	0.88472	0.72109	0.88804	6124300000	1596400000	1081100000	2036100000	1410700000
Microtubule-associated protein 1A;MAP1A heavy chain;MAP1 light chain LC2	MAP1A	4	35	32	29	32	26	29	12.9	331.25	3041	0.70283	0.8828	0.67956	0.84169	35918000000	9719500000	7162400000	11495000000	7541000000
Sentrin-specific protease 5	SENP5	2	2	2	1	2	1	2	3.2	81.309	709	0.73758	0.88219	1.6016	1.8989	56280000	16583000	13365000	11946000	14385000
Serine/threonine-protein kinase MARK2	MARK2	29	7	5	5	6	4	4	10.4	78.452	699	0.73898	0.88109	1.003	1.2408	300370000	72547000	43894000	107540000	76393000
Ribosomal L1 domain-containing protein 1	RSL1D1	2	28	28	25	25	25	25	51.6	54.972	490	0.67445	0.87687	0.93702	1.1894	22158000000	6130200000	4402500000	5970400000	5655300000
Tropomyosin alpha-1 chain	TPM1	5	7	2	5	6	1	2	20.8	28.524	245	0.67157	0.87501	0.47603	0.60984	85281000	26607000	14941000	30320000	13413000
Histone H4	HIST1H4A	1	6	6	6	6	6	6	51.5	11.367	103	0.73305	0.87442	0.69058	0.87853	16262000000	4575800000	3361000000	4967100000	3357900000
Death domain-associated protein 6	DAXX	2	13	1	12	12	1	1	29.9	81.372	740	0.65493	0.87438	0.6941	0.99127	2517600000	681800000	458570000	766280000	610990000
Bifunctional lysine-specific demethylase and histidyl-hydroxylase MINA	MINA	6	10	10	9	7	9	7	30.5	52.8	465	0.69406	0.87251	0.68166	0.84973	979930000	252630000	187510000	330980000	208810000
Band 4.1-like protein 4B	EPB41L4B	4	5	3	3	5	2	3	11.8	51.389	440	0.68126	0.87074	0.80973	1.0687	114080000	23970000	13065000	45255000	31793000
DNA-3-methyladenine glycosylase	MPG	5	14	14	10	13	10	13	63.7	30.824	281	0.68021	0.87056	0.76822	0.97704	6832800000	1519300000	1407400000	1742200000	2163800000
Spermatogenesis-associated serine-rich protein 2	SPATS2	6	18	18	18	17	18	17	42.9	59.544	545	0.70417	0.86445	0.7992	0.97482	3217900000	941440000	655840000	879390000	741200000
High mobility group protein B1;Putative high mobility group protein B1-like 1	HMGB1;HMGB1P1	6	6	4	5	4	3	3	31	18.311	158	0.71754	0.86297	1.1184	1.3815	266750000	59300000	42315000	87761000	77377000
Ribosome biogenesis protein BRX1 homolog	BRIX1	1	23	23	22	20	22	20	64.6	41.401	353	0.65762	0.86272	0.6079	0.78558	30488000000	9235100000	6172800000	9045000000	6034900000
Probable ribosome biogenesis protein RLP24	RSL24D1	1	4	4	3	4	3	4	21.5	19.621	163	0.70616	0.86148	0.74212	0.84058	524570000	164950000	120210000	137500000	101920000
60S ribosomal protein L18a	RPL18A	2	8	8	7	7	7	7	43.2	20.762	176	0.71681	0.85923	0.92784	1.1155	1471900000	394750000	296260000	391410000	389460000
General transcription factor 3C polypeptide 5	GTF3C5	9	9	9	8	7	8	7	26.9	52.29	457	0.64626	0.8563	0.5968	0.77072	2178500000	119140000	79760000	142720000	1836900000
Nucleolar RNA helicase 2	DDX21	3	59	57	56	57	54	55	70	87.343	783	0.68215	0.85552	0.85357	1.1145	429200000000	116020000000	80655000000	122400000000	110120000000
Ribosomal RNA processing protein 1 homolog B	RRP1B	3	54	54	49	51	49	51	72	82.175	740	0.6748	0.8553	0.71218	0.92313	230770000000	60622000000	46762000000	68311000000	55078000000
UPF0711 protein C18orf21	C18orf21	2	5	5	2	4	2	4	22.7	24.826	220	0.69332	0.85385	0.68854	0.82801	61735000	6710700	5022600	28728000	21274000
Dual specificity protein kinase CLK3	CLK3	4	9	9	6	6	6	6	28	58.588	490	0.65019	0.85335	0.63647	0.83451	428790000	151340000	102380000	106350000	68727000
Treacle protein	TCOF1	6	91	0	86	85	0	0	57.5	152.3	1488	0.66365	0.85311	0.61143	0.82847	1081800000	300930000	185820000	355310000	239730000
Holliday junction recognition protein	HJURP	5	11	11	10	10	10	10	18.7	83.538	748	0.62728	0.85303	0.62013	0.85034	671250000	190400000	114670000	222710000	143470000
Protein SDA1 homolog	SDAD1	5	24	24	22	23	22	23	37.1	79.87	687	0.68904	0.85293	0.60161	0.7569	8022700000	2109300000	1474600000	2691200000	1747600000
40S ribosomal protein S15	RPS15	1	4	4	3	4	3	4	32.4	17.04	145	0.66365	0.85215	0.70483	0.86553	352240000	66118000	37557000	129570000	119000000
Nucleolar protein 16	NOP16	7	10	10	9	6	9	6	55.1	21.188	178	0.66255	0.84907	0.79146	0.9858	1480200000	491400000	352040000	355020000	281750000
Probable rRNA-processing protein EBP2	EBNA1BP2	1	18	18	17	18	17	18	48.4	34.852	306	0.64123	0.84903	0.63913	0.84586	16037000000	4841300000	3149200000	4858300000	3188300000
ATP-dependent RNA helicase DDX50	DDX50	2	40	38	33	37	31	35	66	79.946	711	0.65779	0.84705	0.94161	1.2455	15307000000	4101600000	2762800000	4314900000	4128200000
Guanine nucleotide-binding protein-like 3	GNL3	8	33	33	32	32	32	32	55.5	60.54	537	0.67687	0.84477	0.6458	0.8212	62491000000	17267000000	11919000000	20211000000	13093000000
Protein SPT2 homolog	SPTY2D1	4	3	3	3	3	3	3	4.8	74.229	673	0.64221	0.84242	1.0553	1.3316	206880000	77999000	40450000	38899000	49536000
Zinc finger protein 512B	ZNF512B	1	35	35	28	29	28	29	41.3	97.263	892	0.65024	0.84161	0.6225	0.88932	6758600000	1609500000	1604700000	1774400000	1770000000
60S ribosomal protein L8	RPL8	7	13	13	12	11	12	11	55.6	28.024	257	0.67439	0.83867	0.70448	0.8513	12985000000	3927900000	2616900000	3640100000	2800100000
Alpha-actinin-4	ACTN4	9	9	5	6	9	2	5	15.4	104.85	911	0.64017	0.83812	0.52765	0.76479	120250000	24507000	17766000	52937000	25038000
E3 ubiquitin-protein ligase ZFP91	ZFP91	2	11	11	11	5	11	5	29.1	59.57	529	0.63745	0.83499	0.58391	0.7579	1016900000	469830000	380920000	100910000	65225000
S-phase kinase-associated protein 1	SKP1	7	6	6	5	4	5	4	49.7	18.658	163	0.65482	0.83497	0.82811	1.0012	655090000	176960000	113640000	192700000	171790000
Probable U3 small nucleolar RNA-associated protein 11	UTP11L	2	7	7	7	5	7	5	23.7	30.446	253	0.74169	0.83477	0.75759	0.87942	579030000	170200000	116490000	163140000	129200000
L-lactate dehydrogenase A chain	LDHA	24	8	7	8	7	7	6	27.1	36.688	332	0.69257	0.83299	0.76032	0.91691	1040300000	234500000	235010000	292130000	278680000
Elongation factor 1-gamma	EEF1G	4	4	4	3	4	3	4	16.5	24.104	206	0.67755	0.83185	0.57285	0.76099	257210000	55802000	37984000	104500000	58926000
Propionyl-CoA carboxylase alpha chain, mitochondrial	PCCA	9	13	13	12	8	12	8	23.2	77.047	702	0.64025	0.83058	0.93619	1.1409	570340000	161860000	114630000	145610000	148240000
40S ribosomal protein S13	RPS13	2	9	9	7	9	7	9	57	17.222	151	0.64903	0.82977	0.64933	0.83624	24537000000	7355400000	4715100000	7382800000	5083800000
Protein LLP homolog	LLPH	1	4	4	4	4	4	4	29.5	15.225	129	0.67467	0.82878	0.78714	0.96103	2454300000	991310000	736390000	400420000	326220000
Histone H2B type 1-M;Histone H2B type 1-N;Histone H2B type 1-H;Histone H2B type 2-F;Histone H2B type 1-C/E/F/G/I;Histone H2B type 1-D;Histone H2B;Histone H2B type 1-L;Histone H2B type 1-K;Histone H2B type 1-A	HIST1H2BM;HIST1H2BN;HIST1H2BH;HIST2H2BF;HIST1H2BC;HIST1H2BD;HIST1H2BL;HIST1H2BK;HIST1H2BA	11	12	0	7	12	0	0	68.3	13.989	126	0.69688	0.82759	0.70295	0.91023	39789000000	13933000000	10892000000	8604100000	6360900000
Eukaryotic translation initiation factor 6	EIF6	5	10	10	8	9	8	9	60	26.599	245	0.6725	0.82605	0.71691	0.90528	3830300000	1062900000	721220000	1162700000	883460000
Protein disulfide-isomerase;Protein disulfide-isomerase A3	PDIA3	4	5	5	5	3	5	3	11.2	54.102	480	0.68485	0.82339	0.60623	0.79728	225450000	75172000	55490000	61016000	33769000
Tubulin beta chain;Tubulin beta-2B chain;Tubulin beta-2A chain	TUBB;TUBB2B;TUBB2A	27	15	2	13	15	2	2	44.6	47.766	426	0.62018	0.82325	0.59294	0.79746	4198500000	1194200000	796000000	1330600000	877720000
Pre-mRNA-splicing factor CWC25 homolog	CWC25	3	18	18	15	13	15	13	36.2	49.647	425	0.64281	0.82227	0.78288	1.0273	3568000000	1055600000	679110000	1007400000	825930000
rRNA-processing protein FCF1 homolog	FCF1	4	6	6	5	6	5	6	31.1	21.491	183	0.65461	0.81753	0.73583	0.89572	743120000	237470000	200110000	169730000	135810000
Antigen KI-67	MKI67	3	203	20	187	196	18	19	68.4	358.62	3255	0.64064	0.8175	0.56416	0.74291	331620000000	93937000000	63213000000	107170000000	67295000000
Smad nuclear-interacting protein 1	SNIP1	2	5	5	5	3	5	3	18.2	43.948	380	0.59666	0.81517	1.0726	1.4135	236160000	88015000	45268000	47368000	55511000
PIN2/TERF1-interacting telomerase inhibitor 1	PINX1	7	10	10	8	9	8	9	36.6	37.034	328	0.66374	0.81466	0.679	0.82604	1442400000	416060000	327590000	402910000	295890000
Zinc finger and BTB domain-containing protein 7A	ZBTB7A	1	19	19	17	18	17	18	46.6	61.438	584	0.63738	0.81402	0.73956	0.96901	41211000000	11719000000	7432700000	12713000000	9347000000
Zinc finger protein 740	ZNF740	1	5	5	2	4	2	4	34.7	21.857	193	0.64658	0.81322	0.8196	0.93545	127450000	17086000	13613000	52113000	44639000
Microtubule-associated protein 1B;MAP1B heavy chain;MAP1 light chain LC1	MAP1B	5	20	17	14	20	11	17	11.8	270.63	2468	0.66824	0.81312	0.62938	0.8013	2384800000	552790000	449520000	890620000	491860000
U3 small nucleolar ribonucleoprotein protein MPP10	MPHOSPH10	2	22	22	17	21	17	21	38.2	78.863	681	0.6169	0.81285	0.64481	0.88427	10157000000	2686400000	1678500000	3577200000	2214600000
Histone H2B type 2-E;Histone H2B type 1-B;Histone H2B type 1-O;Histone H2B type 1-J;Histone H2B type 3-B	HIST2H2BE;HIST1H2BB;HIST1H2BO;HIST1H2BJ;HIST3H2BB	5	12	0	7	12	0	0	68.3	13.92	126	0.66702	0.81255	0.70469	0.85325	2162400000	445500000	353070000	773970000	589820000
Myosin light polypeptide 6	PDE6H;MYL6	15	7	7	7	7	7	7	50.3	16.29	145	0.6841	0.81188	0.49849	0.62759	2093300000	693270000	510350000	567750000	321930000
Probable ATP-dependent RNA helicase DDX31	DDX31	6	32	32	24	28	24	28	48.5	80.945	722	0.65255	0.80771	0.79025	1.0274	5138700000	1182900000	744800000	1782500000	1428500000
Ankycorbin	RAI14	12	12	12	9	12	9	12	14	109.16	973	0.61256	0.80585	0.41325	0.57274	596160000	142240000	88330000	257980000	107610000
Ribosomal RNA-processing protein 8	RRP8	3	14	14	12	12	12	12	37.3	50.714	456	0.62763	0.8055	0.79694	0.97247	2204400000	714840000	465760000	554890000	468880000
POZ-, AT hook-, and zinc finger-containing protein 1	PATZ1	4	6	5	5	4	4	3	16.2	57.601	537	0.64886	0.80527	0.62161	0.79431	173630000	64115000	40275000	39552000	29687000
Protein RRP5 homolog	PDCD11	1	2	2	2	2	2	2	1.1	208.7	1871	0.65964	0.80489	0.81785	1.0758	96458000	21193000	19313000	31189000	24763000
RNA exonuclease 4	REXO4	2	13	13	12	12	12	12	37.2	46.671	422	0.66886	0.80478	0.65095	0.81437	1947700000	548570000	349960000	578930000	470260000
Probable ATP-dependent RNA helicase DDX41	DDX41	5	51	51	47	50	47	50	77.5	69.837	622	0.62764	0.8047	0.695	0.9064	66730000000	19573000000	12355000000	20664000000	14138000000
Profilin-1	PFN1	2	5	5	4	4	4	4	44.3	15.054	140	0.6807	0.80441	0.77381	0.90096	1027400000	276420000	211710000	305790000	233500000
Aspartyl/asparaginyl beta-hydroxylase	ASPH	4	17	17	14	14	14	14	27	83.267	729	0.60476	0.80247	1.1037	1.4593	2401500000	663790000	477180000	611460000	649060000
Transcription elongation factor B polypeptide 1	TCEB1	4	3	3	3	3	3	3	40.4	9.9601	89	0.67701	0.80018	1.0515	1.2581	267760000	87836000	63669000	59762000	56498000
N-acylneuraminate cytidylyltransferase	CMAS	4	12	12	10	11	10	11	33.4	48.379	434	0.63484	0.79938	0.78405	0.99238	1251600000	390880000	246270000	349240000	265190000
Helicase-like transcription factor	HLTF	4	37	37	33	31	33	31	41.4	113.93	1009	0.60084	0.7965	0.77658	1.0866	6798200000	2134800000	1313700000	1860200000	1489500000
Something about silencing protein 10	UTP3	1	16	16	13	14	13	14	32.6	54.557	479	0.62233	0.79471	0.59468	0.81434	5202200000	1437300000	957180000	1556800000	1251000000
Tubulin alpha-1B chain;Tubulin alpha-4A chain	TUBA1B;TUBA4A;KLK9	26	13	1	13	10	1	1	36.4	50.151	451	0.61747	0.79465	0.62796	0.81529	6244000000	1782100000	1197100000	1855300000	1409400000
Vascular endothelial zinc finger 1	VEZF1	3	18	17	16	15	15	14	44.5	56.931	521	0.61958	0.79287	1.2063	1.4728	17947000000	5570500000	3530800000	3984200000	4861000000
Dolichol-phosphate mannosyltransferase subunit 1	DPM1	6	4	4	2	4	2	4	26.7	28.76	255	0.64422	0.78857	0.84143	1.0753	128350000	22824000	15883000	51227000	38416000
Melanoma-associated antigen D2	MAGED2	14	3	3	3	3	3	3	9	55.795	521	0.60592	0.78662	0.65302	0.86112	127530000	31648000	20055000	53307000	22524000
Coiled-coil domain-containing protein 106	CCDC106	1	4	4	3	3	3	3	17.9	32.032	280	0.60759	0.78373	0.68162	0.82851	275530000	78830000	54623000	83417000	58658000
RNA-binding protein 14	RBM14	8	9	9	6	8	6	8	15.8	69.491	669	0.52765	0.78232	0.65764	0.94612	261830000	62124000	37998000	85433000	76272000
Tropomyosin alpha-4 chain	TPM4	2	9	4	6	9	3	4	33.9	28.521	248	0.59756	0.77874	0.43808	0.54021	399370000	59344000	36062000	94742000	209230000
Polynucleotide 5-hydroxyl-kinase NOL9	NOL9	1	16	16	14	15	14	15	29.3	79.322	702	0.58896	0.77721	0.634	0.8322	2547600000	704570000	416310000	831740000	594970000
Histone H1.3	HIST1H1D	1	20	3	19	18	3	2	49.3	22.35	221	0.68366	0.77622	0.67153	0.7776	10864000000	771300000	595740000	5643500000	3853700000
Pyruvate carboxylase, mitochondrial	PC	4	35	35	31	28	31	28	41.5	129.63	1178	0.57943	0.77487	0.97682	1.3338	5813900000	1660400000	1001100000	1629500000	1522900000
Cyclin-K	CCNK	11	4	4	3	3	3	3	10.7	66.109	600	0.61978	0.77296	0.81484	0.99712	202060000	78793000	38419000	46514000	38332000
Filamin-A	FLNA	9	19	17	14	16	12	14	10.7	280.01	2639	0.60774	0.77027	0.6828	0.85376	783650000	206140000	129170000	284950000	163390000
Histone H1x	H1FX	1	9	9	9	7	9	7	37.1	22.487	213	0.66679	0.77016	0.71543	0.8266	15637000000	4569900000	3280000000	4385100000	3402200000
Heterogeneous nuclear ribonucleoprotein U	HNRNPU	4	26	26	24	23	24	23	36.2	90.583	825	0.5829	0.76983	1.3087	1.7375	15930000000	4707100000	2745900000	3870800000	4606200000
Transcription elongation factor B polypeptide 2	TCEB2	3	2	2	2	2	2	2	18.6	12.527	113	0.62	0.766	0.84897	1.0748	274800000	91385000	50359000	71425000	61628000
Suppressor of SWI4 1 homolog	PPAN	7	11	11	10	7	10	7	30.2	51.872	460	0.63436	0.76584	0.69762	0.9206	933210000	325420000	185290000	118330000	304180000
SAFB-like transcription modulator	SLTM	11	8	8	4	7	4	7	9.8	117.15	1034	0.56188	0.76234	1.6531	2.3714	336080000	96514000	51173000	80039000	108350000
Protein KRI1 homolog	KRI1	9	27	27	25	23	25	23	42.9	83.251	709	0.58294	0.76192	0.60954	0.81031	20659000000	5828300000	3351500000	7067200000	4412200000
Nucleolar and spindle-associated protein 1	NUSAP1	9	20	20	19	20	19	20	49.3	49.323	440	0.5885	0.76148	0.71849	0.90094	5754900000	1794300000	1099800000	1637000000	1223700000
Tropomyosin alpha-3 chain	TPM3	14	9	6	5	8	3	5	32.8	27.174	232	0.58626	0.75918	0.4621	0.55084	623210000	190820000	177370000	164020000	91009000
KRR1 small subunit processome component homolog	KRR1	2	19	19	18	17	18	17	44.4	43.664	381	0.59057	0.75733	0.61083	0.79742	18322000000	4943400000	3366600000	6115200000	3896300000
Putative ATP-dependent RNA helicase DHX33	DHX33	3	4	4	3	3	3	3	7.4	78.873	707	0.60914	0.7553	1.2236	1.5429	68404000	23767000	12175000	16274000	16188000
14-3-3 protein beta/alpha;14-3-3 protein beta/alpha, N-terminally processed	YWHAB	8	5	4	4	5	3	4	27	27.85	244	0.64022	0.75268	0.59692	0.71167	54767000	12423000	7279200	22547000	12517000
Non-POU domain-containing octamer-binding protein	NONO	5	3	3	3	2	3	2	12.1	23.673	207	0.59389	0.75243	1.0889	1.3767	211470000	77450000	53273000	32372000	48377000
Myc-associated zinc finger protein	MAZ	4	15	14	14	14	13	13	39.8	51.072	493	0.5895	0.75237	0.99941	1.295	3869800000	1501300000	884950000	729130000	754430000
Myosin phosphatase Rho-interacting protein	MPRIP	17	14	14	9	11	9	11	19.6	114.05	1000	0.61112	0.75236	0.377	0.49744	412850000	107140000	68931000	168020000	68759000
Splicing factor, proline- and glutamine-rich	SFPQ	2	7	7	7	4	7	4	14.3	76.149	707	0.56022	0.75165	0.85361	1.1925	789970000	293790000	167210000	165070000	163900000
BUD13 homolog	BUD13	2	13	13	9	13	9	13	22.9	70.52	619	0.55926	0.74196	0.67761	0.87139	2256500000	513100000	328310000	675450000	739610000
5-3 exoribonuclease 2	XRN2	3	4	4	4	2	4	2	5.6	102.42	896	0.58562	0.73774	1.0837	1.4378	53947000	18023000	11058000	12569000	12296000
MKI67 FHA domain-interacting nucleolar phosphoprotein	NIFK	4	17	17	17	15	17	15	61.8	34.222	293	0.58268	0.73735	0.55774	0.73528	7722600000	2196700000	1384800000	2572600000	1568500000
Transcription factor A, mitochondrial	TFAM	2	7	7	6	7	6	7	24.4	29.096	246	0.61123	0.73511	1.0512	1.2349	1407800000	371090000	246780000	384600000	405350000
Glioma tumor suppressor candidate region gene 2 protein	GLTSCR2	3	9	9	7	8	7	8	29.7	52.633	472	0.55888	0.73403	0.86887	1.0691	1176500000	313750000	190740000	365480000	306570000
Krueppel-like factor 16	KLF16	1	13	13	12	10	12	10	77.4	25.43	252	0.56949	0.7316	0.74042	0.96129	7332800000	1962700000	1113900000	2532400000	1723800000
Zinc finger and BTB domain-containing protein 7B	ZBTB7B	1	10	10	9	10	9	10	24.7	58.026	539	0.54875	0.72945	0.95122	1.2649	5446600000	1668400000	898080000	1488600000	1391500000
Ezrin;Radixin	EZR;RDX	8	5	1	4	3	1	0	7.2	69.412	586	0.5935	0.72766	0.69914	0.89913	331810000	100950000	66272000	90273000	74313000
Probable ATP-dependent RNA helicase DDX56	DDX56	5	8	8	6	5	6	5	19.9	57.274	507	0.6139	0.72643	0.54693	0.69983	321770000	126720000	80275000	74999000	39776000
40S ribosomal protein S14	RPS14	3	7	7	7	7	7	7	39.1	16.273	151	0.48768	0.72299	0.55014	0.70604	5502800000	1920700000	1128300000	1538400000	915320000
Cancer/testis antigen family 45 member A5;Cancer/testis antigen family 45 member A4/A6;Cancer/testis antigen family 45 member A2;Cancer/testis antigen family 45 member A3;Cancer/testis antigen family 45 member A1	CT45A5;CT45A4;CT45A2;CT45A3;CT45A1	5	9	9	6	8	6	8	58.7	21.145	189	0.59697	0.72083	0.59919	0.73534	3164300000	891670000	556880000	1057600000	658180000
Uncharacterized protein C9orf114	C9orf114	2	12	12	10	11	10	11	33.8	42.008	376	0.54524	0.72055	0.5628	0.72041	1753600000	442000000	248710000	659340000	403560000
DNA damage-binding protein 1	DDB1	18	9	9	4	8	4	8	10.9	126.97	1140	0.57192	0.7154	0.62289	0.86467	267440000	59198000	28329000	115790000	64128000
60S ribosomal protein L7-like 1	RPL7L1	2	8	8	2	8	2	8	31.3	28.661	246	0.5943	0.71415	0.49502	0.58273	499650000	98079000	48081000	241410000	112080000
NF-kappa-B-activating protein	NKAP	2	9	9	9	9	9	9	27.2	47.138	415	0.58277	0.70905	0.65044	0.80899	3485400000	994430000	557970000	1189900000	743080000
Zinc finger protein 668	ZNF668	2	4	4	4	4	4	4	7.1	67.889	619	0.53634	0.70415	1.0038	1.3186	311720000	80220000	57384000	86450000	87669000
Peroxiredoxin-1	PRDX1	1	5	4	3	4	2	3	23.1	22.11	199	0.62535	0.70383	0.70155	0.8372	294450000	65133000	44945000	107310000	77062000
DNA dC->dU-editing enzyme APOBEC-3C	APOBEC3C	4	9	9	8	9	8	9	65.3	22.826	190	0.59486	0.70095	1.2438	1.5464	9848200000	2714600000	1677200000	2459900000	2996500000
Rab11 family-interacting protein 5	RAB11FIP5	1	8	8	7	8	7	8	20.1	70.414	653	0.53644	0.69789	0.53247	0.67812	482720000	142970000	78444000	178010000	83295000
Serine/arginine-rich splicing factor 3	SRSF3	2	9	8	9	8	8	7	55.6	14.203	124	0.55199	0.69687	1.1687	1.489	34724000000	10467000000	5831500000	8971600000	9454200000
DNA-(apurinic or apyrimidinic site) lyase;DNA-(apurinic or apyrimidinic site) lyase, mitochondrial	APEX1	10	16	16	16	14	16	14	58.8	35.554	318	0.54309	0.69539	1.2653	1.6679	4908500000	1387300000	791120000	1221600000	1508500000
14-3-3 protein theta	YWHAQ	3	3	2	2	3	1	2	14.7	27.764	245	0.53913	0.69371	0.61913	0.81658	51067000	13418000	5997400	19793000	11859000
Ras-related protein Rab-1A;Ras-related protein Rab-1B;Putative Ras-related protein Rab-1C;Ras-related protein Rab-13;Ras-related protein Rab-8B;Ras-related protein Rab-8A;Ras-related protein Rab-15	RAB1B;RAB1A;RAB1C;RAB8B;RAB13;RAB8A;RAB15	20	2	1	1	2	0	1	16	18.483	169	0.56653	0.69098	0.61474	0.73687	211700000	63010000	33223000	74977000	40493000
BCL-6 corepressor-like protein 1	BCORL1	3	21	20	20	16	19	15	15.3	190.59	1785	0.50998	0.69074	0.46542	0.6496	2505900000	749140000	602280000	662940000	491500000
Ribosome biogenesis protein BOP1	BOP1	4	9	9	7	6	7	6	16.4	83.629	746	0.55332	0.69039	0.56302	0.7085	320490000	144860000	81265000	68558000	25807000
Protein SFI1 homolog	SFI1	10	9	9	7	6	7	6	10.8	136.66	1148	0.52441	0.68233	0.62136	0.88317	399200000	99936000	76067000	153600000	69599000
Runt-related transcription factor 1	RUNX1	17	4	4	3	2	3	2	11.3	50.173	468	0.52148	0.68161	0.4639	0.60617	75215000	20079000	11673000	25390000	18073000
Ribosome production factor 2 homolog	RPF2	3	9	9	8	9	8	9	29.7	35.582	306	0.51727	0.67928	0.56986	0.75663	1140600000	388520000	236550000	314960000	200580000
Transcription elongation factor B polypeptide 3	TCEB3	1	7	7	6	7	6	7	14	89.908	798	0.54579	0.67522	0.77966	1.0842	556100000	133080000	72429000	206560000	144040000
Ribosome biogenesis protein WDR12	WDR12	1	7	7	4	6	4	6	20.8	47.707	423	0.56618	0.67057	0.47167	0.58024	586570000	95060000	54421000	335400000	101690000
Thioredoxin	TXN	2	2	2	1	2	1	2	25.9	9.4519	85	0.56257	0.66822	0.46137	0.52969	135920000	50747000	24979000	36906000	23292000
Microtubule-associated protein;Microtubule-associated protein 4	MAP4	12	3	3	2	3	2	3	4	88.276	828	0.5352	0.66695	0.37741	0.48721	95888000	18311000	11406000	50346000	15826000
Coiled-coil domain-containing protein 137	CCDC137	1	12	12	8	10	8	10	41.9	33.231	289	0.54671	0.66136	0.72643	0.92861	1774300000	365230000	276840000	657510000	474710000
L-lactate dehydrogenase B chain;L-lactate dehydrogenase	LDHB	4	8	7	8	7	7	6	28.1	36.638	334	0.52739	0.65506	0.51255	0.65124	540620000	161880000	86929000	185520000	106290000
RNA-binding protein 39	RBM39;RNPC2	25	26	26	25	24	25	24	54	58.656	524	0.5063	0.6537	1.0099	1.2943	77280000000	24219000000	14309000000	17744000000	21009000000
ATP-dependent RNA helicase DDX54	DDX54	4	50	2	44	48	1	2	57.3	98.665	882	0.49226	0.64866	0.63936	0.87028	40517000000	12124000000	6366400000	13094000000	8932600000
Kinesin-like protein KIF23	KIF23	11	6	6	4	5	4	5	9.1	98.104	856	0.51915	0.64699	0.65983	0.81297	274790000	67805000	19748000	113070000	74165000
Histone H1.4	HIST1H1E	1	19	2	18	18	2	2	42.5	21.865	219	0.53322	0.64153	0.63538	0.71957	825560000	341680000	216280000	148320000	119280000
Probable ATP-dependent RNA helicase DDX5	DDX5	2	15	11	12	11	10	7	28.2	69.147	614	0.48016	0.63404	0.90668	1.1754	949680000	324130000	161990000	228010000	235550000
Hepatocyte growth factor;Hepatocyte growth factor alpha chain;Hepatocyte growth factor beta chain	HGF	10	6	6	5	5	5	5	7.1	82.601	723	0.47552	0.62875	0.68003	0.83004	193470000	63642000	40165000	48973000	40692000
Protein disulfide-isomerase A6	PDIA6	5	2	2	2	2	2	2	7.1	47.837	437	0.48492	0.62469	0.58446	0.76559	156660000	52110000	21701000	61653000	21192000
Cold-inducible RNA-binding protein	CIRBP	3	3	3	3	2	3	2	25	18.648	172	0.52528	0.62324	1.1283	1.3555	306750000	59697000	37049000	91006000	119000000
ATP-dependent RNA helicase DDX3X;ATP-dependent RNA helicase DDX3Y	DDX3X;DDX3Y	6	7	6	6	4	5	3	13.5	71.354	646	0.49402	0.59971	1.0857	1.3425	155320000	62852000	41522000	26641000	24307000
Glyceraldehyde-3-phosphate dehydrogenase	GAPDH	6	11	11	11	9	11	9	49.8	31.548	293	0.48569	0.5971	0.49237	0.60903	2366800000	801960000	565550000	673500000	325740000
Probable RNA-binding protein 19	RBM19	2	5	5	5	4	5	4	6.1	107.33	960	0.45639	0.59169	0.68814	0.98279	224590000	107590000	53136000	36601000	27260000
Ribonuclease P protein subunit p29	POP4	2	3	3	2	3	2	3	14.1	25.424	220	0.48601	0.5916	0.6363	0.79016	83132000	26356000	14236000	27711000	14829000
Heterogeneous nuclear ribonucleoprotein R	HNRNPR	1	23	1	18	22	1	1	38.1	71.214	636	0.43975	0.58025	1.6433	1.9976	3997100000	1180300000	589300000	792060000	1435500000
POTE ankyrin domain family member E;POTE ankyrin domain family member I;Putative beta-actin-like protein 3;POTE ankyrin domain family member J	POTEE;POTEI;POTEKP;POTEJ	4	8	1	8	8	1	1	9.5	121.36	1075	0.46742	0.56604	0.46046	0.54607	59471000	17845000	8253300	20549000	12824000
Triosephosphate isomerase	TPI1	3	6	6	5	6	5	6	35.3	26.669	249	0.47894	0.56381	0.38743	0.45683	232550000	66578000	28696000	95346000	41928000
High mobility group protein B2	HMGB2	2	5	4	4	4	3	3	41	15.404	134	0.49791	0.56138	1.0919	1.4627	360340000	112300000	58460000	81324000	108260000
Poly(rC)-binding protein 1	PCBP1	1	23	16	22	22	15	15	92.4	37.497	356	0.43109	0.54582	1.3618	1.7144	209660000000	67539000000	30047000000	45249000000	66827000000
Ribosome biogenesis protein BMS1 homolog	BMS1	1	15	15	14	11	14	11	15.5	145.81	1282	0.41119	0.5438	0.92745	1.2695	931820000	403400000	191560000	169140000	167720000
RNA 3-terminal phosphate cyclase-like protein	RCL1	5	15	15	13	15	13	15	45.8	40.842	373	0.42699	0.53703	0.95628	1.2501	1852600000	426330000	236730000	572770000	616810000
Ribonuclease H1	RNASEH1	1	4	4	2	3	2	3	17.1	32.064	286	0.4006	0.52965	1.4026	1.7297	124100000	21100000	9426400	37060000	56513000
Ribosome biogenesis regulatory protein homolog	RRS1	1	7	7	6	5	6	5	21.6	41.193	365	0.39228	0.5144	0.54818	0.69328	307460000	127230000	119200000	38603000	22422000
Rac GTPase-activating protein 1	RACGAP1	15	7	7	5	4	5	4	12.8	71.026	632	0.39428	0.5143	0.72687	0.91896	193570000	75125000	20727000	53726000	43992000
Antigen KI-67	MKI67	2	185	2	171	179	2	2	68.2	319.44	2896	0.43744	0.50467	0.36216	0.487	673660000	203640000	85320000	282630000	102080000
Cofilin-1	CFL1	9	8	8	5	7	5	7	54.2	18.502	166	0.44397	0.50016	0.45847	0.5292	599980000	172270000	80363000	221160000	126180000
THO complex subunit 4	ALYREF	2	9	9	8	7	8	7	39.3	26.888	257	0.40253	0.49827	1.0696	1.3311	3542600000	1323100000	582080000	849690000	787720000
RNA-binding protein 42	RBM42	4	8	8	5	7	5	7	24	47.025	446	0.40298	0.49247	2.4377	3.0989	954190000	162900000	130120000	203810000	457360000
Probable 28S rRNA (cytosine(4447)-C(5))-methyltransferase	NOP2	10	31	31	30	24	30	24	40.6	89.301	812	0.39555	0.48595	0.42305	0.56808	23113000000	8065900000	3410000000	8185800000	3451100000
ATP-dependent RNA helicase DDX54	DDX54	1	49	1	44	47	1	1	57	98.594	881	0.35539	0.48555	0.43009	0.68803	111820000	50962000	18382000	29835000	12640000
Serpin H1	SERPINH1	14	11	11	11	10	11	10	30.4	46.44	418	0.35275	0.47265	0.3264	0.4189	4240100000	667630000	1472500000	589660000	1510300000
Heterogeneous nuclear ribonucleoprotein K	HNRNPK	2	39	0	37	36	0	0	71.8	48.562	440	0.38527	0.46574	1.6856	2.0831	8199200000	3002500000	1121100000	1496500000	2579100000
Transcription factor COE2;Transcription factor COE1;Transcription factor COE3	EBF2;EBF1;EBF3	11	6	6	6	6	6	6	14.1	62.649	575	0.33425	0.44237	1.1626	1.53	730090000	184890000	69198000	165430000	310570000
60S ribosome subunit biogenesis protein NIP7 homolog	NIP7	2	11	11	9	11	9	11	76.1	20.462	180	0.34371	0.43617	0.37	0.46276	9774600000	2827200000	963380000	4549200000	1434800000
Probable ATP-dependent RNA helicase DDX17	DDX17	8	10	6	8	8	6	4	17	81.067	737	0.35599	0.43578	1.089	1.3348	292210000	158630000	42712000	41088000	49774000
Heterogeneous nuclear ribonucleoprotein K	HNRNPK	2	39	0	38	36	0	0	72.8	50.976	463	0.33217	0.43275	1.7106	2.189	498980000000	180790000000	62765000000	92431000000	163000000000
Insulin-like growth factor 2 mRNA-binding protein 3	IGF2BP3	5	18	18	15	15	15	15	40.1	63.704	579	0.34749	0.42356	1.9059	2.5228	1864000000	700990000	245020000	337100000	580890000
RNA-binding motif protein, X chromosome;RNA-binding motif protein, X chromosome, N-terminally processed;RNA binding motif protein, X-linked-like-1	RBMX;RBMXL1	7	10	10	8	7	8	7	25.6	42.331	391	0.29333	0.35977	2.2007	2.7399	2334600000	938580000	297730000	341580000	756700000
Polypyrimidine tract-binding protein 1	PTBP1	4	20	17	19	19	16	16	61	57.221	531	0.27109	0.35826	2.4109	3.1582	32664000000	10656000000	3026100000	5378500000	13604000000
	PCBP2	1	23	0	22	23	0	0	84.7	33.8	321	0.28584	0.33739	1.8465	2.2937	2746900000	992730000	303610000	517280000	933290000
Poly(rC)-binding protein 2	PCBP2	8	23	0	22	22	0	0	85.4	35.346	335	0.26052	0.32418	2.1705	2.6489	145050000000	55562000000	15883000000	21677000000	51927000000
Poly(rC)-binding protein 2	PCBP2	3	23	0	22	22	0	0	85.2	34.917	331	0.26189	0.32256	2.2646	2.8036	3401000000	1291300000	349220000	521870000	1238600000
Poly(rC)-binding protein 4	PCBP4	12	7	5	6	7	4	5	23.8	33.406	323	0.26299	0.3173	2.2047	2.9095	216560000	65251000	52496000	31602000	67208000
Transcription factor AP-2-alpha	TFAP2A	12	4	4	4	2	4	2	12.3	47.183	431	0.23736	0.29622	2.3477	3.0882	263080000	129730000	32030000	25614000	75697000
RNA-binding protein FUS	FUS	5	4	2	3	3	1	1	24.5	15.24	151	0.21651	0.25606	0.60964	0.81567	332450000	104590000	36154000	121760000	69941000
Annexin A1;Annexin	ANXA1	3	8	8	7	8	7	8	34.1	38.714	346	0.1918	0.23784	0.16267	0.20276	215140000	85888000	16997000	98824000	13432000
Zinc finger protein 281	ZNF281	3	13	13	12	8	12	8	21.2	96.914	895	0.1895	0.22823	3.6196	4.4286	771720000	389530000	49394000	112450000	220350000
Annexin A5;Annexin	ANXA5	5	8	8	8	7	8	7	33.1	35.936	320	0.15813	0.19893	0.17256	0.22613	621800000	262890000	30140000	282890000	45879000
Poly(rC)-binding protein 2	PCBP2	1	23	0	22	23	0	0	74	38.58	365	0.14828	0.19392	2.7794	3.7243	4728300000	1858100000	368110000	630580000	1871500000
Zinc finger protein 148	ZNF148	7	39	39	38	34	38	34	62.3	88.975	794	0.052465	0.069885	11.461	15.526	24878000000	12071000000	246650000	1014200000	11547000000
