# Supplementary material for: E4F1 and ZNF148 are transcriptional activators of the −57A > C and wild-type TERT promoter
Source: Genome Res. 2023 Nov;33(11):1893–905. doi: 10.1101/gr.277724.123 (PMC10760450; doi:10.1101/gr.277724.123)
Supplement: Supplement 4 [file Supplemental_Table_S4.xlsx]

## Sheet: Table S4 (-146C>T)
Table S4. MS data for SILAC-based in-vitro DNA reconstitution pull-downs using U87MG nuclear extract with -146C>T vs. WT TERT promoter probes
Protein names	Gene names	Number of proteins	Peptides	Unique peptides	Peptides for	Peptides rev	Unique peptides for	Unique peptides rev	Sequence coverage [%]	Mol. weight [kDa]	Sequence length	Ratio H/L for	Ratio H/L normalized for	Ratio H/L rev	Ratio H/L normalized rev	Intensity	Intensity L for	Intensity H for	Intensity L rev	Intensity H rev
Transcription factor ETV6	ETV6	2	14	14	9	11	9	11	38.3	52.999	452	12.111	15.971	0.032847	0.042703	2295400000	62079000	744860000	1429900000	58542000
ETS-related transcription factor Elf-1	ELF1	3	16	15	13	15	12	15	45.6	67.497	619	9.2289	12.134	0.019074	0.02232	7547400000	315010000	3021800000	4150600000	59956000
ETS-related transcription factor Elf-2	ELF2	6	17	2	16	13	2	2	53.4	56.133	521	8.7794	11.692	0.13749	0.17892	3081800000	119190000	1414800000	1483500000	64307000
ETS-related transcription factor Elf-4	ELF4	1	8	7	7	7	6	7	25.3	70.729	663	8.6965	11.459	0.12294	0.15985	1169000000	51778000	449500000	649340000	18344000
Splicing factor, proline- and glutamine-rich	SFPQ	2	3	3	3	2	3	2	7.6	72.262	669	7.6116	10.445	0.83369	1.0826	145010000	7704400	101680000	21533000	14089000
Cellular nucleic acid-binding protein	CNBP	8	7	7	4	6	4	6	47.1	18.742	170	6.8189	8.6835	0.059333	0.068066	452510000	13269000	119520000	312230000	7491900
Transcriptional activator protein Pur-alpha	PURA	1	14	13	11	13	10	12	56.5	34.91	322	4.5726	5.2632	0.14055	0.17424	16496000000	1126500000	5154400000	8931300000	1284000000
60 kDa heat shock protein, mitochondrial	HSPD1	9	6	6	6	2	6	2	19	61.054	573	3.789	4.9257	1.5522	1.9172	249170000	18876000	208730000	10396000	11171000
Transcriptional activator protein Pur-beta	PURB	1	14	13	13	13	12	12	68.6	33.24	312	3.8665	4.8157	0.1678	0.18667	20458000000	2906600000	7869100000	8502900000	1179000000
Matrin-3	MATR3	11	3	3	3	2	3	2	6.8	88.358	794	3.4569	4.2902	0.32205	0.4126	49218000	7266800	23686000	12480000	5785100
RNA-binding protein FUS	FUS	5	5	3	4	4	2	3	14.2	44.812	429	3.309	4.2012	0.11348	0.14662	775830000	96602000	273140000	374970000	31117000
ATP-dependent RNA helicase DDX3X;ATP-dependent RNA helicase DDX3Y	DDX3X;DDX3Y	9	14	13	9	13	8	12	26.9	71.354	646	2.987	3.8449	0.15833	0.20237	984790000	102750000	308820000	508540000	64692000
Heterogeneous nuclear ribonucleoproteins C1/C2	HNRNPC	20	3	3	2	3	2	3	33.3	12.78	117	3.2095	3.7142	1.0446	1.3076	207350000	30552000	88526000	46791000	41483000
Vimentin	VIM	17	30	27	30	14	27	12	67.8	53.651	466	2.7726	3.6107	1.5751	1.9858	5171900000	1256500000	3059200000	402620000	453600000
Probable ATP-dependent RNA helicase DDX17	DDX17	6	11	6	8	9	5	4	20.4	72.575	652	2.985	3.5571	0.23728	0.27776	518270000	103550000	172150000	188810000	53757000
RNA-binding motif protein, X chromosome;RNA-binding motif protein, X chromosome, N-terminally processed;RNA binding motif protein, X-linked-like-1	RBMX;RBMXL1	6	4	4	4	3	4	3	12.3	42.331	391	2.157	2.5994	0.26133	0.26245	324750000	45436000	91397000	150660000	37251000
Gamma-interferon-inducible protein 16;Pyrin and HIN domain-containing protein 1	IFI16;PYHIN1	10	2	2	1	2	1	2	3.7	83.033	733	1.6961	2.2329	0.8233	1.0258	57513000	9717300	17859000	17180000	12757000
Transcription initiation factor TFIID subunit 7	TAF7	1	2	2	2	2	2	2	6.3	40.259	349	1.6555	2.1624	0.90041	1.1665	72783000	14463000	20712000	17842000	19765000
Serine/arginine-rich splicing factor 10;Serine/arginine-rich splicing factor 12	SRSF10;SRSF12	8	4	4	2	2	2	2	29.1	20.913	172	1.5914	2.0915	0.41662	0.55204	58223000	14953000	23315000	13698000	6256600
Bcl-2-associated transcription factor 1	BCLAF1	10	7	7	6	5	6	5	11	83.231	726	1.5623	2.0674	0.42099	0.5451	353830000	55567000	90642000	141160000	66463000
Apoptotic chromatin condensation inducer in the nucleus	ACIN1	6	5	5	3	4	3	4	11	67.494	582	1.5057	2.0635	0.46148	0.61395	108230000	25076000	33362000	31899000	17888000
Probable ATP-dependent RNA helicase DDX5	DDX5	2	12	7	8	11	5	6	24.1	61.635	544	1.5715	2.0463	0.22874	0.29672	900360000	146240000	254270000	414420000	85433000
Enhancer of rudimentary homolog	ERH	2	4	4	4	4	4	4	28.8	12.259	104	1.6231	1.9149	0.45404	0.5142	1662100000	305700000	460510000	623570000	272280000
Transformer-2 protein homolog beta	TRA2B	3	4	4	2	3	2	3	19.8	29.186	252	1.5281	1.9089	0.61858	0.8244	170420000	26425000	44334000	56364000	43297000
Heterogeneous nuclear ribonucleoprotein M	HNRNPM	4	21	21	17	18	17	18	39.4	73.62	691	1.4478	1.8999	0.34475	0.40748	1985800000	363980000	556680000	760220000	304880000
U4/U6.U5 tri-snRNP-associated protein 2	USP39	5	4	4	4	2	4	2	8.8	58.028	502	1.5919	1.8789	0.88955	1.0641	190820000	76211000	77459000	19145000	18001000
Nuclear cap-binding protein subunit 1	NCBP1	1	4	4	4	3	4	3	5.7	91.838	790	1.5698	1.8672	0.60172	0.74138	83096000	21362000	31106000	18923000	11706000
Thyroid hormone receptor-associated protein 3	THRAP3	1	17	17	11	14	11	14	16.5	108.66	955	1.4371	1.8551	0.40971	0.53796	1293000000	228210000	297040000	518370000	249390000
Chromatin assembly factor 1 subunit B	CHAF1B	1	4	4	4	4	4	4	10.6	61.492	559	1.4086	1.8464	0.82622	1.0699	374900000	63444000	106400000	88858000	116200000
Pleckstrin homology domain-containing family O member 1	PLEKHO1	4	3	3	2	3	2	3	10.9	42.329	375	1.5545	1.8329	0.87316	1.0333	126490000	23114000	27004000	40134000	36241000
Transcription initiation factor TFIID subunit 4	TAF4	4	11	11	6	9	6	9	13.4	110.11	1085	1.3229	1.8111	0.7118	0.99712	336090000	52592000	81278000	119670000	82549000
Heterogeneous nuclear ribonucleoprotein D0;Heterogeneous nuclear ribonucleoprotein D-like	HNRNPD;HNRNPDL	14	2	2	1	2	1	2	19.6	12.64	112	1.5166	1.7869	0.56139	0.66735	131130000	21615000	26465000	52185000	30869000
U1 small nuclear ribonucleoprotein A	SNRPA	2	3	3	2	3	2	3	16.7	31.279	282	1.3416	1.7603	0.67729	0.84847	120000000	20893000	30588000	37300000	31216000
Krueppel-like factor 10	KLF10	2	6	6	5	6	5	6	14.1	51.423	469	1.3109	1.7426	0.79284	0.98385	567160000	126740000	117580000	180740000	142100000
Transcription initiation factor TFIID subunit 5	TAF5	2	5	5	5	4	5	4	7.5	86.829	800	1.2969	1.7118	0.83621	1.0239	300250000	57038000	83295000	88708000	71206000
Transcription initiation factor TFIID subunit 1-like;Transcription initiation factor TFIID subunit 1	TAF1L;TAF1	9	6	6	3	4	3	4	3.5	207.3	1826	1.3033	1.6995	0.70015	0.95863	116990000	19228000	21212000	39382000	37167000
Heterogeneous nuclear ribonucleoprotein U-like protein 1	HNRNPUL1	5	2	2	2	2	2	2	3.7	86.121	767	1.2974	1.681	0.57347	0.76408	175500000	30624000	44495000	67841000	32537000
Thymocyte nuclear protein 1	THYN1	3	6	6	4	5	4	5	33.3	25.697	225	1.4459	1.675	0.49854	0.55607	371150000	80630000	123620000	107980000	58914000
Heterogeneous nuclear ribonucleoprotein H;Heterogeneous nuclear ribonucleoprotein H, N-terminally processed	HNRNPH1	24	7	5	6	4	4	2	25.4	51.229	472	1.2869	1.6743	0.36913	0.47881	361130000	78546000	116990000	122570000	43027000
Splicing factor 3B subunit 1	SF3B1	4	10	10	8	4	8	4	9.7	145.83	1304	1.3226	1.663	0.70979	0.90471	168030000	47258000	61206000	39409000	20156000
PC4 and SFRS1-interacting protein	PSIP1	2	3	3	2	2	2	2	6.8	60.103	530	1.2825	1.6258	0.75044	0.9012	47086000	15368000	15746000	8498700	7472900
Serine/arginine repetitive matrix protein 2	SRRM2	4	16	16	10	13	10	13	8.5	299.61	2752	1.2003	1.6112	0.4201	0.53861	729060000	125630000	148390000	306320000	148720000
Serine/arginine-rich splicing factor 1	SRSF1	4	12	12	11	12	11	12	40.7	27.744	248	1.2281	1.598	0.55141	0.67373	2596100000	537070000	641280000	892810000	524950000
Transcription initiation factor TFIID subunit 9	TAF9	1	4	2	3	2	1	1	20.8	28.974	264	1.2156	1.5905	0.7114	0.8547	65561000	16687000	19436000	15860000	13578000
Peptidyl-prolyl cis-trans isomerase;Peptidyl-prolyl cis-trans isomerase H	PPIH	4	3	3	2	2	2	2	33.3	10.281	96	1.3129	1.5882	0.70424	0.84091	476610000	101300000	245470000	73947000	55897000
Intron-binding protein aquarius	AQR	2	4	3	2	4	2	3	3.4	171.29	1485	1.2143	1.5867	0.57608	0.75908	56870000	4983800	10102000	27247000	14537000
NK-tumor recognition protein;Putative peptidyl-prolyl cis-trans isomerase	NKTR	1	3	3	2	2	2	2	2.5	165.67	1462	1.1895	1.5622	0.6784	0.88241	56504000	11077000	14917000	17640000	12869000
Transcription initiation factor TFIID subunit 6	TAF6	12	11	11	8	11	8	11	25.1	64.231	601	1.326	1.5565	0.78204	0.92972	1231700000	351360000	119190000	614160000	147010000
Pre-mRNA-processing-splicing factor 8	PRPF8	2	36	36	27	33	27	33	20.4	273.6	2335	1.1406	1.5287	0.62684	0.83786	2717700000	498780000	553960000	1039700000	625290000
Serine/threonine-protein phosphatase PGAM5, mitochondrial	PGAM5	3	7	7	7	6	7	6	24.9	32.004	289	1.2728	1.5014	0.50666	0.59905	542360000	114420000	154360000	180870000	92715000
Chromatin assembly factor 1 subunit A	CHAF1A	4	2	2	2	2	2	2	2.5	84.714	749	1.1855	1.4924	1.0109	1.3032	70938000	12225000	13808000	20120000	24786000
U5 small nuclear ribonucleoprotein 200 kDa helicase	SNRNP200	7	61	61	47	54	47	54	36.7	244.5	2136	1.1113	1.4887	0.62627	0.82533	4668100000	876380000	994900000	1688600000	1108200000
Cleavage and polyadenylation specificity factor subunit 5	NUDT21	2	5	5	3	4	3	4	27.3	26.227	227	1.2721	1.4753	0.59416	0.71378	94945000	18585000	25456000	30185000	20720000
Chromodomain-helicase-DNA-binding protein 2	CHD2	15	25	25	20	21	20	21	15.1	200.56	1739	1.1251	1.4654	1.1869	1.6043	2105100000	413440000	456220000	542370000	693040000
DNA-dependent protein kinase catalytic subunit	PRKDC	5	151	151	126	137	126	137	41.8	469.08	4128	1.1235	1.4583	0.40031	0.52727	49697000000	8283800000	10236000000	20122000000	11055000000
Transcription elongation factor, mitochondrial	TEFM	3	6	6	5	5	5	5	21.7	41.676	360	1.1011	1.4477	1.0614	1.3404	158800000	27960000	31203000	47837000	51795000
Histone-binding protein RBBP4	RBBP4	18	6	6	6	6	6	6	19	46.158	410	1.0915	1.4328	1.1292	1.4516	477830000	99619000	121150000	118280000	138770000
Endonuclease III-like protein 1	NTHL1	1	5	5	4	4	4	4	26.9	34.389	312	1.214	1.4315	0.48192	0.57101	710430000	132870000	127550000	323640000	126370000
Serine/arginine-rich splicing factor 6	SRSF6	3	9	5	8	7	5	3	25.1	38.418	335	1.1192	1.421	0.58646	0.71982	4823400000	1308200000	1259900000	1410600000	844700000
Pre-mRNA-processing factor 6	PRPF6	2	15	15	12	14	12	14	17.1	106.92	941	1.0548	1.421	0.65408	0.86749	1381700000	282780000	300430000	488770000	309760000
Probable ATP-dependent RNA helicase DDX23	DDX23	3	11	11	9	9	9	9	15.1	95.581	820	1.0959	1.3856	0.70718	0.89375	698050000	151130000	171690000	218080000	157150000
RNA-binding protein 25	RBM25	5	7	7	5	5	5	5	10.3	100.18	843	1.1026	1.3741	0.74753	1.0283	222010000	46103000	56819000	76870000	42216000
E3 ubiquitin-protein ligase RBBP6	RBBP6	4	57	57	40	55	40	55	31.9	201.56	1792	1.0287	1.3635	0.96269	1.3231	19712000000	3874400000	2754000000	8177300000	4906000000
Actin, cytoplasmic 2;Actin, cytoplasmic 2, N-terminally processed;Actin, alpha skeletal muscle;Actin, alpha cardiac muscle 1;Actin, gamma-enteric smooth muscle;Actin, aortic smooth muscle	ACTG1;ACTA1;ACTC1;ACTG2;ACTA2	25	16	1	12	15	0	1	53.1	41.792	375	1.0685	1.3567	0.32914	0.43125	6051200000	1299400000	1664100000	2275600000	812140000
Small nuclear ribonucleoprotein Sm D1	SNRPD1	1	2	2	2	2	2	2	20.2	13.281	119	1.141	1.3526	0.61978	0.75803	251950000	62872000	74232000	74271000	40577000
Cyclic AMP-responsive element-binding protein 1;cAMP-responsive element modulator;Cyclic AMP-dependent transcription factor ATF-1	CREB1;CREM;ATF1	25	2	2	2	2	2	2	10	25.444	230	1.0886	1.3506	0.62921	0.73189	550760000	105920000	116400000	205810000	122630000
Myosin-9	MYH9	13	59	50	45	55	40	46	36.7	226.53	1960	1.0359	1.3375	0.2701	0.36065	4525400000	856150000	892400000	2149800000	627120000
Small nuclear ribonucleoprotein-associated proteins B and B;Small nuclear ribonucleoprotein-associated protein N	SNRPB;SNRPN	8	3	3	2	3	2	3	12.8	29.975	288	1.0135	1.3315	0.50598	0.63429	237320000	47263000	51861000	84364000	53835000
Transcription factor Sp4	SP4	3	8	8	6	6	6	6	15.9	81.984	784	1.0009	1.3188	0.6496	0.82415	730590000	240540000	182970000	188850000	118230000
Poly [ADP-ribose] polymerase 1	PARP1	4	64	64	61	61	61	61	61.2	113.08	1014	1.0389	1.3077	0.6555	0.85031	165640000000	33378000000	34852000000	58306000000	39102000000
Fibroblast growth factor 2	FGF2	4	3	3	2	3	2	3	18.1	17.254	155	1.0486	1.3068	1.6071	1.9899	181820000	19105000	19365000	56949000	86400000
116 kDa U5 small nuclear ribonucleoprotein component	EFTUD2	4	27	27	23	27	23	27	41.9	105.38	937	1.0408	1.2926	0.64482	0.83217	3307000000	639340000	756960000	1182000000	728700000
Charged multivesicular body protein 4b	CHMP4B	1	6	6	3	6	3	6	37.9	24.95	224	1.0314	1.2911	0.55789	0.62817	171680000	32416000	32604000	72336000	34322000
40S ribosomal protein S25	RPS25	1	4	4	4	4	4	4	24	13.742	125	1.0911	1.2899	1.2749	1.4461	1512800000	282480000	304290000	427740000	498290000
Transcription factor Sp1	SP1	2	5	5	4	4	4	4	9	80.692	785	1.0952	1.2871	0.6953	0.83316	1297700000	300010000	337210000	381740000	278730000
DNA-directed RNA polymerase I subunit RPA1;DNA-directed RNA polymerase	POLR1A	4	48	48	39	42	39	42	38.1	194.81	1720	0.97125	1.2853	0.67398	0.90937	5236300000	1105100000	1044300000	1809400000	1277500000
Transcription factor Sp3	SP3	7	10	2	9	10	2	2	13.1	81.924	781	1.0379	1.2817	0.78347	0.9667	6347600000	1412700000	1508500000	1921200000	1505300000
Poly(U)-binding-splicing factor PUF60	PUF60	12	17	17	10	14	10	14	40.5	55.399	513	1.0301	1.2739	0.70632	0.90624	2067000000	468820000	456350000	656980000	484830000
Dual specificity protein kinase CLK3	CLK3	5	6	6	3	5	3	5	20.1	56.228	467	0.97523	1.2709	0.47656	0.61832	200960000	50791000	32929000	84284000	32951000
Transcription initiation factor TFIID subunit 3	TAF3	2	12	12	10	11	10	11	15	103.58	929	0.94639	1.2706	0.75165	0.99823	1502600000	306720000	291430000	445480000	458920000
Phosphatidylinositol 5-phosphate 4-kinase type-2 beta	PIP4K2B	3	10	7	10	6	7	5	28.1	47.377	416	1.0135	1.2667	0.93752	1.2026	556260000	156600000	139250000	131080000	129330000
DNA-directed RNA polymerase I subunit RPA2;DNA-directed RNA polymerase	POLR1B	12	21	21	13	21	13	21	23.1	128.23	1135	0.91861	1.2615	0.7038	0.96021	1500600000	205330000	201740000	645700000	447840000
A-kinase anchor protein 17A	AKAP17A	3	3	3	2	2	2	2	3.5	80.735	695	0.9828	1.261	0.8696	1.078	45527000	10011000	10877000	12917000	11722000
60S ribosomal protein L22	RPL22	1	5	5	3	5	3	5	51.6	14.787	128	0.94682	1.24	0.9333	1.079	4025100000	898750000	826020000	1199800000	1100500000
Protein CMSS1	CMSS1	3	5	5	2	4	2	4	24.4	26.228	225	0.97361	1.2299	1.155	1.5055	184720000	47486000	53074000	34235000	49922000
Zinc finger and BTB domain-containing protein 48	ZBTB48	3	5	5	4	4	4	4	9.7	77.053	688	0.97012	1.2269	1.6628	1.9816	327320000	67227000	41782000	165020000	53293000
X-ray repair cross-complementing protein 5	XRCC5	2	43	43	38	40	38	40	70.8	82.704	732	1.0023	1.2267	0.55718	0.69996	71859000000	17324000000	17681000000	23349000000	13504000000
CDKN2A-interacting protein	CDKN2AIP	2	9	9	5	7	5	7	25	61.124	580	1.0195	1.2211	0.57475	0.6915	221080000	48227000	65167000	75592000	32092000
Putative pre-mRNA-splicing factor ATP-dependent RNA helicase DHX15	DHX15	2	6	6	4	6	4	6	8.2	89.502	784	1.0298	1.2203	0.78726	0.94031	349390000	70569000	87163000	106920000	84739000
Ubiquitin carboxyl-terminal hydrolase 7;Ubiquitin carboxyl-terminal hydrolase	USP7	5	14	14	8	12	8	12	16	128.3	1102	0.96854	1.2105	0.70396	0.92906	438300000	73669000	74855000	174980000	114800000
60S ribosomal protein L35	RPL35	3	6	6	4	5	4	5	39	14.551	123	1.031	1.2094	0.98788	1.1278	7882700000	1709500000	1851300000	2049800000	2272100000
Transcription factor AP-4	TFAP4	1	4	4	4	4	4	4	18.3	38.725	338	1.0248	1.2093	0.755	0.90369	477110000	117360000	120410000	129080000	110260000
Transcriptional repressor CTCF	CTCF	11	8	8	6	7	6	7	14.3	82.785	727	0.92513	1.2084	0.88651	1.1619	395290000	67031000	66130000	143310000	118830000
DNA-directed RNA polymerases I and III subunit RPAC1	POLR1C	8	12	12	10	10	10	10	54.3	39.249	346	0.92793	1.208	0.71089	0.86026	1416900000	399540000	377590000	365840000	273920000
X-ray repair cross-complementing protein 6	XRCC6	5	43	43	41	42	41	42	65	69.842	609	0.99562	1.204	0.55705	0.67775	107530000000	27478000000	27685000000	33285000000	19078000000
DNA-directed RNA polymerases I, II, and III subunit RPABC3	POLR2H	6	5	5	5	3	5	3	40.9	16.996	149	0.98391	1.2025	0.71966	0.87523	1343600000	384780000	354770000	351430000	252600000
Pre-mRNA-processing factor 40 homolog A	PRPF40A	5	3	3	2	2	2	2	4.1	95.096	826	0.91849	1.2005	0.93609	1.2714	115270000	20167000	17133000	40157000	37808000
DNA-directed RNA polymerase I subunit RPA43	TWISTNB	1	4	4	3	3	3	3	13	37.432	338	1.021	1.1988	0.71797	0.86206	119660000	36729000	32428000	29917000	20583000
Dehydrogenase/reductase SDR family member 2, mitochondrial	DHRS2	5	6	6	6	3	6	3	30.7	23.818	225	0.95803	1.1953	1.037	1.2924	320600000	104670000	115890000	49561000	50474000
DNA-directed RNA polymerases I, II, and III subunit RPABC1	POLR2E	1	9	9	7	8	7	8	53.3	24.551	210	0.98306	1.1944	0.70228	0.89458	787980000	184710000	166490000	260350000	176430000
60S ribosomal protein L10a	RPL10A	1	8	8	6	7	6	7	38.7	24.831	217	0.971	1.1936	0.86795	0.99826	1074400000	418250000	395160000	139930000	121100000
Band 4.1-like protein 5	EPB41L5	5	5	4	4	5	3	4	13.1	57.885	505	1.0165	1.1923	0.82043	0.98507	202500000	55333000	50109000	52377000	44676000
Interferon-inducible protein AIM2	AIM2	3	14	14	7	13	7	13	46.1	38.953	343	1.021	1.183	0.90132	1.0763	906700000	189350000	170050000	277180000	270120000
Nucleophosmin	NPM1	5	8	8	7	5	7	5	37.4	29.464	265	1.0171	1.1812	0.88934	0.99986	665100000	165040000	188730000	136690000	174630000
Nuclear apoptosis-inducing factor 1	NAIF1	2	10	10	9	8	9	8	32.1	35.164	327	0.894	1.1782	0.66267	0.86202	3657400000	871230000	800760000	1156600000	828800000
Cytosolic carboxypeptidase 1	AGTPBP1	9	43	43	39	40	39	40	41.8	138.45	1226	0.92252	1.176	0.77551	1.0096	12538000000	2604000000	2897600000	4016200000	3020000000
Chromatin target of PRMT1 protein	CHTOP	3	2	2	2	2	2	2	12.9	21.918	202	0.95	1.1753	0.62508	0.75097	58758000	14457000	15641000	17798000	10862000
Uncharacterized protein C11orf95	C11orf95	1	3	3	3	2	3	2	5.2	73.197	678	0.89566	1.1752	0.70909	0.92038	144170000	50449000	34303000	31542000	27874000
RNA-binding protein 14	RBM14	8	16	16	12	15	12	15	26.5	69.491	669	0.88105	1.1743	0.45647	0.59349	1279300000	245650000	213020000	530250000	290400000
Small nuclear ribonucleoprotein Sm D3	SNRPD3	2	3	3	3	2	3	2	21.7	13.291	120	1.0115	1.1743	0.63795	0.74913	511530000	129880000	128770000	153290000	99581000
Serine/arginine-rich splicing factor 4	SRSF4	3	9	5	7	8	4	4	23.4	46.737	406	0.89359	1.1728	0.60825	0.82081	218920000	55368000	49182000	69612000	44758000
Tissue factor pathway inhibitor 2	TFPI2	1	7	7	7	7	7	7	38.3	26.934	235	0.91033	1.1701	0.94855	1.1399	3513300000	779940000	773480000	972010000	987870000
Probable ATP-dependent RNA helicase DDX60-like	DDX60L	7	35	35	24	31	24	31	23.4	197.67	1706	0.90335	1.161	1.0984	1.4263	1894700000	318060000	291210000	605930000	679470000
Lysine-specific demethylase 2A	KDM2A	6	17	17	13	17	13	17	18.2	132.79	1162	0.87665	1.1603	0.82307	1.0558	2384200000	584970000	544790000	706580000	547820000
U4/U6 small nuclear ribonucleoprotein Prp4	PRPF4	2	11	11	10	11	10	11	28.4	58.32	521	0.8906	1.1583	0.8475	1.0435	2636600000	576140000	531130000	819130000	710190000
60S ribosomal protein L28	RPL28	8	4	4	2	4	2	4	18.2	19.072	170	0.97783	1.1559	0.8993	1.0285	956050000	163200000	164180000	476840000	151830000
DNA-3-methyladenine glycosylase	MPG	5	8	8	6	8	6	8	37.8	27.295	251	0.88097	1.1533	0.56105	0.69598	2394600000	640010000	555800000	768320000	430510000
60S acidic ribosomal protein P0;60S acidic ribosomal protein P0-like	RPLP0;RPLP0P6	14	5	5	3	4	3	4	24.3	34.273	317	0.98451	1.1523	1.0266	1.1606	117440000	25918000	22185000	34176000	35165000
60S ribosomal protein L22-like 1	RPL22L1	3	3	3	3	3	3	3	39.7	14.478	121	0.91472	1.1495	1.0021	1.2143	923930000	290240000	317390000	143880000	172410000
CCAAT/enhancer-binding protein zeta	CEBPZ	3	22	22	14	19	14	19	25.6	114.16	998	0.89296	1.1476	0.97468	1.3212	1444000000	324000000	236480000	416620000	466880000
60S ribosomal protein L36a	RPL36A;RPL36A-HNRNPH2	3	8	2	8	8	2	2	46.2	12.441	106	0.97266	1.1407	0.94137	1.0451	1624000000	132650000	140490000	697540000	653310000
Peptidyl-prolyl cis-trans isomerase G;Peptidyl-prolyl cis-trans isomerase	PPIG	8	8	8	7	8	7	8	20.5	51.715	448	0.86548	1.14	0.81471	1.0301	1654500000	404920000	353250000	466140000	430190000
Probable ATP-dependent RNA helicase DDX10	DDX10	3	20	20	15	16	15	16	28.9	100.89	875	0.88539	1.1391	0.92028	1.2384	1383800000	318180000	268070000	393750000	403810000
40S ribosomal protein S8	RPS8	2	10	10	10	8	10	8	51.1	21.879	188	0.93972	1.138	0.88066	1.0672	28804000000	7199100000	7050000000	7657900000	6897200000
Cystatin-B	CSTB	1	5	5	4	5	4	5	79.6	11.139	98	0.92754	1.1337	0.88356	1.0696	6458700000	1416300000	1446900000	1823600000	1772000000
60S ribosomal protein L37a	RPL37A	4	4	4	3	4	3	4	57.4	7.624	68	0.98759	1.1313	0.95681	1.0522	9692000000	1525800000	1475700000	3387500000	3303000000
40S ribosomal protein S18	RPS18	2	4	4	4	3	4	3	23.7	17.718	152	0.92759	1.1268	0.8782	1.0903	493390000	113650000	108480000	147880000	123370000
Arginine and glutamate-rich protein 1	ARGLU1	3	10	10	6	10	6	10	20.5	33.216	273	0.90036	1.1253	0.88822	1.129	8782700000	2240800000	2061300000	2354100000	2126600000
Serine/threonine-protein kinase PRP4 homolog	PRPF4B	4	29	29	27	29	27	29	30.8	116.99	1007	0.89775	1.1191	0.8838	1.145	30087000000	6657100000	6199800000	8960800000	8269700000
Phosphatidylinositol 5-phosphate 4-kinase type-2 gamma	PIP4K2C	7	12	12	9	8	9	8	33	47.299	421	0.84331	1.118	0.81991	0.96333	1070300000	319620000	300580000	236580000	213530000
Vang-like protein 1	VANGL1	2	11	11	8	8	8	8	27.4	59.747	522	0.84739	1.1178	0.96317	1.1905	771290000	138870000	193800000	234010000	204620000
Periodic tryptophan protein 1 homolog	PWP1	6	11	11	9	8	9	8	29.3	55.827	501	0.85414	1.1175	0.8351	0.98827	3331200000	824990000	784190000	952420000	769590000
60S ribosomal protein L7	RPL7	4	11	11	9	8	9	8	35.1	29.225	248	0.89365	1.115	0.87125	1.079	2295100000	555310000	548950000	618980000	571850000
	RPL10	1	12	1	11	10	1	1	57.7	18.592	163	0.85392	1.1134	0.86311	1.0722	2020800000	482490000	420430000	606510000	511380000
60S ribosomal protein L36a-like	RPL36AL	1	8	2	7	8	1	2	46.2	12.469	106	0.92839	1.1126	0.9025	1.0444	21594000000	3382200000	3292100000	7782300000	7137100000
40S ribosomal protein S24	RPS24	5	5	5	5	5	5	5	35.9	15.197	131	0.85994	1.1109	0.89351	1.0359	4653700000	1352300000	1234200000	1113400000	953790000
60S ribosomal protein L10	RPL10	4	13	2	12	11	2	2	49.1	24.604	214	0.87895	1.1098	0.88797	1.0779	41825000000	11431000000	10343000000	10437000000	9613800000
Unconventional myosin-Ic	MYO1C	6	11	11	6	9	6	9	15.6	118.99	1039	0.84029	1.1091	0.37871	0.51882	292590000	49480000	34593000	112240000	96275000
78 kDa glucose-regulated protein	HSPA5	2	26	25	21	25	20	24	46.9	72.332	654	0.89838	1.1066	0.73463	0.90482	7892800000	2241100000	1925100000	2081300000	1645300000
Phosphatidylinositol 5-phosphate 4-kinase type-2 alpha	PIP4K2A	5	12	9	12	9	9	8	33.7	46.224	406	0.90312	1.1025	0.88215	1.0849	2130000000	595280000	518820000	541750000	474130000
60S ribosomal protein L27a	RPL27A	4	6	6	5	6	5	6	40.7	12.201	108	0.91008	1.0966	0.86712	0.99735	11304000000	2720800000	2542800000	3168900000	2871500000
Splicing factor U2AF 65 kDa subunit	U2AF2	2	6	6	4	6	4	6	17.2	53.12	471	0.82039	1.0937	0.5859	0.76218	632220000	155610000	150310000	205410000	120880000
Chromodomain-helicase-DNA-binding protein 3	CHD3	9	11	9	3	11	1	9	7.8	222.86	1966	0.86478	1.092	0.82061	1.057	320770000	29905000	24570000	142470000	123820000
Cathepsin K	CTSK	3	8	8	8	8	8	8	40.7	36.966	329	0.92014	1.0913	0.88319	1.0518	5387500000	1362300000	1277700000	1443700000	1303900000
60S ribosomal protein L26	RPL26	2	14	3	13	13	3	3	55.9	17.258	145	0.882	1.0902	0.87592	1.0207	36092000000	8476800000	7776900000	10414000000	9424300000
Zinc finger protein 148	ZNF148	7	38	38	36	37	36	37	66.2	88.975	794	0.84994	1.09	0.70734	0.90291	57496000000	13185000000	11723000000	18710000000	13879000000
Acidic fibroblast growth factor intracellular-binding protein	FIBP	5	10	10	9	10	9	10	35.9	41.21	357	0.91788	1.0899	0.7543	0.86719	1004300000	221760000	202540000	322590000	257400000
Ribosome biogenesis protein NSA2 homolog	NSA2	2	9	9	7	8	7	8	36.5	30.065	260	0.90321	1.088	0.89601	1.0502	1596300000	409140000	360990000	440160000	385960000
Transcription termination factor 1	TTF1	2	25	25	22	25	22	25	37.1	100.82	882	0.82119	1.0833	0.81332	1.0568	7954700000	1649200000	1399500000	2704800000	2201300000
Histone H1.0;Histone H1.0, N-terminally processed	H1F0	3	7	7	4	7	4	7	27.8	20.863	194	0.92597	1.0827	0.94614	1.0785	9766500000	2254100000	2173500000	2709800000	2629100000
Trifunctional enzyme subunit beta, mitochondrial;3-ketoacyl-CoA thiolase	HADHB	7	16	16	15	15	15	15	37.6	48.879	452	0.84045	1.0825	0.8891	1.0871	4534200000	1169600000	966980000	1286900000	1110800000
Splicing factor U2AF 35 kDa subunit;Splicing factor U2AF 26 kDa subunit	U2AF1;U2AF1L4	6	2	2	2	2	2	2	10.4	27.872	240	0.88116	1.0821	0.59685	0.69488	556370000	77283000	66330000	253440000	159310000
ATP-dependent RNA helicase DHX36	DHX36	7	39	39	36	38	36	38	42.4	114.76	1008	0.8347	1.0798	0.77621	1.0199	24784000000	5309100000	4434800000	8335900000	6704700000
40S ribosomal protein S23	RPS23	5	8	8	8	7	8	7	53.1	15.807	143	0.92166	1.0789	0.89754	1.0042	13218000000	2976300000	2856400000	3871400000	3513800000
RNA polymerase I-specific transcription initiation factor RRN3	RRN3	8	9	9	8	6	8	6	15	70.875	618	0.93096	1.0787	0.75209	0.97539	367170000	87937000	70262000	128230000	80734000
Trifunctional enzyme subunit alpha, mitochondrial;Long-chain enoyl-CoA hydratase;Long chain 3-hydroxyacyl-CoA dehydrogenase	HADHA	3	23	23	21	20	21	20	41	82.999	763	0.90387	1.0758	0.87425	1.0603	6562300000	1476500000	1333200000	1751900000	2000600000
TATA box-binding protein-associated factor RNA polymerase I subunit B	TAF1B	7	13	13	11	12	11	12	29.1	68.831	588	0.86865	1.0757	0.75511	0.93614	3389300000	832190000	736660000	1020600000	799880000
EF-hand calcium-binding domain-containing protein 11	EFCAB11	8	6	6	6	5	6	5	33.8	16.292	139	0.90255	1.0742	0.74016	0.89984	364300000	87322000	73430000	117390000	86159000
28S ribosomal protein S15, mitochondrial	MRPS15	1	4	4	4	3	4	3	14	29.842	257	0.81622	1.0686	0.89209	1.102	321420000	97534000	73840000	82137000	67906000
60S ribosomal protein L17	RPL17	2	8	8	8	7	8	7	42.9	21.397	184	0.91248	1.0647	0.8946	0.98459	14268000000	3761000000	3213500000	3892000000	3401900000
Single-stranded DNA-binding protein, mitochondrial	SSBP1	3	6	6	4	5	4	5	50	17.259	148	0.9149	1.0595	0.52608	0.58752	629390000	125820000	128660000	241850000	133060000
60S ribosomal protein L15;Ribosomal protein L15	RPL15	5	7	7	5	7	5	7	26.5	24.146	204	0.84405	1.0582	0.77863	0.96111	1190700000	272690000	217940000	378980000	321050000
Round spermatid basic protein 1-like protein	RSBN1L	3	27	25	23	25	21	24	33.3	94.868	846	0.86943	1.0572	0.88069	1.0788	12741000000	3080900000	2587700000	3720500000	3351800000
Zinc finger and BTB domain-containing protein 2	ZBTB2	1	21	20	20	19	19	19	56	57.336	514	0.86153	1.0555	0.87472	1.0729	16227000000	3903800000	3322100000	4832200000	4169100000
Heat shock cognate 71 kDa protein	HSPA8	18	21	18	19	19	16	16	37.8	70.897	646	0.8421	1.055	0.75208	0.94051	8367300000	2057400000	1760800000	2579000000	1970100000
Stress-70 protein, mitochondrial	HSPA9	7	27	27	25	24	25	24	46	72.4	665	0.83963	1.0543	0.72073	0.89544	10337000000	2797500000	2396700000	3051000000	2091900000
TATA-box-binding protein;TATA box-binding protein-like protein 2	TBP;TBPL2	6	7	7	6	6	6	6	26.9	34.751	316	0.88232	1.0528	0.70934	0.87618	2112700000	485620000	417330000	668930000	540820000
40S ribosomal protein S6	RPS6	3	12	12	11	12	11	12	41	28.68	249	0.86183	1.0514	0.85937	1.0291	27326000000	6777400000	5712800000	8101500000	6734100000
Nucleolar complex protein 3 homolog	NOC3L	3	18	18	12	18	12	18	26.6	92.623	800	0.82892	1.0487	0.85762	1.0759	2019000000	446410000	384410000	609260000	578950000
Nucleolar complex protein 2 homolog	NOC2L	1	4	4	4	4	4	4	5.7	84.918	749	0.80088	1.0462	0.83006	1.0771	174320000	36890000	39757000	53087000	44587000
Zinc finger protein basonuclin-2	BNC2	11	9	9	6	9	6	9	9.8	111.44	1004	0.77157	1.0449	0.74265	0.97369	1194900000	111980000	455510000	191540000	435910000
Protein ELYS	AHCTF1	2	13	13	9	10	9	10	7	252.5	2266	0.82327	1.0439	1.2596	1.6616	479810000	118300000	92557000	120890000	148060000
Krueppel-like factor 16	KLF16	1	11	11	10	11	10	11	70.2	25.43	252	0.81384	1.0435	0.67368	0.85354	7930100000	1939600000	1487900000	2744900000	1757700000
Syntenin-1	SDCBP	6	6	6	5	5	5	5	31.2	31.761	292	0.88805	1.0407	0.55031	0.67673	124240000	38093000	33783000	34075000	18292000
40S ribosomal protein S30	FAU	2	2	2	2	2	2	2	11.2	10.905	98	0.86436	1.0394	0.8654	1.0039	3188000000	881710000	763220000	822350000	720680000
Serine/arginine-rich splicing factor 5	SRSF5	6	7	6	6	7	5	6	22.8	31.263	272	0.81393	1.0374	0.74229	0.95386	2331200000	448790000	394910000	828190000	659340000
Zinc finger protein 696	ZNF696	1	1	1	1	1	1	1	2.4	40.575	374	0.79397	1.0367	0.68904	0.92859	1199200000	289750000	224410000	382080000	302930000
Probable ATP-dependent RNA helicase DDX46	DDX46	2	6	6	3	4	3	4	5.8	117.36	1031	0.75471	1.0355	0.59534	0.80636	177240000	28074000	30156000	66636000	52376000
Nucleolar protein 58	NOP58	2	31	31	31	30	31	30	57.5	59.578	529	0.83448	1.0353	0.89867	1.135	56568000000	14670000000	12589000000	15204000000	14105000000
Krueppel-like factor 13	KLF13	2	12	12	10	11	10	11	47.9	31.18	288	0.76041	1.0336	0.74608	0.92531	5082700000	1392100000	1090800000	1499100000	1100600000
DNA damage-binding protein 1	DDB1	19	23	23	14	23	14	23	26.1	126.97	1140	0.81171	1.0327	0.56456	0.73987	1562700000	225170000	153820000	736190000	447490000
Beta-1,3-galactosyltransferase 6	B3GALT6	1	4	4	4	3	4	3	14.3	37.137	329	0.80583	1.032	1.0525	1.3445	218580000	58585000	44721000	54119000	61156000
Serine/arginine-rich splicing factor 7	SRSF7	7	7	6	7	7	6	6	41.2	18.841	165	0.739	1.0316	0.7123	0.89464	3169700000	863950000	510380000	933510000	861860000
RuvB-like 1	RUVBL1	3	7	7	6	4	6	4	21.1	50.227	456	0.87252	1.0299	1.0203	1.2219	239900000	84654000	76533000	38257000	40457000
U4/U6 small nuclear ribonucleoprotein Prp3	PRPF3	3	18	18	11	16	11	16	32.4	77.528	683	0.84657	1.0279	0.75739	0.97721	2673100000	563370000	514470000	858100000	737160000
60S ribosomal protein L24	RPL24	3	13	13	10	12	10	12	56.7	17.779	157	0.87704	1.0276	0.8792	0.97542	56416000000	15303000000	14520000000	13736000000	12857000000
TATA box-binding protein-associated factor RNA polymerase I subunit D	TAF1D	4	11	11	8	9	8	9	42.4	32.057	278	0.80844	1.0276	0.75633	0.93039	2003200000	431870000	383030000	663660000	524680000
Histone H1.2	HIST1H1C	1	24	6	24	22	6	5	50.2	21.364	213	0.86362	1.0213	0.84009	1.0138	153590000000	56466000000	50096000000	25465000000	21566000000
60S ribosomal protein L7a	RPL7A	3	15	15	15	15	15	15	41	29.995	266	0.85295	1.0207	0.87729	0.98153	19973000000	5604100000	4990000000	4961300000	4417800000
DNA topoisomerase 1	TOP1	10	88	82	85	79	79	73	65.6	90.725	765	0.8207	1.0201	0.8104	1.0154	2174300000000	535900000000	467500000000	627730000000	543140000000
TATA box-binding protein-associated factor RNA polymerase I subunit A	TAF1A	5	15	15	14	14	14	14	39.8	52.675	450	0.83851	1.0183	0.80926	0.96005	3656600000	1025600000	884920000	950370000	795700000
Protein SFI1 homolog	SFI1	9	11	11	2	11	2	11	13.9	129.01	1089	0.7856	1.0128	0.81003	1.037	427810000	29313000	19775000	225340000	153380000
60S ribosomal protein L13	RPL13	2	10	10	7	10	7	10	40.3	24.261	211	0.78623	1.0127	0.80661	1.0477	13286000000	4158400000	3198200000	3375400000	2553700000
Round spermatid basic protein 1	RSBN1	3	23	21	21	21	19	20	34.9	90.071	802	0.83529	1.0124	0.82252	1.0561	6509200000	1413900000	1382000000	1902100000	1811200000
ALS2 C-terminal-like protein	ALS2CL	4	1	1	1	1	1	1	3.7	34.998	300	0.86677	1.0123	0.9296	1.0923	6072000000	1355100000	1259600000	1829300000	1628100000
60S ribosomal protein L34	RPL34	1	2	2	2	2	2	2	16.2	13.293	117	0.8114	1.0097	0.7638	0.93548	77340000	13214000	11798000	28961000	23366000
DNA topoisomerase I, mitochondrial	TOP1MT	5	7	1	7	7	1	1	9.1	58.644	503	0.84987	1.0085	0.88656	1.0866	371420000	87778000	80018000	102290000	101330000
N-acetyltransferase 10	NAT10	1	43	2	40	43	2	2	70.3	69.919	617	0.75251	1.0061	0.76536	1.024	3107800000	770310000	594090000	999310000	744080000
Protein FAM92A1	FAM92A1	12	3	3	2	2	2	2	13.5	28.996	251	0.76428	1.0049	0.76391	0.98094	44698000	12762000	8105700	13981000	9848700
Histone H1.1	HIST1H1A	1	19	10	17	19	8	10	50.7	21.842	215	0.80104	1.0038	0.77144	0.94779	9916400000	3105100000	2489300000	2453200000	1868800000
Atherin	SAMD1	3	14	14	13	12	13	12	35.9	56.051	538	0.76351	1.0028	0.68732	0.89407	8347000000	2281700000	1782300000	2419200000	1863700000
TATA box-binding protein-associated factor RNA polymerase I subunit C	TAF1C	8	25	25	23	23	23	23	38.7	85.041	776	0.77476	1.0018	0.70677	0.8444	5159300000	1495800000	1124300000	1525000000	1014300000
40S ribosomal protein S26;Putative 40S ribosomal protein S26-like 1	RPS26;RPS26P11	3	5	5	5	3	5	3	45.2	13.015	115	0.82413	1.0008	0.80665	0.92358	3346400000	680710000	570210000	1108800000	986750000
PR domain zinc finger protein 10	PRDM10	9	12	12	9	12	9	12	12.5	126.98	1117	0.74078	0.99885	0.74259	0.95092	968760000	154560000	126230000	404160000	283810000
TBC1 domain family member 10B	TBC1D10B	2	10	10	9	9	9	9	16.3	87.198	808	0.78669	0.99742	0.77633	1.0167	922020000	295070000	242370000	226770000	157810000
60S ribosomal protein L19	RPL19	1	14	14	14	13	14	13	45.9	23.466	196	0.80919	0.9941	0.82626	0.97728	99005000000	27060000000	23094000000	25135000000	23716000000
Signal recognition particle 14 kDa protein	SRP14	2	10	9	9	9	9	8	47.8	14.57	136	0.81758	0.99282	0.81342	0.94747	62709000000	15567000000	12429000000	18989000000	15724000000
Myb/SANT-like DNA-binding domain-containing protein 3	MSANTD3	1	4	4	2	4	2	4	13.5	32.363	275	0.84746	0.99181	0.9754	1.1587	421350000	104620000	90448000	116310000	109970000
Dynein light chain 1, cytoplasmic;Dynein light chain 2, cytoplasmic	DYNLL1;DYNLL2	5	3	3	2	3	2	3	49.4	10.366	89	0.83148	0.99146	0.81699	0.97366	1342100000	317130000	260320000	405380000	359310000
Centrin-3	CETN3	6	5	5	5	5	5	5	44.2	18.336	156	0.82618	0.98792	0.82996	0.94532	3933500000	962440000	876130000	1126300000	968650000
Cyclin-dependent-like kinase 5	CDK5	2	7	6	5	6	5	5	22.9	33.304	292	0.83794	0.9879	0.78421	0.98155	299540000	80266000	71043000	82970000	65266000
Signal recognition particle subunit SRP72	SRP72	4	7	7	6	5	6	5	12.8	74.605	671	0.81701	0.98777	1.1784	1.3986	746510000	216380000	143290000	239290000	147550000
60S ribosomal protein L18	RPL18	7	4	4	4	3	4	3	28.7	18.756	164	0.85203	0.98721	0.92164	1.1086	506580000	218160000	144080000	71124000	73215000
Signal recognition particle 9 kDa protein	SRP9	3	6	6	6	5	6	5	54.7	10.112	86	0.80648	0.98406	0.79667	0.95268	28177000000	7408900000	6037400000	8100500000	6630600000
28S ribosomal protein S5, mitochondrial	MRPS5	2	6	6	6	6	6	6	15.3	48.006	430	0.74001	0.98141	0.80016	1.0395	570190000	183460000	140230000	138540000	107960000
Lysine-specific demethylase 2B	KDM2B;FBXL10	17	30	10	22	30	7	10	21	152.61	1336	0.73373	0.98061	0.90596	1.1725	3557700000	737000000	538990000	1208100000	1073600000
Luc7-like protein 3	LUC7L3	8	7	7	6	7	6	7	37.7	27.017	236	0.76802	0.98045	0.79303	1.0174	1444100000	381190000	303520000	375530000	383840000
RuvB-like 2	RUVBL2	2	6	6	3	4	3	4	15.3	51.156	463	0.75861	0.9793	1.0895	1.3504	211360000	37794000	26309000	70389000	76868000
Leucine-rich repeat-containing protein 59	LRRC59	1	9	9	8	7	8	7	32.9	34.93	307	0.84083	0.97558	0.91806	1.0533	1196100000	310310000	246670000	320400000	318710000
Histone H1.5	HIST1H1B	1	20	12	20	18	12	11	42.9	22.58	226	0.79161	0.9742	0.84932	0.98747	104270000000	33583000000	28548000000	22597000000	19542000000
Retinitis pigmentosa 9 protein	RP9	2	7	7	7	7	7	7	30.3	26.106	221	0.78268	0.97385	0.78919	0.99528	1400800000	357450000	274410000	431960000	337010000
G patch domain-containing protein 8	GPATCH8	2	7	7	5	7	5	7	5.8	155.19	1424	0.81295	0.97022	0.86233	1.0927	450550000	108850000	84955000	148540000	108210000
Zinc finger protein 638	ZNF638	10	23	23	12	21	12	21	15.2	220.62	1978	0.7819	0.97008	1.1866	1.612	1155300000	207740000	169200000	378950000	399450000
rRNA-processing protein UTP23 homolog	UTP23	6	6	6	5	6	5	6	34.1	28.402	249	0.76691	0.96969	0.72644	0.84905	1457500000	348780000	256270000	488820000	363660000
Surfeit locus protein 6	SURF6	1	11	11	9	11	9	11	33.8	41.45	361	0.77462	0.96957	0.84462	0.98946	4557200000	1275000000	1030000000	1231300000	1021000000
NHP2-like protein 1;NHP2-like protein 1, N-terminally processed	NHP2L1	2	9	9	9	8	9	8	53.9	14.173	128	0.79435	0.96774	0.88443	0.99042	12124000000	3427000000	2836500000	3072100000	2788800000
Lysine-rich nucleolar protein 1	KNOP1	1	38	38	34	37	34	37	64.8	51.588	458	0.76658	0.96741	0.80147	0.99074	40943000000	9640400000	7725000000	13135000000	10443000000
PAX3- and PAX7-binding protein 1	PAXBP1	4	5	5	2	4	2	4	8.8	104.8	917	0.74329	0.96549	0.47904	0.65063	81470000	8756400	8337900	44772000	19603000
60S ribosomal protein L27	RPL27	1	7	7	7	7	7	7	46.3	15.798	136	0.77266	0.96509	0.78275	0.95891	23062000000	5211600000	4478600000	7151000000	6221200000
Neuroguidin	NGDN	4	5	5	5	4	5	4	22.5	35.25	311	0.73205	0.96481	0.644	0.7633	300900000	73396000	61243000	98428000	67828000
Treacle protein	TCOF1	4	107	0	91	104	0	0	62.4	156.06	1525	0.76825	0.9646	0.72969	0.9398	418320000000	97979000000	80601000000	134950000000	104790000000
60S ribosomal protein L3	RPL3	6	21	21	18	19	18	19	50.9	46.108	403	0.76885	0.96429	0.9515	1.1783	17410000000	4223300000	3179500000	5206900000	4800200000
Protein SCAF11	SCAF11	4	4	4	3	4	3	4	4.2	142.6	1271	0.77573	0.96416	0.86762	1.1466	105960000	17448000	13469000	41356000	33688000
40S ribosomal protein S15	RPS15	1	2	2	2	2	2	2	9	17.04	145	0.78571	0.96329	0.85552	1.1647	482750000	116490000	95374000	143550000	127330000
ADP-ribosylation factor-like protein 6-interacting protein 4	ARL6IP4	10	5	5	4	4	4	4	26.5	23.687	211	0.79274	0.96327	0.82628	0.98602	1716500000	423850000	365390000	499830000	427450000
DNA polymerase subunit gamma-1	POLG	2	14	14	10	13	10	13	14.8	139.56	1239	0.72154	0.96251	0.89744	1.2056	772190000	148420000	111510000	266210000	246050000
La-related protein 7	LARP7	5	13	13	11	11	11	11	28.2	66.898	582	0.72344	0.96195	0.73166	0.91922	1410200000	367280000	364470000	391410000	287060000
60S ribosomal protein L23a	RPL23A	3	12	12	11	12	11	12	49.4	17.695	156	0.82396	0.96162	0.85904	0.98469	151110000000	37990000000	32211000000	43579000000	37335000000
Protein FAM111A	FAM111A	3	17	17	12	16	12	16	38.8	70.195	611	0.75235	0.96155	0.76262	0.98359	2701900000	656360000	472910000	873850000	698730000
Cell growth-regulating nucleolar protein	LYAR	2	26	26	23	24	23	24	55.7	43.614	379	0.76718	0.96138	0.74586	0.9386	70510000000	19066000000	15097000000	20680000000	15665000000
40S ribosomal protein S4, X isoform;40S ribosomal protein S4, Y isoform 1	RPS4X;RPS4Y1	6	14	14	14	13	14	13	50.2	29.597	263	0.74439	0.96059	0.90743	1.1027	8396800000	2780000000	2151400000	1769200000	1696300000
60S ribosomal protein L32	RPL32	3	6	6	6	4	6	4	45.1	15.616	133	0.83339	0.96009	0.88393	0.98883	1451200000	368390000	299960000	508750000	274140000
Zinc finger MYND domain-containing protein 11	ZMYND11	12	11	11	10	8	10	8	29.9	59.665	508	0.73419	0.95917	0.90268	1.171	926510000	308710000	208320000	230420000	179070000
Pre-mRNA-processing factor 19	PRPF19	5	7	7	6	5	6	5	15.1	55.18	504	0.7231	0.95812	1.0028	1.2458	1046800000	359280000	263450000	218080000	206000000
Protein SREK1IP1	SREK1IP1	1	4	4	3	2	3	2	35.5	18.177	155	0.72676	0.95663	0.82571	0.97004	661680000	52675000	39131000	319720000	250150000
Corepressor interacting with RBPJ 1	CIR1	3	10	10	9	10	9	10	28.9	52.313	450	0.71673	0.9565	0.72173	0.93526	3812200000	980610000	650540000	1315100000	865920000
40S ribosomal protein S3a	RPS3A	13	13	13	11	12	11	12	48.1	29.945	264	0.76502	0.95507	1.0112	1.1802	5135600000	1239300000	925730000	1511000000	1459600000
Heat shock 70 kDa protein 1A/1B	HSPA1A	10	7	3	7	6	3	3	13.4	77.405	708	0.7536	0.95497	0.69938	0.8721	281350000	62164000	50974000	102210000	66007000
	LOC102288414	2	2	2	2	2	2	2	21.2	11.6	99	0.75127	0.95484	0.75044	0.90787	8822900000	2532300000	1843600000	2523700000	1923300000
ATP-dependent RNA helicase DDX50	DDX50	2	27	25	24	25	22	23	41.5	79.946	711	0.75306	0.95411	0.92473	1.1666	7894900000	2123600000	1600300000	2139100000	2031900000
DnaJ homolog subfamily A member 3, mitochondrial	DNAJA3	3	3	3	2	2	2	2	9.7	49.611	453	0.76535	0.95018	0.89232	1.157	112430000	35832000	24308000	25095000	27191000
F-actin-capping protein subunit alpha-1;F-actin-capping protein subunit alpha-2	CAPZA1;CAPZA2	7	3	3	2	3	2	3	14.7	32.922	286	0.76645	0.95002	0.63965	0.79046	139460000	40413000	30555000	38909000	29579000
Transcription factor AP-2-alpha;Transcription factor AP-2-beta	TFAP2A;TFAP2B	9	4	4	3	2	3	2	12.5	47.183	431	0.76652	0.94961	0.60081	0.71766	146610000	50158000	44874000	29917000	21658000
N-acetyltransferase 10	NAT10	4	68	27	65	66	27	25	72.1	115.73	1025	0.74681	0.94739	0.73347	0.93814	728630000000	171940000000	132390000000	239620000000	184680000000
G patch domain-containing protein 4	GPATCH4	7	28	28	26	26	26	26	54.7	50.381	446	0.7347	0.94601	0.74165	0.95095	14379000000	3931000000	2964100000	4263400000	3220900000
Eukaryotic translation initiation factor 5B	EIF5B	1	9	9	9	8	9	8	9.3	138.83	1220	0.78279	0.94447	0.89052	1.0977	995620000	270980000	229950000	262890000	231800000
Lethal(3)malignant brain tumor-like protein 3	L3MBTL3	8	24	24	18	23	18	23	38.9	85.756	755	0.72703	0.9437	0.70943	0.92207	8006700000	1943300000	1599000000	2578500000	1885900000
Zinc finger X-chromosomal protein;Zinc finger Y-chromosomal protein	ZFX;ZFY	14	11	11	8	10	8	10	22.4	66.065	576	0.75523	0.94217	1.1343	1.4454	1881400000	385850000	279820000	551430000	664320000
60S ribosomal protein L38	RPL38	1	5	5	5	5	5	5	50	8.2178	70	0.80745	0.94003	0.93349	1.0589	3016600000	763770000	625240000	838110000	789480000
Treacle protein	TCOF1	2	106	0	90	103	0	0	63.3	152.2	1489	0.7109	0.93941	0.67983	0.90842	4634700000	1032700000	754000000	1663000000	1185000000
Myb-binding protein 1A	MYBBP1A	3	48	48	42	46	42	46	39.7	148.85	1328	0.73972	0.93877	0.86449	1.1369	14250000000	3165000000	2319500000	4120600000	4645100000
Multiple myeloma tumor-associated protein 2	MMTAG2	4	14	14	11	13	11	13	51.3	29.411	263	0.77087	0.93403	0.78055	0.94214	12632000000	3437000000	2537300000	3709600000	2948400000
60S ribosomal protein L26-like 1	RPL26L1	3	13	2	12	12	2	2	55.2	17.256	145	0.76196	0.93244	0.71597	0.82243	915980000	219460000	165710000	304080000	226720000
Ribosome-binding protein 1	RRBP1	20	30	30	24	29	24	29	26.5	152.47	1410	0.71541	0.92986	0.86199	1.1461	2216300000	490070000	369690000	707410000	649120000
Ribosomal RNA processing protein 1 homolog B	RRP1B	3	43	43	42	41	42	41	64.3	82.175	740	0.72505	0.92847	0.75167	0.973	160000000000	42988000000	32447000000	47422000000	37146000000
Nucleolar protein 56	NOP56	5	46	46	42	44	42	44	82	66.049	594	0.73669	0.92793	0.90956	1.1599	156330000000	39855000000	31270000000	43746000000	41459000000
RNA-binding motif protein, X-linked 2	RBMX2	3	6	6	4	6	4	6	21.5	31.576	275	0.70068	0.9273	0.83195	1.0494	802240000	217450000	132600000	247250000	204950000
Putative RNA-binding protein Luc7-like 2;UPF0562 protein C7orf55	LUC7L2;C7orf55	8	11	6	10	9	5	6	28.3	46.513	392	0.75096	0.92711	0.86023	1.0379	1983700000	554360000	449560000	531180000	448640000
Ribonucleases P/MRP protein subunit POP1	POP1	2	13	13	7	13	7	13	18.4	114.71	1024	0.70644	0.92525	0.82659	1.1055	921280000	154290000	105350000	359900000	301740000
Zinc finger protein 281	ZNF281	3	17	17	17	14	17	14	25.6	96.914	895	0.77396	0.92451	0.65956	0.85843	2153400000	758670000	463420000	545170000	386140000
Dimethyladenosine transferase 1, mitochondrial	TFB1M	1	7	7	6	7	6	7	23.7	39.542	346	0.73904	0.92407	0.88234	1.0807	576060000	139750000	102400000	178680000	155220000
Importin subunit alpha-5;Importin subunit alpha-5, N-terminally processed;Importin subunit alpha-6	KPNA1;KPNA5	8	6	3	6	5	3	3	14.9	60.221	538	0.79675	0.92357	0.73886	0.95927	464300000	130160000	109340000	127230000	97565000
Serine/arginine repetitive matrix protein 1	SRRM1	5	24	24	22	22	22	22	24.6	103.39	913	0.71136	0.92323	0.6356	0.80361	28551000000	6429700000	4877700000	10382000000	6861200000
40S ribosomal protein S11	RPS11	1	6	6	6	5	6	5	36.1	18.431	158	0.75273	0.92299	0.95478	1.1625	1683800000	489380000	371630000	397650000	425110000
5-3 exoribonuclease 2	XRN2	3	8	8	3	6	3	6	12.4	102.42	896	0.71348	0.92143	0.47857	0.63176	182230000	28043000	19105000	100750000	34326000
Importin subunit alpha-1	KPNA2	1	5	5	3	2	3	2	12.7	57.861	529	0.78503	0.92131	0.61683	0.79022	114650000	34045000	32353000	27045000	21207000
Zinc finger protein 335	ZNF335	3	8	8	5	7	5	7	8.8	123.4	1119	0.67331	0.92042	0.96861	1.2765	245190000	45511000	35366000	77313000	86998000
Barrier-to-autointegration factor;Barrier-to-autointegration factor, N-terminally processed	BANF1	1	4	4	3	4	3	4	48.3	10.058	89	0.79789	0.92001	0.85947	0.96682	1849800000	577300000	462290000	427420000	382840000
Acetyl-CoA carboxylase 1;Biotin carboxylase	ACACA	10	6	6	2	5	2	5	4.2	257.24	2268	0.68005	0.91974	1.1088	1.4647	107660000	22122000	12504000	32443000	40595000
Histone H2B type 2-E;Histone H2B type 1-B;Histone H2B type 1-O;Histone H2B type 1-J;Histone H2B type 3-B	HIST2H2BE;HIST1H2BB;HIST1H2BO;HIST1H2BJ;HIST3H2BB	7	9	2	7	9	2	2	56.3	13.92	126	0.80011	0.91942	0.75927	0.86679	1645200000	380910000	299430000	532370000	432440000
H/ACA ribonucleoprotein complex subunit 2	NHP2	4	7	7	5	7	5	7	60.1	17.201	153	0.74849	0.91908	0.89567	1.0177	2889200000	431320000	350190000	1097700000	1010000000
Heterogeneous nuclear ribonucleoprotein U-like protein 2	HNRNPUL2	1	3	3	2	3	2	3	6.7	85.104	747	0.70877	0.91853	0.95554	1.1542	101660000	28857000	13392000	28403000	31013000
Eukaryotic translation initiation factor 6	EIF6	5	7	7	7	6	7	6	46.5	26.599	245	0.7014	0.9172	0.71374	0.87419	1839000000	530050000	383840000	535240000	389830000
BUD13 homolog	BUD13	2	4	4	3	4	3	4	6.9	70.52	619	0.6888	0.91323	0.76568	0.99579	338430000	77998000	59877000	104980000	95582000
Tubulin alpha-1C chain;Tubulin alpha-1B chain;Tubulin alpha-1A chain;Tubulin alpha-3C/D chain;Tubulin alpha-3E chain;Tubulin alpha-4A chain	TUBA1C;TUBA1B;KLK9;TUBA1A;TUBA3C;TUBA3E;TUBA4A	36	8	8	7	7	7	7	21.2	57.73	519	0.76033	0.91167	0.79407	1.0023	859050000	260330000	201210000	223340000	174170000
DNA-directed RNA polymerase I subunit RPA49	POLR1E	4	24	24	19	20	19	20	67.8	47.26	419	0.76699	0.90854	0.90186	1.0929	22720000000	6298900000	4814700000	6182500000	5423600000
C2 domain-containing protein 5	C2CD5	10	10	10	6	9	6	9	12.3	110.45	1000	0.66187	0.90627	0.70697	0.94036	405760000	65862000	47968000	161940000	129990000
Propionyl-CoA carboxylase alpha chain, mitochondrial	PCCA	10	22	22	16	18	16	18	36.3	80.058	728	0.71272	0.90435	0.79547	1.0126	2092100000	536440000	396440000	626300000	532950000
Protein FAM133B;Protein FAM133A	FAM133B;FAM133A	5	4	4	4	4	4	4	35.2	12.41	105	0.67791	0.90373	0.71774	0.90905	1296500000	325180000	262360000	397220000	311710000
Protein LLP homolog	LLPH	1	6	6	4	5	4	5	45	15.225	129	0.77364	0.90107	0.71703	0.8199	2325300000	576130000	429810000	771320000	548080000
Protein DEK	DEK	7	12	12	12	12	12	12	31.7	42.674	375	0.74726	0.89593	1.0541	1.2672	4354400000	1239500000	997480000	990280000	1127200000
Ribosomal RNA processing protein 1 homolog A	RRP1	3	19	19	17	18	17	18	36.4	52.839	461	0.67407	0.89489	0.78333	0.98383	4378100000	1098100000	817620000	1343100000	1119200000
SWI/SNF-related matrix-associated actin-dependent regulator of chromatin subfamily A member 5	SMARCA5	2	9	4	5	7	2	3	8.8	116.78	995	0.68149	0.89419	1.0734	1.3764	92573000	20133000	13932000	24861000	33647000
ATPase family AAA domain-containing protein 5	ATAD5	2	11	11	6	10	6	10	8.4	207.57	1844	0.6701	0.89317	0.90486	1.1709	312140000	38648000	28637000	138990000	105860000
Zinc finger protein 639	ZNF639	3	11	11	9	10	9	10	23.5	56.054	485	0.68528	0.89262	0.82707	0.98351	1002200000	216240000	183480000	327060000	275380000
rRNA/tRNA 2-O-methyltransferase fibrillarin-like protein 1	FBLL1	1	6	2	6	6	2	2	18	34.675	333	0.67904	0.89241	0.80771	1.0369	10668000000	3001700000	2169800000	2933100000	2563600000
CXXC-type zinc finger protein 5	CXXC5	12	4	4	3	3	3	3	15.8	32.977	322	0.68519	0.89237	0.55937	0.69737	398660000	117060000	90406000	122360000	68838000
60S ribosomal protein L35a	RPL35A	4	3	3	3	2	3	2	29.8	10.645	94	0.77162	0.89186	0.86804	0.9824	606220000	166860000	124790000	165520000	149060000
Histone H2A.V;Histone H2A.Z;Histone H2A	H2AFV;H2AFZ	10	4	3	4	3	3	2	48.4	13.509	128	0.72394	0.89036	0.68059	0.79542	18045000000	4620300000	3454400000	5573200000	4397400000
rRNA 2-O-methyltransferase fibrillarin	FBL	1	23	19	19	22	15	18	63.6	33.784	321	0.7111	0.88771	0.87445	1.0402	86383000000	22606000000	16823000000	24176000000	22778000000
Tubulin beta chain;Tubulin beta-4B chain;Tubulin beta-2B chain;Tubulin beta-2A chain;Tubulin beta-8 chain;Tubulin beta-8 chain-like protein LOC260334	TUBB;TUBB4B;TUBB2B;TUBB2A;TUBB8	28	4	2	4	4	2	2	13.2	41.742	372	0.65676	0.88737	0.68306	0.89223	369700000	122590000	85571000	100970000	60573000
40S ribosomal protein S9	RPS9	5	11	11	9	9	9	9	46.4	22.591	194	0.68967	0.88722	0.96153	1.1725	3941700000	1221500000	858450000	948760000	912990000
DNA topoisomerase 2-beta;DNA topoisomerase 2	TOP2B	4	70	58	59	69	47	58	44.6	182.66	1621	0.6821	0.88665	0.7455	0.97557	24650000000	5216600000	3597100000	10156000000	5679900000
Probable ATP-dependent RNA helicase DDX27	DDX27	2	33	33	27	32	27	32	43.8	89.834	796	0.7024	0.88604	0.70344	0.91353	15771000000	4305100000	3017600000	4948700000	3499900000
39S ribosomal protein L34, mitochondrial	MRPL34	1	2	2	2	2	2	2	23.9	10.165	92	0.72637	0.88565	0.66246	0.77733	297160000	77755000	70226000	86482000	62697000
Pyruvate carboxylase, mitochondrial	PC	4	61	61	55	59	55	59	70.5	129.63	1178	0.69328	0.88347	0.8673	1.1518	88616000000	20844000000	14656000000	28316000000	24799000000
Uncharacterized protein C12orf43	C12orf43	9	18	18	16	17	16	17	74.4	28.17	262	0.72743	0.8826	0.70388	0.85393	57107000000	15493000000	11204000000	17504000000	12906000000
60S ribosomal protein L13a	RPL13A	3	7	7	5	7	5	7	34.5	23.577	203	0.7703	0.88032	0.7667	0.888	2688300000	714820000	567030000	784240000	622190000
60S ribosomal protein L29	RPL29	1	2	2	2	2	2	2	14.5	17.752	159	0.76574	0.87902	0.73052	0.82951	2423100000	784050000	566830000	622330000	449900000
Zinc finger and BTB domain-containing protein 7B	ZBTB7B	1	13	13	10	13	10	13	33.2	58.026	539	0.66521	0.87828	0.71837	0.91833	6888200000	1447100000	1064300000	2540700000	1836100000
Nucleolar RNA helicase 2	DDX21	3	50	48	47	48	45	46	60	87.343	783	0.70802	0.87804	0.85622	1.0588	166260000000	45010000000	32980000000	46464000000	41804000000
Ubiquitin-60S ribosomal protein L40;Ubiquitin;60S ribosomal protein L40	UBA52	1	3	1	3	3	1	1	27.3	14.728	128	0.67515	0.87719	1.1078	1.4365	2226700000	553470000	359710000	642370000	671130000
Serine/threonine-protein phosphatase PP1-beta catalytic subunit;Serine/threonine-protein phosphatase	PPP1CB	4	16	5	16	16	5	5	56.9	37.186	327	0.66504	0.87532	0.59076	0.73164	675250000	163870000	110350000	251430000	149600000
Band 4.1-like protein 4B	EPB41L4B	3	5	4	4	3	3	2	10.4	58.566	518	0.68106	0.87485	0.7473	0.88844	157620000	47010000	38031000	40901000	31673000
Zinc finger and BTB domain-containing protein 25	ZBTB25	3	6	5	6	5	5	5	19.1	48.99	435	0.69283	0.87325	0.82906	0.97378	633750000	193730000	159160000	158330000	122530000
ATP-dependent RNA helicase DDX18	DDX18	2	36	36	30	31	30	31	58.5	75.406	670	0.71077	0.87301	0.82539	1.0167	56054000000	15118000000	10902000000	16037000000	13997000000
H/ACA ribonucleoprotein complex subunit 4	DKC1	4	27	27	26	23	26	23	56.8	57.673	514	0.71799	0.87173	0.93374	1.1766	23277000000	6607900000	4822900000	5998900000	5846900000
Ribosome biogenesis protein BRX1 homolog	BRIX1	1	21	21	18	19	18	19	57.8	41.401	353	0.69059	0.87027	0.66095	0.86211	18291000000	5334200000	3742600000	5476900000	3737600000
Probable U3 small nucleolar RNA-associated protein 11	UTP11L	2	7	7	5	6	5	6	28.5	30.446	253	0.74438	0.86638	0.723	0.80889	584480000	161830000	98598000	185800000	138260000
Serine/threonine-protein kinase TAO1	TAOK1	9	29	29	21	29	21	29	33.6	116.07	1001	0.67078	0.86228	0.91448	1.1972	4376000000	781390000	588340000	1477000000	1529300000
Rab11 family-interacting protein 5	RAB11FIP5	1	4	4	3	4	3	4	10	70.414	653	0.64773	0.86165	0.79696	1.0069	167110000	48131000	23681000	67021000	28274000
Thyroid transcription factor 1-associated protein 26	CCDC59	2	8	8	6	5	6	5	33.6	28.669	241	0.71744	0.8604	0.76973	0.91299	1462100000	428210000	322220000	398670000	313010000
Guanine nucleotide-binding protein-like 3	GNL3	5	27	27	25	27	25	27	47.3	60.54	537	0.69369	0.85974	0.6721	0.84347	41925000000	13110000000	8747400000	12116000000	7951900000
Zinc finger and BTB domain-containing protein 7A	ZBTB7A	1	22	22	22	22	22	22	48.1	61.438	584	0.67437	0.8581	0.74443	0.94307	43862000000	12694000000	8813700000	12852000000	9503000000
40S ribosomal protein S7	RPS7	2	3	3	2	3	2	3	22.5	21.312	187	0.74538	0.85606	1.125	1.2578	491010000	138660000	105440000	116610000	130290000
Three-prime repair exonuclease 1	TREX1	4	5	5	3	4	3	4	15.1	32.276	304	0.65113	0.85482	1.0649	1.3303	247520000	58336000	39491000	75579000	74115000
Probable ATP-dependent RNA helicase DHX37	DHX37	2	12	12	7	10	7	10	11.5	129.54	1157	0.62246	0.85421	0.86794	1.1642	436660000	114780000	70538000	128930000	122420000
Treacle protein	TCOF1	6	101	0	86	98	0	0	61.4	152.3	1488	0.65448	0.85379	0.61809	0.81356	897760000	179400000	130500000	358230000	229630000
Probable dimethyladenosine transferase	DIMT1	2	13	13	13	10	13	10	48.6	35.236	313	0.68306	0.85289	0.8872	1.0849	1793200000	527180000	386660000	442640000	436750000
Polynucleotide 5-hydroxyl-kinase NOL9	NOL9	1	11	11	11	7	11	7	20.4	79.322	702	0.6989	0.85275	0.63481	0.78756	749230000	232080000	151490000	216490000	149170000
Nucleolar protein 16	NOP16	6	8	8	7	6	7	6	42.7	21.188	178	0.65468	0.84924	0.77896	0.94783	1708000000	485090000	328880000	494710000	399300000
Serine/threonine-protein phosphatase;Serine/threonine-protein phosphatase PP1-gamma catalytic subunit;Serine/threonine-protein phosphatase PP1-alpha catalytic subunit	PPP1CC;PPP1CA	16	16	5	15	15	4	4	56.2	34.95	304	0.6825	0.84872	0.57113	0.69262	4448600000	1273200000	837000000	1499000000	839460000
Nucleolar GTP-binding protein 2	GNL2	3	20	20	17	18	17	18	30.1	83.654	731	0.67001	0.84689	1.0331	1.3145	3073200000	826720000	575520000	786680000	884260000
Annexin;Annexin A2;Putative annexin A2-like protein	ANXA2;ANXA2P2	16	2	2	2	2	2	2	22.7	13.01	119	0.72937	0.84659	0.88972	1.0084	120260000	18591000	64225000	15724000	21717000
Nucleolar protein 7	NOL7	2	7	7	6	6	6	6	19.1	29.426	257	0.74491	0.84598	0.7233	0.86301	1881000000	514650000	382940000	550940000	432500000
Protein AF-10	MLLT10	5	1	1	1	1	1	1	1.3	107.2	1011	0.70709	0.84581	0.83304	0.97799	2361100000	757370000	548650000	581200000	473850000
60S ribosomal protein L23	RPL23	3	6	6	5	6	5	6	44.3	14.865	140	0.72612	0.84564	0.82745	0.98829	3399300000	733880000	777800000	854770000	1032900000
60S ribosomal protein L8	RPL8	7	10	10	7	8	7	8	41.6	28.024	257	0.6528	0.84181	0.73039	0.92197	10260000000	2743900000	1962200000	3146700000	2407400000
Histone H2B type F-S	H2BFS	1	9	1	8	9	1	1	56.3	13.944	126	0.70118	0.84088	0.71878	0.85064	35761000000	9802100000	7268700000	10644000000	8046100000
DNA topoisomerase 2-alpha	TOP2A	6	81	69	73	79	61	68	49.2	178.88	1568	0.65434	0.83997	0.63359	0.84724	130490000000	31092000000	21480000000	46865000000	31057000000
60S ribosomal protein L18a	RPL18A	2	2	2	2	2	2	2	14.9	18.11	154	0.68982	0.83926	0.7804	0.91954	194940000	49153000	32637000	60730000	52422000
Serine/arginine-rich splicing factor 2	SRSF2	6	6	6	5	6	5	6	29.9	25.476	221	0.62078	0.8365	0.929	1.1918	2829400000	703620000	436790000	842140000	846870000
Nucleolar MIF4G domain-containing protein 1	NOM1	1	14	14	13	14	13	14	17.7	96.256	860	0.67761	0.83622	0.77692	1.0103	1121800000	344170000	218370000	305630000	253670000
Bifunctional lysine-specific demethylase and histidyl-hydroxylase MINA	MINA	6	6	6	6	6	6	6	16.3	52.8	465	0.65928	0.83391	0.74162	0.95689	457180000	135830000	86751000	126650000	107960000
RNA exonuclease 4	REXO4	2	8	8	5	7	5	7	20.4	46.671	422	0.65173	0.83384	0.87583	1.0322	641400000	171070000	110730000	194270000	165340000
DNA ligase 3	LIG3	2	4	4	3	4	3	4	5.3	106.02	949	0.66852	0.83209	0.71438	0.87754	266100000	66208000	50325000	82661000	66904000
Leydig cell tumor 10 kDa protein homolog	C19orf53	1	2	2	2	2	2	2	9.1	10.576	99	0.71053	0.82423	0.81795	0.92679	357720000	112410000	79635000	89630000	76046000
Mediator of DNA damage checkpoint protein 1	MDC1	15	24	24	14	21	14	21	26.8	197.57	1825	0.65912	0.81765	0.79164	1.0603	1714500000	371110000	382150000	534930000	426330000
rRNA-processing protein FCF1 homolog	FCF1	4	3	3	3	2	3	2	18	21.491	183	0.61951	0.81676	0.60535	0.7463	534900000	150430000	100330000	156150000	127990000
Probable global transcription activator SNF2L1	SMARCA1	4	9	4	4	8	1	4	9.2	117.26	1005	0.59938	0.81581	1.1708	1.5936	342620000	69259000	43891000	104630000	124840000
DNA-directed RNA polymerase I subunit RPA34	CD3EAP	2	13	13	11	13	11	13	41	54.985	510	0.68296	0.81459	0.7874	0.92094	4838600000	1008900000	685640000	1776600000	1367500000
E3 ubiquitin-protein ligase RING1	RING1	3	6	5	6	5	5	4	19.4	40.194	386	0.66972	0.8143	0.79201	0.96345	813100000	219070000	173500000	219270000	201250000
Polycomb group RING finger protein 1	PCGF1	2	10	10	9	9	9	9	47.5	30.346	259	0.70869	0.81141	0.80205	0.92467	2060100000	520510000	409120000	636390000	494050000
Probable rRNA-processing protein EBP2	EBNA1BP2	1	15	15	14	15	14	15	40.8	34.852	306	0.63627	0.80938	0.65563	0.82911	13677000000	3612500000	2307800000	4681900000	3074300000
Ribonuclease P protein subunit p30	RPP30	6	7	7	5	4	5	4	26.5	38.215	344	0.63489	0.80839	0.89134	1.0968	161180000	56058000	36142000	39823000	29160000
Probable ATP-dependent RNA helicase DDX52	DDX52	4	18	18	14	16	14	16	42.2	67.497	599	0.60822	0.80748	0.97614	1.2446	2323200000	655660000	450870000	622640000	594060000
60S ribosomal protein L31	RPL31	7	5	5	3	5	3	5	40.9	13.336	115	0.67829	0.80702	0.99118	1.1722	6556800000	1603400000	1085000000	1924700000	1943600000
40S ribosomal protein S13	RPS13	2	5	5	5	5	5	5	31.1	17.222	151	0.63537	0.80462	0.69065	0.82149	5880900000	1787300000	1121400000	1746100000	1226100000
ADP/ATP translocase 2;ADP/ATP translocase 2, N-terminally processed;ADP/ATP translocase 3;ADP/ATP translocase 3, N-terminally processed;ADP/ATP translocase 1	SLC25A5;SLC25A6;SLC25A4	3	6	4	4	6	3	4	20.8	32.852	298	0.6849	0.80442	0.87664	0.98931	262840000	59190000	40264000	77100000	86284000
60S ribosomal protein L14	RPL14	3	4	4	3	4	3	4	36.3	14.558	124	0.64687	0.80361	0.80678	0.96213	749520000	242190000	158660000	195440000	153230000
E3 ubiquitin-protein ligase ZFP91	ZFP91	2	3	3	2	3	2	3	5.5	59.57	529	0.61666	0.80082	0.92105	1.1583	393400000	116580000	60006000	133950000	82863000
Ribosome biogenesis protein BMS1 homolog	BMS1	1	10	10	6	9	6	9	9.5	145.81	1282	0.64313	0.79925	0.60886	0.78339	344530000	68337000	44476000	133170000	98541000
Probable ATP-dependent RNA helicase DDX41	DDX41	5	50	50	48	46	48	46	79.3	69.837	622	0.62588	0.79799	0.71708	0.89253	51068000000	14806000000	9965300000	15114000000	11183000000
RNA-binding protein 28	RBM28	3	7	7	3	6	3	6	12	69.922	618	0.65325	0.79669	1.0682	1.2968	196070000	27674000	21480000	76763000	70153000
Myc-associated zinc finger protein	MAZ	4	13	12	12	13	11	12	31.8	51.072	493	0.62652	0.7956	0.90864	1.1555	4142100000	1175300000	744570000	1155800000	1066300000
DNA polymerase subunit gamma-2, mitochondrial	POLG2	1	5	5	4	4	4	4	9.9	54.91	485	0.59769	0.79088	0.8085	1.0464	303030000	102630000	70244000	68995000	61166000
Collagen alpha-3(VI) chain	COL6A3	10	34	34	23	28	23	28	14.5	322.18	2976	0.5811	0.7884	0.7948	1.084	10524000000	284980000	193080000	427320000	9618500000
Protein SDA1 homolog	SDAD1	6	27	27	27	26	27	26	39.3	79.87	687	0.65962	0.78699	0.63736	0.78559	9535300000	2633400000	1789700000	3044200000	2068100000
H/ACA ribonucleoprotein complex subunit 3	NOP10	2	5	5	4	5	4	5	71.9	7.7059	64	0.6089	0.78571	0.86174	1.0409	5496900000	1476300000	1096800000	1495300000	1428400000
Holliday junction recognition protein	HJURP	4	8	8	4	6	4	6	18.1	64.277	570	0.59437	0.78469	0.59473	0.76805	245570000	67766000	37141000	91725000	48943000
Nucleolar protein 12	NOL12	1	11	11	10	10	10	10	48.8	24.663	213	0.63308	0.78423	0.7749	0.94938	1569100000	473090000	339050000	416340000	340630000
Pre-mRNA-splicing factor CWC25 homolog	CWC25	3	6	6	6	5	6	5	17.4	42.123	362	0.55696	0.78105	0.75654	1.0031	863220000	298910000	153570000	231080000	179670000
ATP-dependent RNA helicase DDX24	DDX24	7	37	37	32	34	32	34	51.8	96.331	859	0.59551	0.77845	0.79021	1.042	14515000000	3729900000	2283900000	4648400000	3852600000
Pescadillo homolog	PES1	5	13	13	10	10	10	10	28.9	66.077	571	0.60756	0.77614	0.64524	0.84012	1141600000	373860000	225120000	310620000	232000000
Cell division cycle 5-like protein	CDC5L	2	5	5	3	5	3	5	6.8	89.167	775	0.6485	0.77522	0.88345	1.1488	421110000	104180000	71950000	136380000	108600000
SRSF protein kinase 1	SRPK1	15	5	5	4	4	4	4	13.7	62.032	547	0.58873	0.77105	0.97068	1.2611	237030000	55451000	41593000	65563000	74427000
Runt-related transcription factor 1	RUNX1	16	3	3	2	3	2	3	11.7	27.775	256	0.58639	0.76784	0.74833	0.97124	159110000	39899000	23731000	50381000	45096000
Histone H1.3	HIST1H1D	1	22	4	22	21	4	4	47.1	22.35	221	0.66376	0.76741	0.67018	0.77071	13962000000	3470900000	2444700000	4690400000	3355600000
pre-rRNA processing protein FTSJ3	FTSJ3	1	27	27	25	25	25	25	39	96.557	847	0.60134	0.76628	0.62954	0.81546	12393000000	3252800000	2123800000	4227800000	2789100000
Vascular endothelial zinc finger 1	VEZF1	1	14	13	11	14	10	13	31.5	56.931	521	0.6482	0.76506	1.0496	1.2909	14019000000	3969700000	2625300000	3594000000	3830200000
Transcription factor COE1;Transcription factor COE3;Transcription factor COE2	EBF1;EBF3;EBF2	11	5	5	3	4	3	4	10.5	57.49	523	0.57658	0.76306	0.71694	0.93035	282620000	59108000	36116000	105190000	82206000
Signal recognition particle subunit SRP68	SRP68	8	5	5	4	5	4	5	12.7	60.284	526	0.5967	0.7575	0.83512	1.0633	230420000	53899000	50766000	65156000	60596000
Ribonuclease P protein subunit p29	POP4	2	3	3	3	3	3	3	14.1	25.424	220	0.64195	0.75273	0.79976	0.90673	100310000	28305000	18914000	29837000	23257000
Replication factor C subunit 3	RFC3	3	13	13	8	13	8	13	46.3	40.556	356	0.60954	0.74795	0.87468	1.0488	1096100000	228420000	144860000	364230000	358630000
Coiled-coil domain-containing protein 86	CCDC86	4	9	9	4	8	4	8	25.3	40.235	360	0.50118	0.74735	0.89741	1.1402	1136700000	231550000	141270000	399890000	364010000
Cancer/testis antigen family 45 member A4/A6;Cancer/testis antigen family 45 member A5;Cancer/testis antigen family 45 member A2;Cancer/testis antigen family 45 member A3;Cancer/testis antigen family 45 member A1	CT45A4;CT45A5;CT45A2;CT45A3;CT45A1	5	3	3	3	3	3	3	18.5	21.244	189	0.57012	0.74166	0.58124	0.71496	1354600000	442820000	264470000	396240000	251100000
Replication factor C subunit 5	RFC5	8	13	13	11	11	11	11	53.6	36.104	319	0.58364	0.73999	0.88387	1.063	1699300000	452230000	301280000	514700000	431140000
Intermediate conductance calcium-activated potassium channel protein 4	KCNN4	1	2	2	2	2	2	2	6.1	47.695	427	0.56876	0.73566	0.76382	1.006	43912000	11370000	8152000	12633000	11758000
60S ribosomal protein L6	RPL6	6	16	16	12	16	12	16	58	25.892	226	0.57999	0.73227	0.72587	0.87752	27856000000	8029600000	5041100000	8460600000	6324300000
HMG box transcription factor BBX	BBX	6	6	6	5	4	5	4	9.3	99.328	891	0.58388	0.73217	0.74026	0.98494	276830000	83744000	44420000	78114000	70547000
Nucleolar protein of 40 kDa	ZCCHC17	4	7	7	5	7	5	7	34.6	27.994	243	0.57831	0.72848	1.1041	1.3215	3819500000	1115800000	677940000	974770000	1050900000
Helicase-like transcription factor	HLTF	4	37	37	25	33	25	33	43.2	113.93	1009	0.54668	0.72827	0.77996	1.0861	4818800000	1094800000	590120000	1755400000	1378500000
BCL-6 corepressor	BCOR	6	14	14	8	13	8	13	12.7	186.23	1703	0.53181	0.7248	0.66597	0.85735	398320000	83908000	49746000	149730000	114940000
Histone H1x	H1FX	1	7	7	7	7	7	7	31.9	22.487	213	0.6311	0.72408	0.73373	0.81841	13090000000	3984600000	2640500000	3729600000	2735500000
Uncharacterized protein C9orf114	C9orf114	2	6	6	3	5	3	5	17	42.008	376	0.54838	0.72303	0.70918	0.92849	447930000	114150000	65861000	157040000	110870000
RNA-binding protein 39	RBM39;RNPC2	25	21	21	20	19	20	19	55.5	58.656	524	0.55533	0.72268	0.93376	1.1635	9754200000	2413300000	2827500000	2008500000	2504900000
Zinc finger protein 512B	ZNF512B	1	10	10	5	9	5	9	15.7	97.263	892	0.53051	0.72042	0.75153	1.0322	447460000	101090000	60908000	164540000	120920000
Sp110 nuclear body protein	SP110	12	12	12	7	12	7	12	25.6	61.739	547	0.54858	0.71854	1.0497	1.2693	957630000	232440000	155850000	285650000	283710000
Suppressor of SWI4 1 homolog	PPAN	7	5	5	3	4	3	4	12.6	51.872	460	0.55448	0.71844	0.73466	0.91076	217210000	48746000	23694000	83553000	61217000
UPF0428 protein CXorf56	CXorf56	3	4	4	3	3	3	3	31.2	19.981	173	0.61572	0.71828	0.5537	0.62767	144730000	46490000	29496000	44323000	24422000
Dolichol-phosphate mannosyltransferase subunit 1	DPM1	6	10	10	7	10	7	10	35.5	32.426	287	0.55025	0.71788	1.3192	1.6216	790400000	268860000	152730000	152810000	215990000
Histone H2A type 2-C;Histone H2A type 2-A;Histone H2A type 1-J;Histone H2A type 1-H;Histone H2A.J;Histone H2A type 1-C;Histone H2A type 3;Histone H2A type 1-D;Histone H2A type 1;Histone H2A type 1-B/E	HIST2H2AC;HIST2H2AA3;HIST1H2AJ;HIST1H2AH;H2AFJ;HIST1H2AC;HIST3H2A;HIST1H2AD;HIST1H2AG;HIST1H2AB	11	3	2	2	3	1	2	44.2	13.988	129	0.62503	0.71722	0.6368	0.72827	9026900000	2716600000	1956700000	2569500000	1784200000
S1 RNA-binding domain-containing protein 1	SRBD1	3	9	9	3	7	3	7	11.8	111.77	995	0.57663	0.71641	1.3714	1.8714	206810000	19591000	8779600	70047000	108400000
RNA 3-terminal phosphate cyclase-like protein	RCL1	5	10	10	4	10	4	10	32.4	40.842	373	0.60343	0.71618	0.74587	0.95648	411220000	76342000	51330000	148570000	134970000
Replication factor C subunit 1	RFC1	5	29	29	21	28	21	28	28.1	128.18	1147	0.54148	0.71508	0.84305	1.1157	3007100000	679690000	395410000	1037300000	894660000
Microtubule-associated protein 1A;MAP1A heavy chain;MAP1 light chain LC2	MAP1A	4	21	20	20	18	19	17	9.2	331.25	3041	0.60608	0.71486	0.73925	0.9217	9197700000	3164800000	1989000000	2265200000	1778700000
Histone H1.4	HIST1H1E	1	20	2	20	19	2	2	43.4	21.865	219	0.60625	0.71418	0.69016	0.79196	1434000000	477130000	338710000	350990000	267190000
Werner syndrome ATP-dependent helicase	WRN	1	11	11	6	7	6	7	8.6	162.46	1432	0.57133	0.70936	0.57512	0.73819	252910000	69203000	98503000	58376000	26832000
Lysine-specific demethylase PHF2	PHF2	3	11	10	7	11	6	10	15.4	120.77	1096	0.53965	0.70835	0.71349	0.95549	1125600000	353510000	76747000	420660000	274670000
39S ribosomal protein L24, mitochondrial	MRPL24	1	2	2	2	2	2	2	10.6	24.915	216	0.53925	0.7065	0.85004	1.0867	65418000	18120000	15428000	14619000	17251000
MKI67 FHA domain-interacting nucleolar phosphoprotein	NIFK	4	15	15	14	14	14	14	59	34.222	293	0.56863	0.70394	0.58783	0.72921	3679700000	1230300000	718970000	1066600000	663890000
Rab11 family-interacting protein 2	RAB11FIP2	6	7	7	7	5	7	5	19.1	58.278	512	0.57573	0.70363	0.64282	0.79261	314360000	108220000	62694000	83209000	60235000
U3 small nucleolar ribonucleoprotein protein IMP4	IMP4	6	9	9	9	9	9	9	31.1	31.835	280	0.5282	0.70105	0.90905	1.1927	3498200000	1107600000	580630000	932020000	877980000
Guanine nucleotide-binding protein-like 3-like protein	GNL3L	3	6	6	3	6	3	6	12.7	65.433	581	0.58751	0.69349	0.93869	1.1066	199340000	45735000	21806000	66718000	65084000
Death domain-associated protein 6	DAXX	5	10	10	6	9	6	9	18.9	78.332	710	0.53307	0.69063	1.1016	1.4296	958510000	254140000	124480000	260850000	319040000
H/ACA ribonucleoprotein complex subunit 1	GAR1	2	6	6	5	6	5	6	32.7	20.834	199	0.56759	0.68586	0.90163	1.0156	7809300000	2442500000	1710000000	1852400000	1804400000
Antigen KI-67	MKI67	3	166	14	133	159	11	13	62.2	358.62	3255	0.53073	0.68505	0.64156	0.86419	104560000000	25354000000	14509000000	38663000000	26037000000
Putative oxidoreductase GLYR1	GLYR1	5	6	6	5	5	5	5	18	52.558	484	0.57656	0.68439	1.1354	1.4079	564270000	164220000	102470000	145620000	151960000
Centrin-2	CETN2	2	12	12	9	12	9	12	65.1	19.738	172	0.59535	0.68246	1.0783	1.2097	9310100000	2175300000	1343800000	2748500000	3042500000
Nucleolar and coiled-body phosphoprotein 1	NOLC1	3	17	17	13	16	13	16	29.9	73.602	699	0.53742	0.67989	0.83149	1.0812	5220900000	1500500000	881990000	1529000000	1309400000
E3 ubiquitin-protein ligase TRIP12	TRIP12	8	49	6	42	48	4	6	30.7	225.52	2040	0.51085	0.67639	1.1498	1.5452	7011300000	1993200000	1040500000	1795900000	2181600000
BCL-6 corepressor-like protein 1	BCORL1	3	24	24	17	18	17	18	17.6	190.59	1785	0.52199	0.67474	0.55412	0.74306	1589000000	379840000	212240000	616600000	380340000
Probable ATP-dependent RNA helicase DDX31	DDX31	5	13	13	8	10	8	10	20.5	80.945	722	0.51268	0.67343	0.89773	1.0673	707660000	181790000	109600000	175700000	240560000
NF-kappa-B-activating protein	NKAP	2	10	10	9	9	9	9	33.3	47.138	415	0.49665	0.66835	0.62966	0.82067	2413000000	603540000	327480000	917620000	564310000
U3 small nucleolar ribonucleoprotein protein IMP3	IMP3	1	4	4	4	3	4	3	33.2	21.85	184	0.51398	0.66801	0.88016	1.0711	1447800000	476000000	268910000	363330000	339550000
Ribosomal RNA-processing protein 8	RRP8	3	4	4	4	3	4	3	13.8	50.714	456	0.50188	0.66541	0.80869	1.0072	177550000	60572000	34006000	48008000	34966000
Protein KRI1 homolog	KRI1	9	23	23	21	20	21	20	37.8	83.251	709	0.52506	0.66179	0.63919	0.82338	8815600000	2604700000	1393600000	2920700000	1896500000
Coiled-coil domain-containing protein 137	CCDC137	1	13	13	9	12	9	12	46.4	33.231	289	0.55291	0.65939	0.65399	0.79989	2526900000	842910000	204180000	1148200000	331590000
RRP12-like protein	RRP12	4	36	35	30	32	30	31	34.9	143.7	1297	0.48695	0.657	0.89272	1.1801	4636400000	1225300000	687240000	1423600000	1300300000
Ribosome production factor 2 homolog	RPF2	3	10	10	9	8	9	8	34.6	35.582	306	0.536	0.65679	0.52338	0.64133	1311200000	448060000	239200000	402850000	221090000
Replication factor C subunit 4	RFC4	8	12	12	10	12	10	12	42.1	39.681	363	0.53361	0.65611	0.90558	1.0671	1594500000	425100000	241070000	485580000	442720000
Bromodomain adjacent to zinc finger domain protein 1A	BAZ1A	4	16	16	7	15	7	15	12.9	178.7	1556	0.50681	0.6535	1.1493	1.5496	431370000	60375000	40396000	154710000	175890000
KRR1 small subunit processome component homolog	KRR1	2	16	16	15	15	15	15	37.3	43.664	381	0.55508	0.6499	0.66037	0.78793	12415000000	3781900000	2076700000	4002000000	2554700000
SPATS2-like protein	SPATS2L	10	24	1	21	21	1	1	49.6	61.728	558	0.54655	0.64424	1.1915	1.4714	9130800000	2609400000	1503900000	2308100000	2709500000
ATP-dependent RNA helicase DDX55	DDX55	5	10	10	7	10	7	10	22	65.19	569	0.50877	0.64248	1.0468	1.2974	930890000	190260000	105250000	312870000	322510000
PIN2/TERF1-interacting telomerase inhibitor 1;Transcription factor SOX-7	PINX1;SOX7	6	2	2	2	2	2	2	10.1	37.034	328	0.5479	0.63938	0.85283	1.0237	179730000	37879000	21606000	68275000	51970000
Replication factor C subunit 2	RFC2	3	13	13	8	12	8	12	43.8	39.157	354	0.52824	0.63339	0.88197	1.0965	684100000	139340000	76939000	244400000	223410000
E3 ubiquitin-protein ligase TRIP12	TRIP12	1	45	2	39	44	1	2	34.1	192.07	1722	0.47555	0.62493	1.1226	1.5135	296460000	69090000	36620000	85080000	105670000
DNA mismatch repair protein Msh2	MSH2	9	15	15	10	13	10	13	21.3	104.74	934	0.48603	0.61819	1.2145	1.5422	1142800000	317410000	146780000	315210000	363380000
PHD and RING finger domain-containing protein 1	PHRF1	5	4	4	2	3	2	3	3.3	178.22	1645	0.4772	0.6168	0.51809	0.66986	31636000	9607000	6011800	10607000	5409500
60S ribosomal protein L4	RPL4	4	18	18	17	18	17	18	46.8	45.498	406	0.51385	0.61272	0.87928	1.0966	22665000000	7704600000	3770000000	6007500000	5183100000
Splicing factor, arginine/serine-rich 19	SCAF1	1	4	4	4	3	4	3	3.3	139.27	1312	0.4457	0.60987	1.1688	1.5814	125160000	35014000	15646000	34596000	39907000
Histone H4	HIST1H4A	1	5	5	5	5	5	5	43.7	11.367	103	0.49366	0.60512	0.90936	1.0504	12683000000	4598000000	2442900000	2890000000	2752000000
Ribosomal L1 domain-containing protein 1	RSL1D1	2	14	14	13	13	13	13	34.1	54.972	490	0.47792	0.60451	1.4455	1.7355	3447700000	1146800000	573590000	709290000	1018000000
U3 small nucleolar ribonucleoprotein protein MPP10	MPHOSPH10	2	18	18	15	17	15	17	34.2	78.863	681	0.47788	0.59255	0.85332	1.0609	4111700000	1438100000	662420000	1061700000	949410000
Spermatogenesis-associated serine-rich protein 2	SPATS2	3	8	8	4	7	4	7	19.4	59.544	545	0.47336	0.58858	1.7573	2.1353	249850000	69953000	34692000	78971000	66231000
40S ribosomal protein S14	RPS14	3	5	5	5	5	5	5	36.4	16.273	151	0.4566	0.58582	0.56255	0.68798	4223500000	1267100000	579780000	1502200000	874490000
Ribosome biogenesis protein BOP1	BOP1	4	5	5	4	4	4	4	13.1	71.929	634	0.46212	0.58529	0.44869	0.58352	247650000	84384000	38245000	70916000	54106000
Centromere protein Q	CENPQ	1	2	2	2	2	2	2	9.3	30.595	268	0.47108	0.58106	0.90503	1.081	55980000	13908000	7593000	17596000	16883000
Krueppel-like factor 12	KLF12	3	7	6	7	6	6	5	29.6	44.187	402	0.42849	0.56988	1.0026	1.2784	3878300000	1278300000	563230000	994010000	1042700000
Glioma tumor suppressor candidate region gene 2 protein	GLTSCR2	3	7	7	5	6	5	6	18.6	52.633	472	0.4467	0.56983	0.64149	0.82722	533300000	140000000	76840000	156320000	160140000
Probable ATP-dependent RNA helicase DDX56	DDX56	4	5	5	4	4	4	4	12.8	57.274	507	0.45043	0.55968	0.87218	1.1341	183300000	65937000	29099000	39764000	48496000
Centromere protein P	CENPP	3	3	3	2	3	2	3	10.1	33.165	288	0.42285	0.55557	0.91562	1.1733	78000000	25599000	11155000	21769000	19478000
Protein NipSnap homolog 1	NIPSNAP1	3	4	4	4	4	4	4	15.1	33.31	284	0.43296	0.55142	1.4389	1.6117	586830000	183540000	84351000	145960000	172980000
Something about silencing protein 10	UTP3	1	14	14	11	13	11	13	31.1	54.557	479	0.42491	0.54901	0.82827	1.0705	2305800000	856890000	420560000	545540000	482820000
DNA mismatch repair protein Msh3	MSH3	2	26	26	20	23	20	23	30.3	126.72	1128	0.40487	0.54645	1.2048	1.6136	2182000000	542570000	247710000	627260000	764440000
Cytoskeleton-associated protein 4	CKAP4	1	6	6	5	5	5	5	14.8	66.022	602	0.46056	0.54602	1.5625	2.0445	157680000	67820000	19087000	24216000	46559000
RNA-binding protein 34	RBM34	5	10	10	10	7	10	7	25.6	48.564	430	0.42295	0.53099	1.1358	1.4489	738240000	289950000	125510000	140830000	181950000
Nuclear autoantigen Sp-100	SP100	17	5	4	4	4	4	3	5.9	100.42	879	0.39854	0.53076	1.778	2.3222	421830000	146550000	109890000	54669000	110720000
DnaJ homolog subfamily C member 9	DNAJC9	1	16	16	14	16	14	16	62.3	29.909	260	0.42225	0.52588	1.2376	1.4434	14289000000	4598300000	2190700000	3338500000	4161900000
High mobility group protein B1;Putative high mobility group protein B1-like 1	HMGB1;HMGB1P1	6	5	3	4	4	3	3	31	18.311	158	0.4178	0.5084	4.366	5.1985	240790000	85104000	65624000	13987000	76079000
Histone H3;Histone H3.3C;Histone H3.2;Histone H3.1t;Histone H3.3;Histone H3.1	H3F3A;HIST2H3PS2;H3F3C;HIST2H3A;HIST3H3;HIST1H3A	7	2	2	2	1	2	1	13	14.052	123	0.40869	0.50712	0.75746	1.0106	5907700000	2080800000	862550000	1652000000	1312300000
60S ribosome subunit biogenesis protein NIP7 homolog	NIP7	2	4	4	4	2	4	2	29.4	20.462	180	0.43281	0.50154	0.53648	0.59892	347160000	158000000	61132000	79311000	48720000
Nuclease-sensitive element-binding protein 1	YBX1	5	10	7	10	9	7	6	47.2	35.924	324	0.41125	0.49508	1.3098	1.6358	2482200000	854170000	356730000	563400000	707890000
Heterochromatin protein 1-binding protein 3	HP1BP3	8	17	17	13	15	13	15	36.7	61.206	553	0.39934	0.48769	1.4702	1.8193	4374800000	1200400000	519700000	1083700000	1571000000
Nucleolar and spindle-associated protein 1	NUSAP1	9	12	12	10	10	10	10	34.1	49.323	440	0.41219	0.48688	1.0307	1.2999	862130000	282120000	146090000	203830000	230090000
DNA repair protein complementing XP-C cells	XPC	6	40	40	33	38	33	38	43.6	105.95	940	0.37465	0.48125	1.2156	1.6117	30628000000	9801300000	3902200000	7228600000	9696300000
Heterogeneous nuclear ribonucleoprotein U	HNRNPU	4	17	17	11	15	11	15	26.9	90.583	825	0.35886	0.47834	1.8472	2.4286	3416600000	974490000	338990000	742970000	1360200000
UV excision repair protein RAD23 homolog B	RAD23B	6	17	15	16	17	14	15	56.2	43.171	409	0.37467	0.47098	1.318	1.6867	16027000000	5035200000	2136600000	3816100000	5038600000
Coiled-coil domain-containing protein 106	CCDC106	1	4	4	2	4	2	4	17.9	32.032	280	0.38022	0.47	0.81973	1.1071	115430000	28938000	10728000	41036000	34730000
ATP-binding cassette sub-family F member 1	ABCF1	9	23	22	14	23	14	22	36.8	95.925	845	0.36501	0.45166	2.0601	2.6993	2959000000	692070000	327820000	634640000	1304500000
Probable 28S rRNA (cytosine(4447)-C(5))-methyltransferase	NOP2	10	17	17	14	16	14	16	24.5	89.301	812	0.33401	0.4352	0.57764	0.75406	2855700000	734340000	265440000	1425900000	430040000
DNA dC->dU-editing enzyme APOBEC-3C;DNA dC->dU-editing enzyme APOBEC-3F;DNA dC->dU-editing enzyme APOBEC-3D	APOBEC3C;bK150C2.9;APOBEC3F;APOBEC3D	4	2	2	2	2	2	2	13.2	22.826	190	0.34007	0.43322	1.9385	2.3986	187680000	39474000	13050000	44709000	90443000
60S ribosomal protein L7-like 1	RPL7L1	2	4	4	4	2	4	2	18.3	28.661	246	0.35945	0.4171	0.56578	0.66817	352680000	143600000	54340000	93467000	61272000
ATP synthase subunit alpha, mitochondrial	ATP5A1	2	2	2	2	2	2	2	5	54.493	503	0.32955	0.41506	0.26098	0.32347	93791000	18612000	8116200	55193000	11869000
Antigen KI-67	MKI67	2	154	2	124	148	2	2	64.3	319.44	2896	0.30948	0.40798	0.42764	0.5778	184070000	42656000	17113000	83891000	40411000
Zinc finger CCCH-type antiviral protein 1	ZC3HAV1	5	4	4	3	3	3	3	8	77.902	699	0.30259	0.40771	2.8484	3.6612	69682000	31229000	7792300	9464500	21196000
FACT complex subunit SSRP1	SSRP1	1	4	4	4	2	4	2	6.5	81.074	709	0.31001	0.38314	1.2033	1.4292	158170000	78227000	27595000	23426000	28922000
Zinc finger protein 740	ZNF740	1	6	6	5	3	5	3	35.8	21.857	193	0.28977	0.38052	1.7386	2.1052	124430000	57271000	16375000	20100000	30689000
Nucleolin	NCL	7	22	22	21	20	21	20	29.6	76.613	710	0.31716	0.37645	2.3569	2.8484	12458000000	4378100000	1817200000	1880900000	4381700000
Krueppel-like factor 3	KLF3	2	4	3	4	2	3	1	15.9	38.828	345	0.27388	0.36106	1.0134	1.3942	125920000	55565000	16153000	29020000	25186000
ATP-dependent RNA helicase DDX54	DDX54	4	45	2	39	40	1	2	57.7	98.665	882	0.26632	0.34655	1.0545	1.3736	19475000000	9272200000	1959500000	4054800000	4189000000
Nucleolar transcription factor 1	UBTF	1	29	3	23	27	1	3	35.6	89.405	764	0.27017	0.32868	2.4794	3.1717	23972000000	8663800000	2335900000	3699500000	9273200000
Bloom syndrome protein	BLM	5	43	43	29	41	29	41	34.7	159	1417	0.21624	0.27137	1.4735	1.9157	5482000000	1414000000	337820000	1452800000	2277400000
Transcription factor A, mitochondrial	TFAM	2	8	8	8	6	8	6	26	29.096	246	0.22954	0.269	2.381	2.8584	1147700000	540950000	119970000	142680000	344060000
Poly(rC)-binding protein 1	PCBP1	1	12	8	10	10	8	6	43.3	37.497	356	0.21164	0.2664	1.978	2.3218	2346900000	864600000	195130000	440520000	846690000
E3 ubiquitin-protein ligase UHRF1	UHRF1	3	9	9	8	8	8	8	14.4	89.726	792	0.17795	0.22903	14.113	18.757	490410000	216480000	28288000	66977000	178670000
Heterogeneous nuclear ribonucleoprotein K	HNRNPK	7	18	18	14	17	14	17	48.8	47.557	428	0.19753	0.22299	2.6283	3.2558	3235600000	1282500000	280100000	444810000	1228200000
High mobility group protein B2	HMGB2	2	6	5	5	4	4	4	36.6	15.404	134	0.11794	0.13605	5.4824	6.1686	377800000	191140000	32076000	21886000	132690000
Poly(rC)-binding protein 2	PCBP2	38	11	7	9	8	7	4	43.3	33.8	321	0.116	0.13365	5.6812	6.2978	1029500000	496030000	54871000	80854000	397730000
THO complex subunit 4	ALYREF	2	4	4	4	3	4	3	22.2	26.888	257	0.086475	0.11347	0.5995	0.76752	856210000	654710000	67758000	78643000	55091000
Keratin, type II cytoskeletal 2 epidermal	KRT2	16	35	1	29	29	1	1	70	65.432	639	0.062861	0.076628	0.049683	0.065052	14103000000	5937400000	284620000	7646200000	234420000
ATPase family AAA domain-containing protein 3C;ATPase family AAA domain-containing protein 3B	ATAD3C;ATAD3B	5	1	1	1	1	1	1	2.5	31.469	279	0.046847	0.060127	0.090477	0.11447	1129900000	266090000	3756300	841740000	18294000
Dermcidin;Survival-promoting peptide;DCD-1	DCD	2	3	3	2	3	2	3	22.7	11.284	110	0.03909	0.048541	0.066869	0.087867	398410000	179360000	4985300	206800000	7268400
Trypsin-3	PRSS3	6	2	2	2	2	2	2	13.5	19.401	178	0.022732	0.028219	0.023194	0.02805	992330000	421510000	6127100	557090000	7598500
