# Supplementary material for: E4F1 and ZNF148 are transcriptional activators of the −57A > C and wild-type TERT promoter
Source: Genome Res. 2023 Nov;33(11):1893–905. doi: 10.1101/gr.277724.123 (PMC10760450; doi:10.1101/gr.277724.123)
Supplement: Supplement 5 [file Supplemental_Table_S5.xlsx]

## Sheet: Table S5 (-57A>C)
Table S5. MS data for SILAC-based in-vitro DNA reconstitution pull-downs using U87MG nuclear extract with -57A>C vs. WT TERT promoter probes
Protein names	Gene names	Number of proteins	Peptides	Unique peptides	Peptides for	Peptides rev	Unique peptides for	Unique peptides rev	Sequence coverage [%]	Mol. weight [kDa]	Sequence length	Ratio H/L for	Ratio H/L normalized for	Ratio H/L rev	Ratio H/L normalized rev	Intensity	Intensity L for	Intensity H for	Intensity L rev	Intensity H rev
Transcription factor E4F1	E4F1	3	13	13	9	11	9	11	27.9	83.495	784	7.1847	9.5946	0.047966	0.06069	1202200000	314620000	499110000	376730000	11722000
Pyruvate carboxylase, mitochondrial	PC	4	51	51	46	51	46	51	58.1	129.63	1178	1.5613	2.2384	0.35679	0.47623	37303000000	8594200000	9429300000	14366000000	4914200000
Zinc finger protein Rlf	RLF	2	3	3	2	2	2	2	1.9	217.95	1914	1.5822	2.2084	0.75757	0.98067	46440000	6812100	13799000	13827000	12002000
Zinc finger and BTB domain-containing protein 25	ZBTB25	3	4	4	4	2	4	2	12.2	48.99	435	1.7083	2.0739	0.49103	0.59944	201050000	54799000	84412000	43361000	18482000
Transcriptional activator protein Pur-beta	PURB	1	9	9	7	7	7	7	53.2	33.24	312	1.4692	1.9406	0.40495	0.45684	827330000	269490000	202390000	261880000	93571000
Zinc finger protein 292	ZNF292	3	20	20	17	15	17	15	10.3	288.28	2578	1.2887	1.8895	0.56058	0.72472	697420000	144130000	179750000	251350000	122180000
Myc proto-oncogene protein	MYC	4	2	2	2	2	2	2	4.3	46.573	420	1.417	1.8674	1.5371	1.8927	472730000	63573000	127960000	114120000	167080000
Serine/threonine-protein kinase TAO1	TAOK1	9	18	18	14	17	14	17	20.4	116.07	1001	1.2329	1.8631	0.48465	0.60897	1193100000	264970000	314660000	399250000	214220000
Deoxynucleotidyltransferase terminal-interacting protein 2	DNTTIP2	1	3	3	1	3	1	3	4.2	84.468	756	1.3482	1.7868	1.05	1.3221	115840000	21904000	33964000	29581000	30388000
Transcriptional activator protein Pur-alpha	PURA	1	6	6	5	5	5	5	32.3	34.91	322	1.2902	1.6922	0.37433	0.46675	602300000	94554000	146000000	255280000	106470000
Class E basic helix-loop-helix protein 41	BHLHE41	2	13	9	10	13	6	9	36.5	50.497	482	1.2397	1.6213	0.92423	1.1429	753910000	134400000	154750000	257500000	207270000
RNA-binding protein with serine-rich domain 1	RNPS1	3	2	2	2	2	2	2	10.1	30.354	268	1.1089	1.6022	1.0486	1.3465	113990000	31038000	26196000	27545000	29212000
Cystatin-B	CSTB	1	5	5	4	4	4	4	79.6	11.139	98	0.98819	1.5833	0.93082	1.0754	2824500000	653900000	671540000	777910000	721100000
Hypoxia-inducible factor 1-alpha	HIF1A	6	5	5	5	5	5	5	9.3	86.067	767	1.2557	1.5814	1.3801	1.6396	248260000	69101000	91607000	45244000	42307000
Zinc finger and BTB domain-containing protein 2	ZBTB2	1	16	16	15	12	15	12	45.5	57.336	514	1.2404	1.5566	0.5729	0.74323	9394500000	1867900000	2493900000	3202300000	1830400000
Upstream stimulatory factor 2	USF2	4	10	8	8	10	7	8	29	36.183	338	1.1873	1.5371	0.56424	0.70304	14193000000	2279500000	2791400000	5860200000	3261900000
Chromodomain-helicase-DNA-binding protein 2	CHD2	13	30	29	23	28	22	27	19	200.56	1739	1.0338	1.5219	0.92169	1.2235	4335000000	941330000	1297700000	1112600000	983360000
DNA polymerase subunit gamma-1	POLG	4	22	22	21	19	21	19	24.9	139.56	1239	1.0206	1.5131	0.63324	0.84145	2186900000	514830000	517240000	700640000	454200000
Class E basic helix-loop-helix protein 40	BHLHE40	1	13	9	10	11	6	7	36.4	45.51	412	1.1725	1.5105	0.72049	0.86926	2593300000	574580000	750180000	754660000	513900000
Serine beta-lactamase-like protein LACTB, mitochondrial	LACTB	3	19	19	19	19	19	19	45.3	60.693	547	1.2008	1.5064	1.2158	1.5215	4844000000	1084700000	1263100000	1097300000	1398900000
Upstream stimulatory factor 1	USF1	5	7	5	6	7	5	5	24.8	30.995	282	1.1742	1.5031	0.51679	0.65342	8253400000	2200500000	2628100000	2191200000	1233700000
Zinc finger protein 639	ZNF639	3	5	5	4	5	4	5	10.9	56.054	485	1.221	1.4866	0.58613	0.6964	486050000	89187000	109560000	177010000	110290000
DNA-directed RNA polymerases I, II, and III subunit RPABC3	POLR2H	6	4	4	3	4	3	4	33.6	16.996	149	0.66786	1.4552	0.93566	1.0422	1896000000	477740000	343240000	559230000	515830000
Probable ATP-dependent RNA helicase DDX60-like	DDX60L	7	59	58	51	53	50	52	40.6	197.67	1706	0.99572	1.4465	0.95409	1.2683	6487600000	1341300000	1331700000	2116100000	1698500000
Host cell factor 2	HCFC2	3	3	3	2	3	2	3	4.3	86.778	792	1.1095	1.4	0.96684	1.2503	116950000	24683000	26620000	30544000	35105000
40S ribosomal protein S25	RPS25	1	4	4	4	4	4	4	24	13.742	125	1.134	1.3909	1.2088	1.3499	1279600000	202990000	202400000	422670000	451590000
Vang-like protein 1	VANGL1	2	8	8	6	6	6	6	19.7	59.747	522	1.0316	1.3905	0.85135	0.98425	481700000	76905000	84244000	169270000	151280000
Transcription factor EB	TFEB	6	10	5	7	9	3	4	24.6	52.864	476	1.0448	1.3596	0.72305	0.85994	541900000	86912000	99366000	197380000	158240000
Heparan sulfate 2-O-sulfotransferase 1	HS2ST1	4	3	3	2	3	2	3	9	37.114	322	0.93509	1.3573	0.62685	0.85366	242020000	34522000	30274000	107190000	70030000
SWI/SNF-related matrix-associated actin-dependent regulator of chromatin subfamily A member 5	SMARCA5	2	26	15	22	18	12	11	24.1	116.78	995	0.8947	1.3554	0.55681	0.73181	1003000000	316130000	279160000	254500000	153190000
Methylcrotonoyl-CoA carboxylase subunit alpha, mitochondrial	MCCC1	8	3	3	2	3	2	3	9.9	47.546	426	1.0081	1.3543	1.0074	1.269	99494000	18023000	26079000	32463000	22929000
CDKN2A-interacting protein	CDKN2AIP	2	8	8	5	5	5	5	23.1	61.124	580	1.085	1.3432	0.67843	0.80906	184570000	50100000	41429000	47419000	45624000
Propionyl-CoA carboxylase alpha chain, mitochondrial	PCCA	6	12	12	7	11	7	11	22.9	77.047	702	1.0935	1.3422	0.59809	0.7545	741450000	126590000	144350000	295440000	175070000
Myb-related transcription factor, partner of profilin	MYPOP	1	2	2	2	2	2	2	5.8	42.508	399	1.0049	1.3387	0.84577	1.0682	176430000	44747000	48936000	40752000	41990000
Chromatin assembly factor 1 subunit B	CHAF1B	1	6	6	6	5	6	5	13.8	61.492	559	1.0583	1.325	0.87113	1.13	318090000	83901000	97516000	70917000	65754000
Histone-lysine N-methyltransferase 2A;MLL cleavage product N320;MLL cleavage product C180	KMT2A	4	37	36	25	31	25	30	13.5	427.73	3931	0.8412	1.3207	0.91509	1.206	1817600000	386890000	340640000	589100000	501010000
60S ribosomal protein L35	RPL35	3	6	6	4	6	4	6	40.7	14.551	123	1.0391	1.3059	1.0169	1.1852	5940100000	1097700000	1225300000	1762200000	1854900000
Mitochondrial import inner membrane translocase subunit Tim13	TIMM13	1	4	4	3	3	3	3	58.9	10.5	95	1.0661	1.3003	0.63873	0.74056	371260000	55437000	59091000	150060000	106670000
Microphthalmia-associated transcription factor	MITF	16	9	3	8	9	3	3	18.1	58.162	520	0.9412	1.2893	0.66386	0.83362	288620000	55080000	60664000	104040000	68841000
Nucleolar complex protein 3 homolog	NOC3L	3	19	19	16	17	16	17	28.8	92.623	800	0.94968	1.2869	0.74876	0.96271	1941300000	400120000	390970000	623000000	527170000
A-kinase anchor protein 17A	AKAP17A	3	3	3	2	2	2	2	4.3	80.735	695	0.97078	1.2617	1.0106	1.2097	57043000	14054000	12154000	13946000	16889000
Band 4.1-like protein 4B	EPB41L4B	3	3	3	2	2	2	2	6.4	58.566	518	0.93412	1.2556	0.7533	0.92188	104740000	22786000	19283000	34062000	28613000
60S ribosomal protein L27a	RPL27A	4	5	5	4	5	4	5	38.9	12.201	108	0.92027	1.2497	0.86809	1.0587	6261700000	1172800000	1053700000	2089800000	1945300000
Lysine-specific demethylase 2A	KDM2A	6	11	11	10	6	10	6	12.7	132.79	1162	0.9204	1.2469	0.62348	0.78718	725540000	185350000	169230000	231150000	139810000
Dehydrogenase/reductase SDR family member 2, mitochondrial	DHRS2	5	5	5	3	3	3	3	27.1	23.818	225	0.98519	1.2418	0.98092	1.2354	143150000	38537000	40021000	25782000	38806000
Bromodomain adjacent to zinc finger domain protein 1A	BAZ1A	4	29	29	25	26	25	26	24.1	178.7	1556	0.85411	1.2355	0.52288	0.68654	1791700000	419900000	375110000	652950000	343780000
Pre-mRNA-splicing factor SYF1	XAB2	2	3	3	3	2	3	2	4.7	99.679	852	0.92308	1.2315	0.86472	1.0836	111850000	47032000	26775000	21631000	16416000
Transcription factor E3	TFE3	9	17	12	13	16	9	11	32.9	61.52	575	0.93248	1.219	0.70294	0.85099	10232000000	2214700000	1918700000	3681900000	2417100000
Retinoblastoma-binding protein 5	RBBP5	2	5	5	4	4	4	4	12.2	55.071	500	0.95893	1.2163	1.0148	1.3433	574910000	139440000	127550000	143090000	164830000
Aryl hydrocarbon receptor nuclear translocator	ARNT	8	21	20	18	19	17	18	46.4	84.947	774	0.9029	1.2107	0.75527	0.95198	2390400000	506430000	488880000	768410000	626640000
Small nuclear ribonucleoprotein Sm D3	SNRPD3	2	3	3	2	3	2	3	21.7	13.291	120	0.72843	1.2095	1.1662	1.3019	766830000	126660000	86153000	264280000	289740000
Intron-binding protein aquarius	AQR	3	19	19	14	16	14	16	15.8	171.29	1485	0.81304	1.2086	1.0601	1.4196	760090000	168080000	117890000	225880000	248250000
Cytosolic carboxypeptidase 1	AGTPBP1	9	41	41	40	38	40	38	40.6	138.45	1226	0.85687	1.2033	0.87874	1.1566	12869000000	2942800000	2998600000	3259100000	3668600000
Arginine and glutamate-rich protein 1	ARGLU1	3	8	8	8	7	8	7	20.1	33.216	273	0.88638	1.2013	0.93527	1.2125	6016700000	1820300000	1601000000	1362600000	1232700000
Serine/threonine-protein kinase PRP4 homolog	PRPF4B	4	33	33	29	32	29	32	34	116.99	1007	0.8802	1.2006	0.92053	1.1631	34345000000	8797800000	8013500000	9065100000	8469000000
Protein max	MAX	4	8	1	7	8	1	1	52.3	17.202	151	0.91361	1.1989	0.75136	0.8857	3233700000	634000000	633160000	1098900000	867670000
60S ribosomal protein L21	RPL21	2	3	3	2	3	2	3	23.1	18.565	160	0.99767	1.1858	0.84705	0.97379	293610000	103450000	104470000	45900000	39782000
Arginine/serine-rich protein PNISR	PNISR	1	2	2	2	2	2	2	2.9	92.576	805	0.81182	1.1833	0.92918	1.2123	69404000	20822000	13107000	17331000	18145000
BEN domain-containing protein 3	BEND3	1	46	46	36	43	36	43	64.6	94.474	828	0.91454	1.1819	0.64736	0.80853	20846000000	5190200000	5458500000	5908600000	4288900000
Probable ATP-dependent RNA helicase DDX10	DDX10	3	18	18	8	17	8	17	25.1	96.454	835	0.87506	1.1763	0.84608	1.0995	1040600000	149070000	129850000	409410000	352320000
Lysine-specific demethylase 2B	KDM2B	18	47	47	39	40	39	40	37.6	152.61	1336	0.797	1.1727	0.84107	1.0793	6529200000	1564600000	1331700000	1954900000	1678100000
Histone H1.0;Histone H1.0, N-terminally processed	H1F0	3	4	4	4	3	4	3	22.6	19.168	177	1.0294	1.1627	0.95128	1.0829	5688200000	1355200000	1316800000	1535500000	1480700000
40S ribosomal protein S26;Putative 40S ribosomal protein S26-like 1	RPS26;RPS26P11	3	5	5	4	4	4	4	45.2	13.015	115	0.87301	1.1627	0.9433	1.0454	5940400000	1413400000	1228900000	1737200000	1560900000
40S ribosomal protein S8	RPS8	2	11	11	10	9	10	9	53.4	24.205	208	0.93789	1.1613	0.8856	1.0444	16672000000	4415900000	4202900000	4145300000	3907500000
G patch domain-containing protein 1	GPATCH1	1	11	11	10	5	10	5	16	103.34	931	0.76951	1.16	0.99172	1.3009	275090000	116340000	86444000	37079000	35229000
Round spermatid basic protein 1-like protein	RSBN1L	3	32	30	25	30	24	29	43.5	94.868	846	0.93802	1.1598	0.75456	0.94965	13115000000	2821400000	2563700000	4388000000	3342100000
Heterogeneous nuclear ribonucleoproteins C1/C2	HNRNPC	27	9	9	7	7	7	7	38.2	28.916	262	0.95377	1.1596	1.5412	1.7303	866440000	252140000	242620000	144200000	227490000
Dynein light chain 1, cytoplasmic;Dynein light chain 2, cytoplasmic	DYNLL1;DYNLL2	5	3	3	3	3	3	3	49.4	10.366	89	0.94138	1.1584	0.79886	0.8902	1542800000	184660000	180360000	675970000	501860000
ATP-dependent RNA helicase DHX8	DHX8	5	7	6	6	4	6	3	7.4	134	1181	0.8142	1.1543	0.85559	1.1009	87483000	27910000	20538000	20745000	18291000
Serine/arginine-rich splicing factor 11	SRSF11	5	3	3	3	3	3	3	11.8	42.316	389	0.77869	1.1508	0.75463	1.0215	143530000	35940000	22453000	49898000	35240000
Histone-lysine N-methyltransferase NSD2	WHSC1	9	4	4	2	3	2	3	4	152.26	1365	0.78538	1.1504	1.2478	1.6298	61628000	13786000	9444400	22466000	15931000
Charged multivesicular body protein 4b	CHMP4B	1	3	3	3	2	3	2	17.9	24.95	224	0.92298	1.1474	0.8101	0.96597	186670000	67944000	61890000	33335000	23506000
Histone H2A type 2-C;Histone H2A type 2-A;Histone H2A type 1-J;Histone H2A type 1-H;Histone H2A.J;Histone H2A type 1-D;Histone H2A type 1;Histone H2A;Histone H2A type 1-C;Histone H2A type 3;Histone H2A type 1-B/E	HIST2H2AC;HIST2H2AA3;HIST1H2AJ;HIST1H2AH;H2AFJ;HIST1H2AD;HIST1H2AG;HIST1H2AC;HIST3H2A;HIST1H2AB	15	5	3	4	5	2	3	58.1	13.988	129	0.65189	1.1458	0.63171	0.72855	26867000000	5700600000	4025700000	9726100000	7414400000
C2 domain-containing protein 5	C2CD5	10	10	10	8	7	8	7	13.3	110.45	1000	0.77357	1.1452	0.70591	0.92952	380000000	126370000	102910000	82852000	67859000
RNA-binding protein 4;RNA-binding protein 4B	RBM4;RBM4B	9	12	7	8	9	4	5	45.9	40.313	364	0.89943	1.1428	0.49278	0.59214	856000000	240290000	234400000	247100000	134200000
60S ribosomal protein L37a	RPL37A	5	5	5	5	4	5	4	69.1	7.624	68	0.95713	1.1422	0.95308	1.0586	13882000000	1401000000	1355500000	5620500000	5504700000
Cyclic AMP-responsive element-binding protein 3-like protein 1;Processed cyclic AMP-responsive element-binding protein 3-like protein 1	CREB3L1	3	8	6	6	8	4	6	19.8	57.005	519	0.90555	1.1416	0.6326	0.76831	485030000	86139000	70170000	191390000	137330000
60S ribosomal protein L38	RPL38	1	5	5	4	5	4	5	50	8.2178	70	0.8697	1.1404	0.86151	1.0262	2031000000	465790000	463870000	570550000	530750000
60S ribosomal protein L26	RPL26	2	12	3	10	10	2	3	47.6	17.258	145	0.86905	1.1401	0.89753	1.0682	17443000000	4677900000	4194600000	4498500000	4071800000
Round spermatid basic protein 1	RSBN1	3	27	25	22	25	21	24	45.6	90.071	802	0.89329	1.1398	0.72437	0.9158	9925900000	2054400000	1933800000	2971400000	2966200000
	RPL10	1	13	2	12	12	2	2	57.7	18.592	163	0.89114	1.1384	0.87245	1.0633	20385000000	5647800000	5310300000	4974600000	4452200000
40S ribosomal protein S6	RPS6	3	11	11	10	10	10	10	35.7	28.68	249	0.95003	1.1371	0.92692	1.0457	11901000000	3065900000	2724300000	3226300000	2884700000
Trifunctional enzyme subunit alpha, mitochondrial;Long-chain enoyl-CoA hydratase;Long chain 3-hydroxyacyl-CoA dehydrogenase	HADHA	3	22	22	18	19	18	19	40.2	82.999	763	0.89994	1.134	0.7838	0.92551	3204300000	725380000	647450000	972630000	858790000
DNA mismatch repair protein Msh3	MSH3	2	29	29	24	26	24	26	33.3	126.72	1128	0.77846	1.1297	0.65605	0.87597	2808700000	742830000	604210000	867120000	594550000
EF-hand calcium-binding domain-containing protein 11	EFCAB11	8	6	6	3	6	3	6	33.8	16.292	139	0.88871	1.1286	0.68335	0.82059	255230000	26758000	26267000	114940000	87263000
RuvB-like 2	RUVBL2	2	9	9	5	8	5	8	25.9	51.156	463	0.84586	1.1282	0.80153	0.9929	382120000	74940000	50552000	152850000	103780000
H/ACA ribonucleoprotein complex subunit 3	NOP10	2	5	5	4	5	4	5	71.9	7.7059	64	0.59547	1.1219	0.96448	1.1603	4753500000	374990000	230370000	2086500000	2061700000
N-acetyltransferase 10	NAT10	1	50	2	46	47	2	2	79.4	69.919	617	0.78201	1.1215	0.70949	0.94074	2858200000	845110000	730980000	734450000	547630000
Pre-mRNA-processing factor 40 homolog A	PRPF40A	5	3	3	3	2	3	2	4.1	95.096	826	0.74805	1.1209	0.91465	1.1686	104360000	37595000	28295000	20865000	17606000
Heterogeneous nuclear ribonucleoprotein U-like protein 1	HNRNPUL1	6	12	12	12	9	12	9	20.1	86.121	767	0.89555	1.1209	0.97228	1.2822	1516400000	455550000	410890000	302690000	347230000
Protein SFI1 homolog	SFI1	11	18	18	14	15	14	15	18.8	147.66	1242	0.74577	1.1178	0.69445	0.92183	1050100000	272430000	212460000	327420000	237750000
Transcription termination factor 1	TTF1	2	28	28	25	26	25	26	38.1	100.82	882	0.76605	1.1173	0.79889	1.0438	6500700000	1898900000	1549000000	1660600000	1392200000
Transcription initiation factor TFIID subunit 3	TAF3	2	20	20	19	18	19	18	24.4	103.58	929	0.75508	1.1131	1.0683	1.3778	7483100000	2159500000	1304500000	2199600000	1819400000
Chromatin assembly factor 1 subunit A	CHAF1A	4	6	6	6	2	6	2	8.2	106.92	956	0.74962	1.1095	0.53968	0.70746	185230000	67006000	57156000	38842000	22227000
60S ribosomal protein L28	RPL28	8	4	4	2	4	2	4	33.7	9.657	89	0.96533	1.109	0.96097	1.0782	793000000	27747000	29568000	504200000	231480000
60S ribosomal protein L17	RPL17	2	8	8	7	8	7	8	38	21.397	184	0.97556	1.1079	0.87363	0.97981	11233000000	3469000000	3263500000	2413000000	2087400000
40S ribosomal protein S30	FAU	2	2	2	2	2	2	2	11.2	10.905	98	0.91999	1.107	0.86962	1.041	2042500000	349320000	337610000	689170000	666390000
Zinc finger CCCH domain-containing protein 18	ZC3H18	4	10	10	8	10	8	10	13	108.94	977	0.73495	1.1057	0.96462	1.2812	639330000	159850000	127690000	179790000	172000000
Transcription factor AP-4	TFAP4	1	3	3	2	2	2	2	12.7	38.725	338	0.80583	1.1017	0.61057	0.75008	58532000	17865000	14049000	17936000	8682500
Serine/arginine-rich splicing factor 6	SRSF6	3	10	6	10	8	6	4	26.3	38.418	335	0.76158	1.1004	0.93278	1.2797	3527200000	1246900000	1046800000	634780000	598660000
Nucleolar protein 58	NOP58	2	32	32	29	32	29	32	61.2	59.578	529	0.88942	1.0993	0.87555	1.0786	49157000000	11376000000	10424000000	14581000000	12776000000
60S ribosomal protein L3	RPL3	6	22	22	17	21	17	21	44.7	46.108	403	0.88626	1.0978	0.88891	1.1183	19401000000	4419400000	3814700000	5980000000	5186900000
Transcription initiation factor TFIID subunit 2	TAF2	4	21	17	18	16	14	14	23	136.97	1199	0.74713	1.0963	1.2037	1.5534	1677700000	476870000	385100000	404220000	411550000
40S ribosomal protein S23	RPS23	5	7	7	6	6	6	6	49	15.807	143	0.92712	1.0959	0.85183	1.012	7666300000	1049600000	1042300000	2906400000	2668000000
Ribosome biogenesis protein NSA2 homolog	NSA2	2	10	10	10	7	10	7	44.2	30.065	260	0.91755	1.0926	0.92334	1.0679	1552500000	490150000	436280000	337700000	288390000
TATA box-binding protein-associated factor RNA polymerase I subunit D	TAF1D	4	7	7	6	7	6	7	34.2	32.057	278	0.84206	1.0907	0.78165	0.99183	1748200000	426730000	404070000	490030000	427410000
Tigger transposable element-derived protein 2	TIGD2	1	9	9	7	9	7	9	21.1	59.623	525	0.81585	1.0884	0.68577	0.86057	886470000	239470000	159310000	298100000	189580000
40S ribosomal protein S24	RPS24	5	5	5	5	5	5	5	35.9	15.197	131	0.88109	1.0853	0.88932	1.0216	5318500000	1217600000	1070100000	1608700000	1422200000
Transcription initiation factor TFIID subunit 1;Transcription initiation factor TFIID subunit 1-like	TAF1;TAF1L	10	56	56	48	50	48	50	39.4	214.71	1893	0.74229	1.0836	1.1434	1.4789	8648100000	2263600000	1666300000	2278400000	2439800000
DNA topoisomerase I, mitochondrial	TOP1MT	5	7	1	7	6	1	1	9.1	58.644	503	0.90284	1.0825	0.86372	1.0263	260420000	40074000	46954000	89780000	83612000
Histone-binding protein RBBP4	RBBP4	14	5	5	5	2	5	2	18.5	46.158	410	0.81998	1.0818	0.82251	1.0683	260460000	94430000	92393000	38442000	35196000
60S ribosomal protein L32	RPL32	4	6	6	4	6	4	6	46.6	15.616	133	0.90542	1.0809	0.80093	0.90951	2828100000	291080000	219650000	1278900000	1038500000
Cathepsin K	CTSK	2	8	7	6	8	6	7	42.6	36.966	329	0.91563	1.0807	0.87553	1.0092	3052200000	672070000	657110000	903890000	819170000
Histone H1.2	HIST1H1C	1	20	4	18	18	4	3	47.4	21.364	213	0.88879	1.0805	0.86119	1.0265	22236000000	7969100000	6382300000	4044900000	3839600000
Transformer-2 protein homolog beta	TRA2B	3	8	7	7	7	7	6	35.3	29.186	252	0.8565	1.079	1.2851	1.5765	2366300000	690110000	632880000	440290000	603040000
MAX gene-associated protein	MGA	1	92	1	83	77	1	1	44.3	315.22	2856	0.72334	1.0787	0.61487	0.82419	19128000000	4701800000	4384700000	5622200000	4418900000
Probable ATP-dependent RNA helicase DHX35	DHX35	5	6	6	2	6	2	6	9.9	76.046	679	0.878	1.0777	1.0905	1.4182	223510000	34567000	26596000	75224000	87119000
60S ribosomal protein L7	RPL7	4	8	8	6	7	6	7	31.9	29.225	248	0.8314	1.0776	0.8708	1.1021	1306600000	172620000	157900000	501100000	474990000
Serrate RNA effector molecule homolog	SRRT	7	18	18	12	14	12	14	23.5	96.221	839	0.76605	1.0763	1.0851	1.4218	1281100000	287850000	214200000	356960000	422050000
TATA box-binding protein-associated factor RNA polymerase I subunit A	TAF1A	5	14	14	13	12	13	12	35.8	52.675	450	0.88359	1.0733	0.82578	1.0272	2675500000	742190000	635540000	726220000	571540000
Aryl hydrocarbon receptor nuclear translocator-like protein 2	ARNTL2	8	20	3	19	18	3	3	34.6	69.23	622	0.82444	1.0718	0.80272	0.98879	5142300000	1357000000	1193500000	1452500000	1139300000
60S ribosomal protein L24	RPL24	3	13	13	7	13	7	13	64.5	14.369	121	0.90808	1.071	0.86676	0.97577	34020000000	9789500000	9538900000	7565600000	7125600000
TATA box-binding protein-associated factor RNA polymerase I subunit B	TAF1B	7	12	12	11	10	11	10	26.7	68.831	588	0.84675	1.0683	0.79145	0.97536	3725600000	1234000000	981420000	849090000	661160000
Pre-mRNA-processing-splicing factor 8	PRPF8	2	70	70	60	58	60	58	35.2	273.6	2335	0.73344	1.0679	0.98373	1.2913	9035900000	2654400000	1878500000	2271800000	2231200000
DNA-(apurinic or apyrimidinic site) lyase;DNA-(apurinic or apyrimidinic site) lyase, mitochondrial	APEX1	10	11	11	9	9	9	9	41.8	35.554	318	0.83839	1.0664	0.69701	0.84736	1998900000	480850000	399430000	499910000	618680000
N-acetyltransferase 10	NAT10	4	77	29	71	73	27	28	78.4	115.73	1025	0.78107	1.0637	0.70193	0.90531	579870000000	159040000000	130230000000	168100000000	122510000000
Transformer-2 protein homolog alpha	TRA2A	4	3	2	2	3	2	2	17.8	20.589	180	0.69828	1.0635	1.2969	1.6991	395250000	103890000	90256000	84241000	116860000
Transcriptional repressor CTCF	CTCF	10	6	6	3	6	3	6	8.7	82.785	727	0.80356	1.0635	0.95462	1.2178	160660000	24817000	21576000	61195000	53073000
Transcription factor E2F6	E2F6	8	12	12	10	8	10	8	49.8	31.844	281	0.87036	1.0621	0.67845	0.83785	1163600000	297880000	312670000	291210000	261850000
U5 small nuclear ribonucleoprotein 200 kDa helicase	SNRNP200	7	82	82	74	76	74	76	47.9	244.5	2136	0.72341	1.0611	1.0166	1.3351	15696000000	4460000000	3287200000	3917200000	4031800000
60S ribosomal protein L36a-like	RPL36AL	1	8	2	6	8	2	2	46.2	12.469	106	0.8188	1.0595	0.88471	1.0921	1811700000	123150000	169490000	688300000	830730000
E3 ubiquitin-protein ligase RBBP6	RBBP6	4	63	63	58	59	58	59	34.9	201.56	1792	0.72408	1.0595	0.89906	1.2091	38671000000	10071000000	7232500000	11748000000	9620400000
60S ribosomal protein L34	RPL34	1	4	4	2	3	2	3	22.2	13.293	117	0.82076	1.0593	0.81093	0.92152	206420000	7846100	5640300	106260000	86680000
60S ribosomal protein L7a	RPL7A	3	17	17	13	15	13	15	42.1	29.995	266	0.89032	1.059	0.84652	0.96595	13014000000	3765100000	3273500000	3206500000	2768800000
Myb-binding protein 1A	MYBBP1A	3	53	53	43	50	43	50	46.6	148.85	1328	0.72731	1.0581	0.78225	1.0408	12717000000	3135200000	2378500000	3635300000	3567600000
DNA polymerase subunit gamma-2, mitochondrial	POLG2	1	6	6	5	5	5	5	12.4	54.91	485	0.81842	1.0548	0.60454	0.75681	790640000	201030000	178180000	244780000	166650000
Transcription initiation factor TFIID subunit 5	TAF5	3	32	32	27	30	27	30	56.6	86.829	800	0.81738	1.0546	1.1869	1.5131	12182000000	3271300000	2489700000	2962700000	3458800000
Trifunctional enzyme subunit beta, mitochondrial;3-ketoacyl-CoA thiolase	HADHB	7	16	16	14	16	14	16	37.8	48.879	452	0.85401	1.0538	0.77975	0.98695	2732100000	847460000	708970000	651480000	524220000
60S ribosomal protein L27	RPL27	1	9	9	7	7	7	7	52.9	15.798	136	0.78586	1.0534	0.76673	0.91431	21962000000	3045400000	2648300000	8829500000	7439100000
Jerky protein homolog-like	JRKL	1	6	6	5	5	5	5	17.2	59.911	524	0.86722	1.0518	0.71095	0.84053	734110000	168410000	144850000	238960000	181890000
Tissue factor pathway inhibitor 2	TFPI2	1	8	8	8	6	8	6	38.3	26.934	235	0.8211	1.0515	0.8946	1.1152	1787900000	488890000	475450000	421150000	402430000
60S ribosomal protein L22	RPL22	1	3	3	3	3	3	3	39.1	14.787	128	0.84816	1.0503	0.88392	1.0932	3036900000	548620000	472170000	1057100000	959000000
Multiple myeloma tumor-associated protein 2	MMTAG2	4	8	8	7	7	7	7	30	29.411	263	0.80429	1.0496	0.7324	0.91139	4621500000	1359900000	1129200000	1215800000	916670000
ADP-ribosylation factor-like protein 6-interacting protein 4	ARL6IP4	10	6	6	6	4	6	4	20.6	38.395	360	0.81253	1.0482	0.75999	0.93796	1709400000	533740000	437130000	401700000	336820000
Cyclic AMP-responsive element-binding protein 3-like protein 2;Processed cyclic AMP-responsive element-binding protein 3-like protein 2	CREB3L2	4	10	8	8	9	6	7	24.6	50.842	460	0.78668	1.0474	0.5603	0.69333	3915500000	576020000	482350000	2250600000	606570000
Aryl hydrocarbon receptor nuclear translocator-like protein 1	ARNTL	18	17	17	16	13	16	13	39	68.69	625	0.81759	1.0467	0.74868	0.95294	9993400000	2396900000	2073400000	3018700000	2504300000
Circadian locomoter output cycles protein kaput	CLOCK	2	27	24	23	25	21	22	32.9	95.303	846	0.82826	1.0443	0.75448	0.9959	15202000000	3655100000	3812400000	4284000000	3450300000
Nuclear apoptosis-inducing factor 1	NAIF1	2	10	10	10	8	10	8	44	35.164	327	0.78753	1.0439	0.75651	0.92935	4335200000	1043800000	899400000	1385500000	1006500000
Protein SON	SON	10	4	4	3	3	3	3	2.2	228.18	2108	0.71655	1.0433	1.2629	1.6232	163420000	57105000	44318000	26859000	35135000
60S ribosomal protein L13a	RPL13A	3	5	5	3	4	3	4	24.6	23.577	203	0.80098	1.042	0.78642	0.97872	1763300000	654880000	559330000	310410000	238700000
G patch domain-containing protein 8	GPATCH8	2	11	11	6	8	6	8	9.3	155.19	1424	0.84672	1.0383	0.77551	0.98539	544600000	149680000	89819000	166830000	138270000
NHP2-like protein 1;NHP2-like protein 1, N-terminally processed	NHP2L1	2	8	8	7	8	7	8	53.9	14.173	128	0.83021	1.0382	0.87769	0.9706	9864600000	1501300000	1298600000	3726000000	3338700000
60S ribosomal protein L23a	RPL23A	3	17	17	15	17	15	17	55.1	17.695	156	0.87983	1.0371	0.91194	1.0388	59510000000	14519000000	13207000000	16397000000	15387000000
Max-binding protein MNT	MNT	1	5	5	4	4	4	4	10.8	62.299	582	0.769	1.033	0.49857	0.65337	634300000	168870000	160000000	193160000	112270000
DNA mismatch repair protein Msh2	MSH2	9	20	20	12	16	12	16	27.7	104.74	934	0.78799	1.0319	0.6637	0.84729	4664400000	421820000	3360300000	537700000	344550000
Transcription initiation factor TFIID subunit 10	TAF10	1	6	6	5	5	5	5	35.3	21.711	218	0.89152	1.0302	1.2518	1.3936	1268900000	355690000	291210000	268140000	353870000
60S ribosomal protein L15;Ribosomal protein L15	RPL15	5	6	6	4	4	4	4	26	24.146	204	0.85822	1.0296	0.8433	1.0099	520450000	193690000	165540000	87012000	74214000
E3 ubiquitin-protein ligase RING2	RNF2	2	7	6	5	6	4	5	29.8	37.655	336	0.84797	1.0284	0.66145	0.83664	367770000	66211000	53754000	146210000	101600000
60S ribosomal protein L36a	RPL36A;RPL36A-HNRNPH2	3	9	3	5	9	1	3	47.2	12.441	106	0.88401	1.0266	0.87089	1.037	15568000000	1007800000	978890000	6998900000	6582500000
Transcription initiation factor TFIID subunit 4	TAF4	2	36	35	32	33	31	32	46.7	110.11	1085	0.71057	1.0256	1.1749	1.5297	14624000000	4003600000	3080600000	3429000000	4110800000
Treacle protein	TCOF1	4	116	0	106	107	0	0	69.8	156.06	1525	0.74448	1.0248	0.74364	0.93699	356280000000	92065000000	72132000000	108100000000	83985000000
Serine/arginine-rich splicing factor 10	SRSF10	8	7	7	7	7	7	7	36.6	20.913	172	0.74215	1.0237	1.2373	1.5631	1440900000	413110000	332830000	300760000	394180000
Band 4.1-like protein 5	EPB41L5	4	4	4	4	4	4	4	11.9	57.885	505	0.83431	1.0223	0.70878	0.85419	276250000	54347000	47845000	101390000	72675000
Protein FAM133B	FAM133B	5	5	5	5	5	5	5	44.8	12.41	105	0.74514	1.0222	0.90081	0.9986	1385600000	421370000	311020000	359720000	293480000
40S ribosomal protein S18	RPS18	2	6	6	2	6	2	6	34.2	17.718	152	0.79719	1.0221	0.94292	1.1561	427740000	38453000	28220000	195370000	165700000
Bromodomain-containing protein 9	BRD9	8	4	4	3	3	3	3	12.9	66.999	597	0.74707	1.021	0.59985	0.73913	70120000	23075000	19334000	16659000	11051000
Nucleolar protein of 40 kDa	ZCCHC17	4	9	9	5	9	5	9	39.1	27.994	243	0.73043	1.0202	0.80188	1.0102	2924200000	1045100000	849770000	555090000	474200000
Nucleolar GTP-binding protein 2	GNL2	3	22	22	19	18	19	18	33.5	83.654	731	0.79016	1.0199	0.89668	1.1315	4493900000	1103100000	876680000	1331000000	1183200000
TATA-box-binding protein;TATA box-binding protein-like protein 2	TBP;TBPL2	6	6	6	6	6	6	6	24.7	34.751	316	0.8274	1.0191	1.0293	1.2644	3303300000	699970000	559960000	1017000000	1026400000
S-phase kinase-associated protein 1	SKP1	9	6	6	4	6	4	6	55.8	18.658	163	0.86305	1.0185	0.80088	0.92447	945900000	200000000	170030000	302060000	273810000
Apoptotic chromatin condensation inducer in the nucleus	ACIN1	7	23	23	17	20	17	20	23.5	147.36	1301	0.67806	1.0182	1.079	1.4104	1787900000	544390000	380850000	405940000	456710000
Protein FAM111A	FAM111A	3	19	19	16	15	16	15	38.6	70.195	611	0.79886	1.0175	0.67058	0.85506	2400800000	642960000	481980000	753920000	521900000
Nuclear respiratory factor 1	NRF1	5	11	11	8	9	8	9	30.6	53.54	503	0.8557	1.0163	0.71818	0.89936	8402400000	2175100000	1828700000	2531400000	1867300000
DNA topoisomerase 1	TOP1	10	92	86	85	89	79	84	68.6	90.725	765	0.80942	1.016	0.81027	1.0122	1319000000000	295530000000	253030000000	413770000000	356710000000
Barrier-to-autointegration factor;Barrier-to-autointegration factor, N-terminally processed	BANF1	2	4	4	3	3	3	3	42.7	10.058	89	0.83251	1.0158	0.86422	0.99357	1433400000	339350000	318110000	398020000	377940000
Coiled-coil domain-containing protein 86	CCDC86	4	7	7	6	6	6	6	25	40.235	360	0.68095	1.0141	0.58223	0.72516	1022200000	263860000	202040000	333700000	222610000
60S ribosomal protein L10	RPL10	4	13	2	12	12	2	2	49.1	24.604	214	0.77186	1.0097	0.7468	0.93286	3009800000	815350000	768180000	781330000	644930000
Atherin	SAMD1	3	19	19	19	13	19	13	50.4	56.051	538	0.75731	1.0061	0.67766	0.8851	16016000000	5171900000	3826600000	4199100000	2818600000
Cell growth-regulating nucleolar protein	LYAR	2	27	27	23	27	23	27	55.7	43.614	379	0.79905	1.0048	0.79359	0.9744	67673000000	19208000000	14780000000	18867000000	14818000000
Pre-mRNA-processing factor 6	PRPF6	2	21	21	17	19	17	19	24	106.92	941	0.72454	1.0044	0.98021	1.2759	2477100000	674020000	484120000	651650000	667350000
60S ribosomal protein L19	RPL19	1	13	13	11	13	11	13	43.9	23.466	196	0.79443	1.0035	0.81403	0.96497	12584000000	2530800000	2085500000	4211000000	3756300000
Lethal(3)malignant brain tumor-like protein 3	L3MBTL3	4	28	27	21	26	20	26	44.6	85.756	755	0.76916	1.0034	0.71694	0.86402	16120000000	4225900000	3288700000	5002100000	3603100000
X-ray repair cross-complementing protein 5	XRCC5	2	54	54	46	53	46	53	78.3	82.704	732	0.78824	1.0025	0.68426	0.85548	146790000000	37053000000	32182000000	44423000000	33136000000
Aspartyl/asparaginyl beta-hydroxylase	ASPH	4	6	6	6	3	6	3	8.2	83.267	729	0.74302	1.0022	0.93389	1.1737	257160000	111400000	76480000	35208000	34074000
60S ribosomal protein L10a	RPL10A	1	9	9	8	8	8	8	39.2	24.831	217	0.84958	1.0019	0.81183	0.94223	489290000	156190000	147060000	102660000	83378000
Nucleolar MIF4G domain-containing protein 1	NOM1	1	14	14	8	13	8	13	18.8	96.256	860	0.69715	1.0016	0.74865	0.89892	583020000	143070000	106170000	182210000	151560000
X-ray repair cross-complementing protein 6	XRCC6	5	49	49	45	48	45	48	69.5	69.842	609	0.81893	1.0012	0.68701	0.84348	178310000000	46250000000	38579000000	54516000000	38963000000
Acidic fibroblast growth factor intracellular-binding protein	FIBP	5	8	8	7	7	7	7	29.7	41.21	357	0.78552	0.99897	0.71933	0.92379	821020000	199600000	295550000	193260000	132620000
60S ribosomal protein L13	RPL13	2	9	9	7	8	7	8	40.8	24.261	211	0.8213	0.99872	0.80013	0.99941	8459200000	2569900000	2177300000	2120700000	1591300000
Surfeit locus protein 6	SURF6	1	11	11	10	11	10	11	33.8	41.45	361	0.77523	0.99851	0.77424	1.0105	4503600000	1167100000	918520000	1312400000	1105600000
Histone H1.1	HIST1H1A	1	17	9	14	17	8	9	48.8	21.842	215	0.79887	0.99848	0.79698	0.96586	9769000000	2938700000	2228600000	2566300000	2035500000
DNA-directed RNA polymerase I subunit RPA2;DNA-directed RNA polymerase	POLR1B	12	34	34	27	31	27	31	36.1	128.23	1135	0.67579	0.99643	0.81163	1.0731	4172000000	1250900000	835340000	1113800000	971900000
Endonuclease III-like protein 1	NTHL1	1	4	4	3	3	3	3	23.7	34.389	312	0.82967	0.99625	0.62569	0.7663	538760000	165640000	107770000	172910000	92449000
Signal recognition particle subunit SRP68	SRP68	8	6	6	3	6	3	6	16.7	60.284	526	0.73877	0.99526	0.89681	1.1395	163740000	43614000	34587000	43265000	42272000
60S ribosomal protein L18a	RPL18A	2	4	4	4	2	4	2	29.2	18.11	154	0.82103	0.99463	0.9134	1.0247	230810000	75299000	63725000	49617000	42164000
28S ribosomal protein S5, mitochondrial	MRPS5	2	8	8	7	8	7	8	20.5	48.006	430	0.76597	0.99385	0.86164	1.0902	504580000	140690000	116740000	134060000	113080000
Transcription initiation factor TFIID subunit 11	TAF11	2	7	7	6	6	6	6	64	23.307	211	0.77585	0.99301	1.2636	1.5729	895340000	187050000	150530000	244170000	313590000
60S ribosomal protein L23	RPL23	3	7	7	5	6	5	6	50	14.865	140	0.82243	0.99149	0.76278	0.92398	2382400000	454040000	473220000	470730000	984440000
Interferon-inducible protein AIM2	AIM2	3	15	15	13	14	13	14	45.8	38.953	343	0.82101	0.98965	0.992	1.2179	2501000000	615890000	558910000	653800000	672390000
Transcription initiation factor TFIID subunit 7	TAF7	1	17	17	12	14	12	14	51.3	40.259	349	0.75935	0.98752	1.1551	1.5012	2804600000	649900000	518650000	722480000	913590000
TATA box-binding protein-associated factor RNA polymerase I subunit C	TAF1C	8	24	24	19	21	19	21	38.4	85.041	776	0.7809	0.98702	0.72099	0.88679	5113500000	1382700000	1108300000	1490300000	1132200000
Lysine-rich nucleolar protein 1	KNOP1	1	38	38	36	36	36	36	64.8	51.588	458	0.76302	0.98687	0.75396	0.96226	37470000000	9769300000	7697300000	11314000000	8689000000
116 kDa U5 small nuclear ribonucleoprotein component	EFTUD2	2	33	33	28	30	28	30	47.5	105.38	937	0.7129	0.98659	0.94622	1.2339	5718800000	1545100000	1131500000	1570200000	1472000000
DNA-directed RNA polymerase I subunit RPA1;DNA-directed RNA polymerase	POLR1A	2	64	63	58	51	57	51	52.6	194.81	1720	0.66607	0.98612	0.82907	1.1029	10097000000	3356900000	2204700000	2467500000	2068000000
NK-tumor recognition protein;Putative peptidyl-prolyl cis-trans isomerase	NKTR	1	11	11	7	8	7	8	10.7	165.67	1462	0.68756	0.98498	0.89092	1.1331	350280000	76713000	53308000	118540000	101720000
Nucleolar protein 56	NOP56	5	43	43	41	40	41	40	81	66.049	594	0.77676	0.98092	0.82153	1.0485	113490000000	29940000000	24240000000	32208000000	27107000000
Leydig cell tumor 10 kDa protein homolog	C19orf53	1	4	4	3	4	3	4	17.2	10.576	99	0.78508	0.97962	0.76718	0.88221	597540000	94815000	76266000	250800000	175650000
RNA-binding protein Raly	RALY	7	4	4	3	2	3	2	17.3	24.665	237	0.81257	0.97837	1.4525	1.6383	131250000	40709000	31677000	19475000	39393000
CLOCK-interacting pacemaker	CIPC	1	11	11	9	9	9	9	37.6	42.692	399	0.80072	0.97759	0.82666	0.96852	1374600000	339990000	325460000	406370000	302760000
Signal recognition particle 14 kDa protein	SRP14	2	9	8	8	9	7	8	47.1	14.57	136	0.72329	0.97637	0.85411	0.97097	53999000000	10022000000	7857500000	19462000000	16657000000
Protein ELYS	AHCTF1	2	36	36	29	33	29	33	22.2	252.5	2266	0.6601	0.97561	1.1477	1.483	2555200000	574660000	379140000	768760000	832590000
Cyclic AMP-responsive element-binding protein 1	CREB1	10	5	4	5	5	4	4	23.8	36.688	341	0.77762	0.97379	0.55689	0.69684	2476900000	566480000	477830000	903260000	529360000
Zinc finger protein ZIC 1;Zinc finger protein ZIC 3;Zinc finger protein ZIC 5	ZIC1;ZIC3;ZIC5	24	4	3	4	2	3	1	12.5	48.308	447	0.72242	0.97352	0.85642	1.0139	360170000	107380000	107310000	77441000	68038000
G patch domain-containing protein 4	GPATCH4	7	27	27	23	26	23	26	53.1	50.381	446	0.76129	0.97306	0.69155	0.88144	11856000000	2705400000	2081800000	4097700000	2971500000
Zinc finger MYND domain-containing protein 11	ZMYND11	12	17	17	13	13	13	13	38.1	61.286	522	0.74572	0.9724	0.77649	0.98315	1261400000	358990000	268870000	331790000	301720000
Periodic tryptophan protein 1 homolog	PWP1	6	10	10	5	9	5	9	27.5	55.827	501	0.74775	0.97129	0.83406	1.1096	1574000000	205800000	181920000	581790000	604510000
Probable ATP-dependent RNA helicase DHX37	DHX37	2	20	20	14	17	14	17	20.5	129.54	1157	0.65118	0.96812	0.85346	1.1316	785650000	205410000	129590000	249170000	201480000
Phosphatidylinositol 5-phosphate 4-kinase type-2 gamma	PIP4K2C	7	7	7	4	5	4	5	19.9	45.053	403	0.73843	0.96811	0.70081	0.81772	499140000	147470000	103400000	138420000	109850000
Peptidyl-prolyl cis-trans isomerase;Peptidyl-prolyl cis-trans isomerase G	PPIG	8	9	9	9	9	9	9	49.6	27.409	246	0.76642	0.96801	0.87169	1.1135	2876700000	823010000	631020000	780710000	641940000
rRNA/tRNA 2-O-methyltransferase fibrillarin-like protein 1	FBLL1	1	6	2	5	6	2	2	18	34.675	333	0.72015	0.96797	0.75373	0.93673	9296300000	2624900000	1980100000	2556100000	2135200000
Nucleolar complex protein 2 homolog	NOC2L	1	5	5	4	5	4	5	6.9	84.918	749	0.70911	0.96756	0.90406	1.1208	142730000	46609000	31804000	33934000	30379000
Probable ATP-dependent RNA helicase DDX23	DDX23	4	22	22	19	21	19	21	31.1	95.581	820	0.74296	0.96734	1.0635	1.3313	3194400000	884320000	682800000	784260000	843040000
Poly(U)-binding-splicing factor PUF60	PUF60	12	19	19	16	18	16	18	52.4	55.399	513	0.76967	0.96704	0.86897	1.0538	3727700000	955740000	644230000	1134400000	993290000
Protein BANP	BANP	11	16	0	12	15	0	0	35.6	55.502	508	0.75405	0.96611	0.49779	0.65378	7930500000	1894400000	1471700000	2959100000	1605200000
Histone H1.5	HIST1H1B	1	19	13	15	17	11	12	42.5	22.58	226	0.78379	0.9657	0.77806	0.97533	46631000000	16687000000	13884000000	9022800000	7036700000
La-related protein 7	LARP7	7	17	17	16	15	16	15	32.5	66.898	582	0.74155	0.96229	0.85152	1.0265	2753200000	673010000	529650000	845640000	704900000
Retinitis pigmentosa 9 protein	RP9	2	8	8	7	8	7	8	39.4	26.106	221	0.75272	0.96226	0.79328	0.95824	1680500000	436510000	329550000	516520000	397960000
Nuclear cap-binding protein subunit 1	NCBP1	1	20	20	14	17	14	17	34.3	91.838	790	0.72096	0.96198	1.0967	1.3605	1624500000	358230000	290870000	509810000	465620000
Syntenin-1	SDCBP	4	7	1	7	7	1	1	37.7	31.761	292	0.73411	0.96081	0.67928	0.84417	331610000	96964000	71822000	89378000	73450000
78 kDa glucose-regulated protein	HSPA5	2	30	29	26	28	25	27	49.1	72.332	654	0.77799	0.96026	0.7615	0.9523	11914000000	3029900000	2354800000	3582000000	2946800000
Small nuclear ribonucleoprotein Sm D1	SNRPD1	1	3	3	2	3	2	3	20.2	13.281	119	0.73598	0.95932	1.0144	1.2349	442010000	71113000	39385000	153720000	177790000
60S ribosomal protein L11	RPL11	4	4	4	3	3	3	3	21.5	20.124	177	0.82937	0.95794	0.79276	0.91797	324500000	95594000	75134000	79161000	74607000
40S ribosomal protein S9	RPS9	5	12	12	8	9	8	9	42.8	22.591	194	0.75514	0.95699	0.86882	1.0708	2942000000	625160000	493220000	965880000	857760000
Shugoshin-like 2	SGOL2	3	5	5	3	5	3	5	5.9	144.18	1261	0.62688	0.95633	0.88649	1.183	116900000	19771000	16103000	43764000	37260000
Nucleolar protein 7	NOL7	2	6	6	3	5	3	5	18.7	29.426	257	0.78989	0.955	0.70486	0.81012	627630000	154690000	120750000	201880000	150300000
Splicing factor 3B subunit 1	SF3B1	1	17	17	13	12	13	12	16.3	145.83	1304	0.64484	0.95346	1.0782	1.418	561560000	198080000	124850000	114220000	124400000
U3 small nucleolar ribonucleoprotein protein IMP3	IMP3	2	6	6	4	6	4	6	45.7	21.85	184	0.73191	0.95108	0.77792	0.97091	1157200000	256360000	159630000	416870000	324370000
Death domain-associated protein 6	DAXX	3	3	3	3	3	3	3	6.2	78.332	710	0.79463	0.95066	0.76181	0.97944	531870000	129930000	109090000	156230000	136620000
Collagen alpha-3(VI) chain	COL6A3	10	49	49	43	41	43	41	21.6	322.18	2976	0.63284	0.9501	0.71857	0.92624	15800000000	924760000	7721600000	737520000	6415700000
Bcl-2-associated transcription factor 1	BCLAF1	12	17	17	12	16	12	16	23.1	100.4	871	0.67123	0.95007	1.0699	1.4313	1977800000	620850000	468580000	430890000	457470000
Ribosomal RNA processing protein 1 homolog B	RRP1B	3	47	47	40	46	40	46	66.1	82.175	740	0.76557	0.94988	0.70713	0.90181	142320000000	36319000000	29088000000	44565000000	32351000000
rRNA-processing protein FCF1 homolog	FCF1	4	6	6	6	3	6	3	31.1	21.491	183	0.72786	0.94698	0.61924	0.7774	345270000	117430000	79500000	93862000	54487000
Phosphatidylinositol 5-phosphate 4-kinase type-2 beta	PIP4K2B	4	9	6	8	8	5	5	26.2	47.377	416	0.74102	0.94648	0.783	0.92637	895620000	240670000	202370000	241230000	211350000
Importin subunit alpha-5;Importin subunit alpha-5, N-terminally processed;Importin subunit alpha-6	KPNA1;KPNA5	13	7	7	6	6	6	6	16.2	60.221	538	0.77696	0.94562	0.76149	0.90178	795040000	116360000	149830000	186200000	342640000
Centrin-3	CETN3	6	5	5	3	4	3	4	44.2	18.336	156	0.8488	0.94534	0.73688	0.84854	2556400000	597820000	568030000	704380000	686150000
60S ribosomal protein L29	RPL29	1	2	2	2	2	2	2	14.5	17.752	159	0.85142	0.94334	0.84951	0.95374	1554600000	642810000	515060000	206900000	189800000
ATPase family AAA domain-containing protein 5	ATAD5	2	29	29	21	24	21	24	20.7	207.57	1844	0.64196	0.94147	0.81927	1.0425	1039100000	293010000	213380000	287310000	245360000
Neuronal PAS domain-containing protein 2	NPAS2	2	10	7	6	9	4	6	12	91.79	824	0.71255	0.94131	0.81548	1.0429	1044500000	272800000	232890000	300340000	238500000
Poly [ADP-ribose] polymerase 1	PARP1	4	70	70	66	67	66	67	63.8	113.08	1014	0.67447	0.94091	0.9691	1.2495	184710000000	51533000000	36027000000	48086000000	49062000000
Uncharacterized protein C12orf43	C12orf43	9	18	18	16	18	16	18	71	28.17	262	0.77719	0.94051	0.66862	0.80442	30814000000	10287000000	8270800000	7186400000	5070200000
Transcription initiation factor TFIID subunit 9B	TAF9B	1	9	4	9	7	4	3	40.6	27.622	251	0.72099	0.93968	1.1712	1.3726	407410000	104940000	87112000	98178000	117180000
DNA-3-methyladenine glycosylase	MPG	5	9	9	8	9	8	9	39.1	30.824	281	0.73277	0.93919	0.62913	0.78872	2906100000	689270000	500120000	1013000000	703700000
60S acidic ribosomal protein P0;60S acidic ribosomal protein P0-like	RPLP0;RPLP0P6	14	6	6	5	5	5	5	26.5	34.273	317	0.7961	0.93913	0.75934	0.85439	350650000	120210000	95969000	80156000	54315000
60S ribosomal protein L26-like 1	RPL26L1	3	11	2	10	9	2	2	46.9	17.256	145	0.68071	0.93902	0.7255	0.8254	576160000	75093000	61129000	255000000	184930000
Sp110 nuclear body protein	SP110	12	15	15	14	13	14	13	35.6	61.739	547	0.69958	0.93863	0.90812	1.1683	1751200000	413890000	307470000	539230000	490570000
Vimentin	VIM	19	32	29	23	28	21	26	73.2	53.651	466	0.70196	0.93842	1.1946	1.5407	7353800000	1675000000	1278000000	1927700000	2473100000
Rab11 family-interacting protein 2	RAB11FIP2	6	6	6	3	6	3	6	19.1	58.278	512	0.70379	0.93779	0.62904	0.75026	166340000	44945000	31144000	56673000	33580000
pre-rRNA processing protein FTSJ3	FTSJ3	1	27	27	25	24	25	24	40.4	96.557	847	0.6783	0.93717	0.51591	0.68219	9844200000	2862000000	1741000000	3510000000	1731200000
Thyroid hormone receptor-associated protein 3	THRAP3	1	21	21	17	21	17	21	22.1	108.66	955	0.6439	0.93672	1.0958	1.4568	4821800000	1310400000	860140000	1396400000	1254800000
Interleukin enhancer-binding factor 3	ILF3	9	5	5	4	2	4	2	9.2	82.741	764	0.69608	0.93644	1.2026	1.5145	198600000	82773000	51199000	28862000	35765000
Bifunctional lysine-specific demethylase and histidyl-hydroxylase MINA	MINA	6	5	5	3	5	3	5	14.2	52.8	465	0.71238	0.93563	0.56864	0.70304	212580000	49937000	36894000	77510000	48238000
Probable ATP-dependent RNA helicase DDX27	DDX27	2	31	31	27	30	27	30	44.7	89.834	796	0.76557	0.93413	0.6979	0.87105	12361000000	3340300000	2576100000	3808800000	2636000000
Lethal(3)malignant brain tumor-like protein 2	L3MBTL2	7	12	12	9	9	9	9	20.6	79.109	705	0.734	0.9338	0.62384	0.77149	1489300000	443400000	327700000	415150000	303100000
RNA-binding motif protein, X-linked 2	RBMX2	3	9	9	7	8	7	8	33.5	31.576	275	0.73671	0.93379	0.74704	0.98091	2087700000	542860000	380970000	645630000	518240000
DnaJ homolog subfamily B member 6	DNAJB6	18	3	3	2	3	2	3	13.4	29.487	268	0.73166	0.9337	0.58929	0.76436	329420000	57717000	56912000	157930000	56862000
U4/U6 small nuclear ribonucleoprotein Prp4	PRPF4	2	11	11	11	10	11	10	24.8	58.32	521	0.74503	0.93267	0.8371	0.97991	2345300000	712080000	547480000	573560000	512190000
Thyroid transcription factor 1-associated protein 26	CCDC59	2	9	9	7	8	7	8	34	28.669	241	0.72765	0.932	0.69316	0.86539	1022500000	272370000	214780000	295320000	240040000
Pescadillo homolog	PES1	5	8	8	7	5	7	5	18.7	66.077	571	0.70066	0.93097	0.74605	0.94385	290380000	75216000	55311000	88690000	71168000
Signal recognition particle 9 kDa protein	SRP9	3	5	5	5	5	5	5	53.5	10.112	86	0.74034	0.93096	0.81764	0.93347	17208000000	2905900000	2148800000	6644100000	5509200000
CXXC-type zinc finger protein 5	CXXC5	12	7	7	7	4	7	4	39.8	32.977	322	0.74399	0.93037	0.57147	0.7159	3914300000	2518400000	691340000	410040000	294580000
SRSF protein kinase 1	SRPK1	15	8	8	7	7	7	7	17.7	62.032	547	0.68623	0.92962	1.0235	1.1902	679420000	214810000	182640000	155470000	126500000
Corepressor interacting with RBPJ 1	CIR1	3	11	11	11	11	11	11	31.6	52.313	450	0.70112	0.92873	0.71441	0.9314	4484400000	1103000000	724850000	1620200000	1036400000
Transcription factor Dp-1	TFDP1	5	4	4	4	4	4	4	23.7	26.175	236	0.76987	0.92824	0.65129	0.7824	470000000	120610000	86104000	162720000	100560000
Cyclin-dependent-like kinase 5	CDK5	47	6	6	4	3	4	3	22.3	33.304	292	0.73609	0.92757	0.63873	0.79729	163200000	66794000	55890000	23284000	17228000
Transcription initiation factor TFIID subunit 12	TAF12	2	3	3	3	2	3	2	22.1	14.825	131	0.7439	0.92655	1.1057	1.3527	829960000	193410000	151680000	222330000	262550000
Serine/arginine-rich splicing factor 4	SRSF4	3	13	9	13	12	9	8	22.3	56.678	494	0.70326	0.92608	0.87292	1.1061	7488900000	1330400000	905700000	2813900000	2438900000
DNA-dependent protein kinase catalytic subunit	PRKDC	5	182	182	166	170	166	170	47.3	469.08	4128	0.63686	0.92488	0.74115	0.97908	130550000000	40435000000	26571000000	35753000000	27786000000
Uncharacterized protein C14orf93	C14orf93	6	7	7	7	3	7	3	22.9	54.164	498	0.68773	0.92266	0.5309	0.68946	339030000	112020000	68415000	91793000	66799000
WD repeat-containing protein 5	WDR5	1	11	11	10	10	10	10	43.1	36.588	334	0.71445	0.9207	0.71963	0.86891	1958700000	620550000	495340000	484650000	358140000
Putative pre-mRNA-splicing factor ATP-dependent RNA helicase DHX15	DHX15	2	13	12	10	10	10	9	20.4	89.502	784	0.71303	0.92008	1.0181	1.2054	999570000	268080000	211110000	241980000	278390000
Set1/Ash2 histone methyltransferase complex subunit ASH2	ASH2L	8	6	6	4	6	4	6	15.4	60.207	534	0.7488	0.91952	0.78858	0.96541	265610000	53091000	42690000	99104000	70729000
Transcription initiation factor TFIID subunit 8	TAF8	6	13	13	11	11	11	11	61.6	34.262	310	0.73661	0.91947	1.1892	1.5406	2920300000	930170000	672120000	477810000	840230000
Treacle protein	TCOF1	6	109	0	100	100	0	0	68.8	152.3	1488	0.66558	0.91821	0.64403	0.84009	1709800000	504240000	355620000	493990000	355970000
YTH domain-containing protein 1	YTHDC1	2	8	8	5	7	5	7	11	82.691	709	0.63414	0.91696	1.0399	1.2916	330950000	64694000	45323000	101290000	119650000
Serine/arginine-rich splicing factor 7	SRSF7	7	7	6	7	7	6	6	41.2	18.841	165	0.65303	0.91628	0.79663	1.0536	3856700000	1185400000	867330000	944430000	859630000
Nucleolar protein 16	NOP16	6	7	7	6	6	6	6	42.7	21.188	178	0.73122	0.91565	0.71341	0.88334	769970000	214410000	149400000	234430000	171720000
Ubiquitin-40S ribosomal protein S27a;Ubiquitin;40S ribosomal protein S27a;Polyubiquitin-B;Ubiquitin;Polyubiquitin-C;Ubiquitin	RPS27A;UBC;UBB	18	5	1	3	5	0	1	34	17.965	156	0.67633	0.91434	0.86822	1.1009	6864300000	1894800000	1443000000	1936500000	1590100000
Heat shock cognate 71 kDa protein	HSPA8	19	24	21	21	22	18	19	43.8	70.897	646	0.70632	0.91018	0.77873	0.96096	11882000000	3261500000	2387200000	3475400000	2758100000
rRNA 2-O-methyltransferase fibrillarin	FBL	1	23	19	20	20	17	16	63.6	33.784	321	0.71442	0.90938	0.80838	0.97137	59986000000	16453000000	13391000000	16309000000	13833000000
40S ribosomal protein S15	RPS15	1	1	1	1	1	1	1	9	17.04	145	0.64121	0.9083	0.73585	0.92122	129930000	22510000	14829000	52564000	40025000
PAX3- and PAX7-binding protein 1	PAXBP1	4	14	14	12	9	12	9	21.7	104.8	917	0.65037	0.90739	0.85045	1.0889	1035500000	127390000	81327000	442350000	384440000
CCAAT/enhancer-binding protein zeta	CEBPZ	3	11	11	8	9	8	9	14.6	114.16	998	0.5962	0.90731	1.026	1.389	503070000	244460000	76964000	89858000	91791000
Probable global transcription activator SNF2L1	SMARCA1	4	20	9	17	15	7	8	17.2	117.26	1005	0.60937	0.90704	0.6768	0.89298	206240000	66788000	39498000	57458000	42494000
Serine/arginine repetitive matrix protein 2	SRRM2	5	52	52	43	48	43	48	26.7	299.61	2752	0.62577	0.90671	0.88501	1.1768	14075000000	3686600000	2337600000	4213500000	3837400000
40S ribosomal protein S11	RPS11	1	10	10	9	6	9	6	51.9	18.431	158	0.7567	0.90552	0.86039	1.0744	1560900000	414690000	339470000	412130000	394620000
DNA-directed RNA polymerase I subunit RPA43	TWISTNB	1	5	5	4	5	4	5	17.5	37.432	338	0.753	0.90537	0.80422	0.98013	441420000	80087000	60217000	154260000	146850000
rRNA-processing protein UTP23 homolog	UTP23	6	8	8	6	7	6	7	47.8	28.402	249	0.72674	0.90532	0.75255	0.92255	921040000	312450000	249830000	203270000	155490000
Nucleolar protein 12	NOL12	1	9	9	7	7	7	7	43.2	24.663	213	0.69314	0.9053	0.69924	0.83593	814760000	268920000	193470000	211950000	140420000
p21-activated protein kinase-interacting protein 1	PAK1IP1	1	3	3	3	3	3	3	9.7	43.963	392	0.75138	0.90475	0.81167	0.97279	378460000	120280000	96788000	89050000	72335000
40S ribosomal protein S4, X isoform	RPS4X	6	13	13	11	9	11	9	47.1	29.597	263	0.71444	0.90323	0.91105	1.0882	3356500000	1278900000	1009100000	545680000	522850000
Max-like protein X	MLX	3	4	4	1	4	1	4	24.2	27.883	244	0.69137	0.89963	0.82179	0.93282	173010000	40792000	27799000	55842000	48581000
60S ribosomal protein L8	RPL8	7	11	11	10	6	10	6	45.1	28.024	257	0.69553	0.89778	0.64973	0.80759	5312400000	2293000000	1664000000	754860000	600520000
Eukaryotic translation initiation factor 6	EIF6	5	8	8	8	6	8	6	56.7	26.599	245	0.73744	0.89638	0.7364	0.91833	1474400000	480040000	336460000	384170000	273730000
Serine/arginine repetitive matrix protein 1	SRRM1	5	26	26	24	23	24	23	25	103.39	913	0.66963	0.89609	0.78378	0.99749	48093000000	13723000000	9375800000	14407000000	10587000000
DNA-directed RNA polymerase I subunit RPA49	POLR1E	4	23	23	22	22	22	22	69.2	47.26	419	0.72851	0.89457	0.85226	1.0016	33821000000	7127100000	5217600000	8380000000	13096000000
Putative RNA-binding protein Luc7-like 2;UPF0562 protein C7orf55	LUC7L2;C7orf55	8	11	6	9	10	5	6	29.8	46.513	392	0.71067	0.89449	0.79363	0.98321	2039200000	512200000	356110000	640640000	530290000
Small nuclear ribonucleoprotein Sm D2	SNRPD2	1	5	5	2	5	2	5	44.9	13.527	118	0.68996	0.89393	1.121	1.3058	345600000	55764000	35838000	124380000	129630000
DNA repair protein complementing XP-C cells	XPC	6	51	51	47	46	47	46	54.3	105.95	940	0.62946	0.89374	0.81513	1.0858	75828000000	22017000000	14212000000	21622000000	17977000000
DNA topoisomerase 2-beta;DNA topoisomerase 2	TOP2B	4	85	70	79	80	65	66	49.2	182.66	1621	0.60003	0.89026	0.78443	1.0417	65881000000	20002000000	12714000000	18656000000	14509000000
Histone H2A.V;Histone H2A.Z;Histone H2A	H2AFV;H2AFZ	7	4	2	4	4	2	2	31.2	13.509	128	0.73421	0.88939	0.6991	0.7829	745440000	132090000	102290000	292270000	218800000
Transcription initiation factor TFIID subunit 6	TAF6	12	34	34	28	31	28	31	63.1	72.668	677	0.7215	0.88817	1.1465	1.4371	15308000000	3841800000	2935400000	4119800000	4411100000
Eukaryotic translation initiation factor 5B	EIF5B	1	17	17	12	11	12	11	20.2	138.83	1220	0.67256	0.88612	0.8505	1.0572	1511600000	438150000	274710000	417940000	380800000
40S ribosomal protein S3a	RPS3A	13	11	11	11	9	11	9	52	25.608	223	0.74639	0.88413	0.89201	1.0958	3524900000	1066400000	737230000	892820000	828460000
Histone H2B type F-S	H2BFS	1	9	1	8	9	1	1	58.7	13.944	126	0.6981	0.88215	0.71485	0.86274	16325000000	5721700000	4218400000	3608600000	2776700000
60S acidic ribosomal protein P2	RPLP2	2	3	3	3	3	3	3	53	11.665	115	0.72096	0.88178	0.70429	0.80077	250460000	59745000	52592000	78169000	59951000
RNA-binding protein 25	RBM25	5	9	9	3	6	3	6	13.3	100.18	843	0.62795	0.8817	1.0283	1.3467	195900000	28382000	22841000	72456000	72225000
Transcription initiation factor TFIID subunit 9	TAF9;AK6	6	11	6	10	10	5	6	50	28.974	264	0.73295	0.88091	1.11	1.3536	4620000000	1461200000	1139400000	1001200000	1018300000
Crooked neck-like protein 1	CRNKL1	4	5	5	4	5	4	5	6.5	99.172	836	0.68779	0.87509	1.0676	1.3114	312430000	68970000	56522000	88424000	98519000
Polycomb group RING finger protein 1	PCGF1	2	8	8	6	8	6	8	41.3	30.346	259	0.69586	0.87487	0.77903	0.88169	1713900000	485240000	345140000	539550000	343950000
Reticulocalbin-2	RCN2	4	5	5	4	4	4	4	22.1	36.876	317	0.66735	0.87402	0.8372	0.98304	404330000	155000000	83377000	90781000	75175000
ATP-dependent RNA helicase DDX18	DDX18	2	38	38	38	31	38	31	57.8	75.406	670	0.67076	0.87255	0.8263	1.0103	62246000000	19072000000	13561000000	15778000000	13835000000
Tuftelin-interacting protein 11	TFIP11	9	8	8	4	8	4	8	13	96.819	837	0.66863	0.87191	0.99471	1.2177	556340000	109870000	74844000	187320000	184290000
U3 small nucleolar ribonucleoprotein protein MPP10	MPHOSPH10	2	13	13	11	11	11	11	27.2	78.863	681	0.63514	0.87087	0.64189	0.79482	2320500000	568190000	363850000	849660000	538840000
40S ribosomal protein S13	RPS13	2	5	5	5	5	5	5	31.1	17.222	151	0.65201	0.87086	0.69838	0.83326	4999600000	1608300000	1019300000	1375600000	996470000
Transmembrane protein 43	TMEM43	1	4	4	2	3	2	3	11	44.875	400	0.68222	0.86995	0.63944	0.81043	55454000	15357000	13663000	16612000	9823200
Transcription elongation factor, mitochondrial	TEFM	3	4	4	4	4	4	4	13.3	41.676	360	0.69682	0.86913	1.1493	1.3424	163620000	52805000	37046000	33250000	40521000
RRP12-like protein	RRP12	4	37	37	33	31	33	31	37.6	143.7	1297	0.58785	0.86822	0.69465	0.89785	3993700000	1125600000	721650000	1265400000	881040000
TBC1 domain family member 10B	TBC1D10B	2	15	15	11	10	11	10	28.5	87.198	808	0.63786	0.86712	0.73565	0.93184	1090500000	315860000	166270000	362850000	245520000
Serine/arginine-rich splicing factor 5	SRSF5	6	7	6	6	7	5	6	22.8	31.263	272	0.68889	0.86255	0.77241	0.94851	2478200000	725870000	505480000	684640000	562200000
Small nuclear ribonucleoprotein-associated proteins B and B;Small nuclear ribonucleoprotein-associated protein N	SNRPB;SNRPN	8	6	6	3	5	3	5	22.6	29.975	288	0.68015	0.86124	0.92893	1.1112	625240000	300260000	216680000	56556000	51745000
Ribosomal RNA processing protein 1 homolog A	RRP1	3	22	22	16	21	16	21	42.3	52.839	461	0.68825	0.85947	0.65442	0.86405	3233000000	767510000	536270000	1116400000	812810000
U3 small nucleolar ribonucleoprotein protein IMP4	IMP4	6	10	10	5	10	5	10	40.7	31.835	280	0.6664	0.85767	0.74616	0.93014	1289900000	316560000	204130000	439600000	329630000
Serine/threonine-protein phosphatase PGAM5, mitochondrial	PGAM5	3	9	9	7	7	7	7	28	32.004	289	0.72579	0.85667	0.88008	1.0988	1073000000	346100000	245730000	245310000	235830000
39S ribosomal protein L22, mitochondrial	MRPL22	4	3	3	3	2	3	2	14.6	24.325	212	0.65601	0.85577	0.73074	0.9036	101120000	38292000	23596000	21799000	17432000
Luc7-like protein 3	LUC7L3	9	10	10	9	9	9	9	26.4	51.466	432	0.70753	0.85537	0.98673	1.2131	2127600000	626180000	617590000	370400000	513420000
Guanine nucleotide-binding protein-like 3	GNL3	5	28	28	22	28	22	28	47.5	60.54	537	0.68604	0.8547	0.64947	0.79996	33633000000	9991700000	6814100000	10196000000	6631300000
Serine/arginine-rich splicing factor 1	SRSF1	3	13	12	13	12	12	11	47.2	27.744	248	0.67603	0.85375	0.97072	1.2404	5935000000	1711400000	1109700000	1582800000	1531100000
Stress-70 protein, mitochondrial	HSPA9	7	30	30	27	30	27	30	49.9	72.4	665	0.67588	0.85133	0.75818	0.96009	13606000000	3678600000	2511800000	4187000000	3228900000
Lysine-specific demethylase PHF2	PHF2	3	19	18	16	14	15	13	22.1	120.77	1096	0.57093	0.85063	0.72066	0.96639	2018600000	634680000	366400000	570390000	447080000
Protein LLP homolog	LLPH	1	6	6	4	6	4	6	45	15.225	129	0.70483	0.85042	0.71842	0.85158	839790000	147830000	105540000	330480000	255930000
DNA topoisomerase 2-alpha	TOP2A	7	99	84	90	89	76	75	59.6	174.38	1531	0.58913	0.84864	0.6968	0.90398	223430000000	66938000000	41975000000	65680000000	48840000000
60S ribosomal protein L31	RPL31	7	7	7	5	7	5	7	45.6	14.463	125	0.71241	0.84767	0.83465	0.9719	9195500000	1640700000	1197500000	3431500000	2925800000
ADP/ATP translocase 2;ADP/ATP translocase 2, N-terminally processed;ADP/ATP translocase 1	SLC25A5;SLC25A4	2	3	1	3	2	1	0	11.7	32.852	298	0.70932	0.84242	0.84472	0.95071	212610000	101360000	57573000	26776000	26905000
5-3 exoribonuclease 2	XRN2	3	10	10	8	7	8	7	13.3	102.42	896	0.67198	0.84208	0.68733	0.91294	298520000	102760000	54975000	87926000	52853000
60S ribosomal protein L14	RPL14	3	4	4	3	2	3	2	36.3	14.558	124	0.68249	0.84077	0.91868	1.146	621710000	227240000	155090000	134570000	104810000
Phosphatidylinositol 5-phosphate 4-kinase type-2 alpha	PIP4K2A	4	8	5	7	7	4	4	22.7	46.224	406	0.68562	0.83902	0.79196	0.98376	511880000	133840000	98432000	157950000	121650000
ELAV-like protein 1	ELAVL1	11	6	6	4	4	4	4	23	36.091	326	0.70489	0.83749	1.3102	1.4748	153760000	33322000	24566000	43831000	52037000
Histone deacetylase 1	HDAC1	3	9	5	5	8	2	4	23.4	55.102	482	0.64992	0.83531	0.72194	0.90543	313260000	36359000	20045000	147720000	109140000
Interferon-stimulated 20 kDa exonuclease-like 2	ISG20L2	1	7	7	3	7	3	7	20.1	39.153	353	0.69739	0.83286	0.89099	1.1201	249270000	30137000	23727000	109540000	85865000
RNA polymerase I-specific transcription initiation factor RRN3	RRN3	8	13	13	9	10	9	10	21.3	70.466	621	0.63189	0.83239	0.82345	1.0704	2665500000	362430000	1590900000	405990000	306210000
Protein SDA1 homolog	SDAD1	6	27	27	19	25	19	25	40.2	79.87	687	0.67667	0.83219	0.62895	0.78588	6592900000	1721100000	1246400000	2198700000	1426800000
60S ribosomal protein L6	RPL6	6	14	14	10	14	10	14	54	25.892	226	0.65055	0.83152	0.68442	0.84415	20383000000	5050300000	3280400000	7231600000	4820500000
U1 small nuclear ribonucleoprotein 70 kDa	SNRNP70	4	4	4	2	3	2	3	10	50.617	428	0.61842	0.82871	1.088	1.3744	200420000	48946000	30337000	55556000	65580000
Histone-lysine N-methyltransferase 2B	KMT2B	3	20	19	16	15	16	14	10.1	293.51	2715	0.54726	0.82794	0.77507	1.0476	768970000	265010000	134940000	210930000	158090000
Probable ATP-dependent RNA helicase DDX46	DDX46	3	21	21	16	14	16	14	19.2	117.36	1031	0.54785	0.82747	0.7506	0.97951	591870000	186190000	109280000	173950000	122450000
Histone deacetylase 2	HDAC2	13	11	7	9	8	6	4	32.3	51.998	458	0.63493	0.82365	0.81843	0.99093	938670000	222170000	164570000	307560000	244360000
E3 ubiquitin-protein ligase RING1	RING1	3	10	9	9	8	8	7	38.1	40.194	386	0.61366	0.82154	0.56931	0.7351	1686900000	506820000	360650000	499000000	320430000
ATP-dependent RNA helicase DDX24	DDX24	7	42	42	37	38	37	38	56.9	96.331	859	0.61745	0.82145	0.73468	0.971	17731000000	4919300000	3098900000	5523900000	4188900000
H/ACA ribonucleoprotein complex subunit 4	DKC1	4	29	29	26	26	26	26	64.8	57.673	514	0.64738	0.81893	1.0114	1.2744	36846000000	9701100000	6358000000	10278000000	10508000000
DNA-directed RNA polymerases I, II, and III subunit RPABC1	POLR2E	1	10	10	8	7	8	7	62.9	24.551	210	0.62673	0.81801	0.85249	0.94488	1333900000	391570000	264090000	367180000	311040000
Pre-mRNA-splicing factor CWC25 homolog	CWC25	3	9	9	6	9	6	9	19.5	49.647	425	0.59746	0.8168	0.72936	0.94799	838140000	176020000	110720000	345070000	206330000
Neuroguidin	NGDN	4	4	4	3	4	3	4	19	35.25	311	0.67431	0.81549	0.79507	0.94103	322360000	112680000	80506000	69887000	59290000
Probable ATP-dependent RNA helicase DDX41	DDX41	5	49	49	44	48	44	48	78.5	69.837	622	0.64683	0.81364	0.67138	0.85702	45911000000	12589000000	8106600000	14702000000	10514000000
U5 small nuclear ribonucleoprotein 40 kDa protein	SNRNP40	3	13	13	11	12	11	12	49.3	39.31	357	0.57601	0.81209	0.87723	1.1373	1299200000	381000000	235400000	352310000	330530000
UV excision repair protein RAD23 homolog B	RAD23B	6	19	16	19	17	16	15	60.6	43.171	409	0.62956	0.81168	0.83224	1.0669	33243000000	9300800000	6383600000	9343400000	8215300000
Protein CMSS1	CMSS1	3	5	5	4	3	4	3	24.4	26.228	225	0.65208	0.81049	1.0847	1.3639	223220000	75780000	67244000	37931000	42270000
Uncharacterized protein C9orf114	C9orf114	2	8	8	5	8	5	8	19.9	42.008	376	0.61366	0.80988	0.56544	0.72411	697820000	169760000	109600000	256020000	162440000
Serine/arginine-rich splicing factor 3	SRSF3	2	8	7	8	5	7	4	48.4	14.203	124	0.65022	0.80934	0.76048	0.95708	10944000000	3283600000	1982200000	3218100000	2459800000
60S ribosomal protein L18	RPL18	7	4	4	3	3	3	3	27.4	18.756	164	0.52849	0.8075	0.79131	0.87774	848700000	353700000	187320000	176980000	130690000
DNA damage-binding protein 1	DDB1	19	20	20	15	15	15	15	22.9	126.97	1140	0.55578	0.80619	0.7531	1.0155	936260000	263540000	136730000	305070000	230930000
Ribosome biogenesis protein BRX1 homolog	BRIX1	1	24	24	18	22	18	22	66.6	41.401	353	0.6337	0.80541	0.64271	0.79805	20092000000	5202600000	3315500000	7150200000	4423800000
Helicase-like transcription factor	HLTF	4	31	31	25	24	25	24	34.3	113.93	1009	0.53088	0.80523	0.74856	0.9965	2703300000	816210000	448440000	798950000	639680000
Menin	MEN1	9	10	10	6	10	6	10	24.3	61.418	555	0.61437	0.80484	1.0605	1.3002	507940000	117070000	87954000	158470000	144440000
H/ACA ribonucleoprotein complex subunit 2	NHP2	4	8	8	7	7	7	7	75.2	17.201	153	0.55108	0.80423	0.88464	1.0916	3816600000	1147700000	679640000	1040000000	949290000
Signal recognition particle subunit SRP72	SRP72	4	7	7	4	7	4	7	12.8	74.605	671	0.62689	0.80395	0.87541	1.0491	271260000	72185000	35560000	80153000	83360000
Polynucleotide 5-hydroxyl-kinase NOL9	NOL9	1	11	11	8	11	8	11	18.8	79.322	702	0.61577	0.80304	0.6596	0.84208	1436000000	429350000	263390000	438320000	304890000
Enhancer of rudimentary homolog	ERH	2	5	5	5	5	5	5	45.2	12.259	104	0.64615	0.80269	1.1262	1.2564	3911800000	590190000	401160000	1354200000	1566300000
DNA-directed RNA polymerase I subunit RPA34	CD3EAP	1	17	1	16	17	1	1	56.9	54.985	510	0.628	0.80092	0.70632	0.8607	9732600000	2810800000	1836200000	2955800000	2129900000
Pre-mRNA-splicing factor 38B	PRPF38B	2	2	2	1	2	1	2	10	21.061	190	0.6329	0.8004	0.9437	1.1611	42841000	8563500	6862900	13672000	13742000
Putative oxidoreductase GLYR1	GLYR1	5	15	15	11	13	11	13	36.6	58.636	536	0.64924	0.79871	0.92666	1.1398	1732600000	458870000	317220000	487780000	468740000
NF-kappa-B-activating protein	NKAP	2	9	9	8	8	8	8	29.9	47.138	415	0.60261	0.79849	0.68375	0.86208	2442800000	698010000	424600000	763560000	556640000
Bloom syndrome protein	BLM	5	39	39	30	34	30	34	37.8	159	1417	0.53597	0.79715	0.71841	0.94763	3281600000	923750000	571930000	955580000	830320000
Fibroblast growth factor 2	FGF2	4	3	3	3	2	3	2	18.1	17.254	155	0.6521	0.79565	1.601	2.0048	405280000	151890000	87981000	64599000	100810000
U4/U6 small nuclear ribonucleoprotein Prp3	PRPF3	3	17	17	14	15	14	15	37	77.528	683	0.62602	0.79534	0.75354	0.96099	2044000000	555860000	385450000	641380000	461280000
Probable rRNA-processing protein EBP2	EBNA1BP2	1	16	16	14	14	14	14	43.5	34.852	306	0.61213	0.79481	0.66686	0.85267	12529000000	3601000000	2585400000	3808200000	2534000000
Probable U3 small nucleolar RNA-associated protein 11	UTP11L	2	5	5	4	4	4	4	20.6	30.446	253	0.64555	0.79243	0.67868	0.76221	327360000	104410000	66755000	94430000	61768000
Polyadenylate-binding protein 1;Polyadenylate-binding protein 3	PABPC1;PABPC3	27	17	12	12	16	8	12	32.6	67.138	604	0.61366	0.79006	1.2324	1.5712	2254700000	510190000	383470000	611250000	749770000
Histone H2B type 2-E;Histone H2B type 1-B;Histone H2B type 1-O;Histone H2B type 1-J;Histone H2B type 3-B	HIST2H2BE;HIST1H2BB;HIST1H2BO;HIST1H2BJ;HIST3H2BB	7	9	2	8	9	2	2	58.7	13.92	126	0.68458	0.78946	0.75282	0.82295	1172600000	182950000	165820000	467870000	356010000
Ribonuclease P protein subunit p29	POP4	2	2	2	2	2	2	2	9.5	25.424	220	0.65102	0.78837	0.61786	0.73466	38822000	11477000	7421100	11216000	8708100
Heat shock 70 kDa protein 1A/1B	HSPA1A	10	9	4	6	9	3	4	16.4	77.405	708	0.59152	0.78635	0.67966	0.82782	500730000	137120000	95933000	162850000	104830000
ATP synthase subunit gamma, mitochondrial;ATP synthase subunit gamma	ATP5C1	3	5	5	4	4	4	4	19.1	32.996	298	0.68956	0.78569	0.91092	1.0452	56207000	24859000	13148000	9779300	8421200
60S ribosomal protein L4	RPL4	4	18	18	18	18	18	18	46.8	45.498	406	0.63165	0.78447	0.74298	0.93369	24012000000	7036000000	4377400000	7177900000	5421000000
Splicing factor 3B subunit 2	SF3B2	7	4	4	3	2	3	2	5.3	100.23	895	0.50899	0.78336	0.87477	1.1742	130230000	56201000	25751000	23154000	25121000
Tubulin alpha-1C chain;Tubulin alpha-1B chain;Tubulin alpha-1A chain;Tubulin alpha-3C/D chain;Tubulin alpha-3E chain;Tubulin alpha-8 chain	TUBA1C;TUBA1B;KLK9;TUBA1A;TUBA3C;TUBA3E;TUBA8	32	10	4	8	9	4	4	27	57.73	519	0.57326	0.78165	0.75955	0.91895	1495200000	474720000	281530000	435650000	303300000
DNA-directed RNA polymerases I and III subunit RPAC1	POLR1C	8	13	13	13	11	13	11	54.9	39.249	346	0.61305	0.77763	0.82353	1.0825	2485700000	746940000	505020000	662530000	571210000
Max dimerization protein 4	MXD4	3	5	5	4	4	4	4	23.4	23.528	209	0.63808	0.77656	0.58667	0.73848	207560000	80532000	50545000	44731000	31748000
Peptidyl-prolyl cis-trans isomerase;Peptidyl-prolyl cis-trans isomerase H	PPIH	5	4	4	3	4	3	4	29.2	15.8	144	0.64211	0.77428	0.6767	0.82731	284990000	62538000	39788000	106710000	75958000
Unconventional myosin-Ib	MYO1B	8	25	23	20	18	18	17	28.9	128.48	1107	0.52635	0.77288	0.86407	1.1154	1110900000	329910000	179350000	298380000	303310000
Cancer/testis antigen family 45 member A4/A6;Cancer/testis antigen family 45 member A5;Cancer/testis antigen family 45 member A2;Cancer/testis antigen family 45 member A3;Cancer/testis antigen family 45 member A1	CT45A4;CT45A5;CT45A2;CT45A3;CT45A1	5	3	3	2	3	2	3	18.5	21.244	189	0.60148	0.77082	0.57374	0.67453	804680000	204220000	134470000	283240000	182740000
40S ribosomal protein S19	RPS19	1	3	3	3	3	3	3	19.3	16.06	145	0.62826	0.76911	1.166	1.3218	186300000	31629000	20603000	60827000	73237000
Nucleolar transcription factor 1	UBTF	6	27	27	22	25	22	25	34.3	89.405	764	0.59952	0.76898	1.1606	1.4916	16465000000	4428100000	3504100000	3944900000	4588100000
BCL-6 corepressor	BCOR	6	41	40	37	35	36	34	32.5	192.19	1755	0.51506	0.76756	0.51445	0.68718	3384900000	1028000000	591740000	1084800000	680420000
Histone H1.3	HIST1H1D	1	20	4	17	18	3	3	51.1	22.35	221	0.65151	0.76731	0.69162	0.79599	401080000	70379000	48317000	163030000	119350000
SNW domain-containing protein 1	SNW1	5	5	5	3	5	3	5	15.7	61.494	536	0.61753	0.75928	0.97143	1.2033	290570000	56021000	71321000	68775000	94457000
Ribosome-binding protein 1	RRBP1	20	45	45	40	39	40	39	36.8	152.47	1410	0.52082	0.75532	1.0433	1.3834	8162900000	2738100000	1394000000	2005000000	2025800000
BCL-6 corepressor-like protein 1	BCORL1	3	21	20	18	16	17	15	15.9	190.59	1785	0.51065	0.75144	0.61141	0.8031	1223300000	427140000	214310000	353710000	228130000
Histone H1x	H1FX	1	8	8	7	8	7	8	37.1	22.487	213	0.63841	0.75049	0.68881	0.77018	9424500000	2565400000	1810700000	2870700000	2177800000
40S ribosomal protein S14	RPS14	3	5	5	5	5	5	5	36.4	16.273	151	0.55375	0.75026	0.60336	0.73587	2887700000	497540000	244020000	1348300000	797830000
UV excision repair protein RAD23 homolog A	RAD23A	2	12	9	10	10	7	8	49.3	39.609	363	0.60015	0.74732	0.81313	1.0068	1416400000	390790000	238090000	421020000	366480000
Probable dimethyladenosine transferase	DIMT1	2	10	10	7	8	7	8	37.1	35.236	313	0.57547	0.7459	0.8245	0.96543	701400000	188250000	127520000	213120000	172510000
Heterochromatin protein 1-binding protein 3	HP1BP3	9	19	19	17	17	17	17	45.6	61.206	553	0.58205	0.74418	0.98642	1.2527	7360800000	1902200000	1208500000	2122400000	2127700000
Probable ATP-dependent RNA helicase DDX52	DDX52	4	18	18	13	16	13	16	38.1	67.497	599	0.58265	0.73959	0.9822	1.2149	3050400000	883330000	499370000	849910000	817820000
RuvB-like 1	RUVBL1	3	11	11	7	10	7	10	33.6	50.227	456	0.60996	0.73939	0.77759	0.94389	593700000	164070000	105820000	188000000	135810000
MKI67 FHA domain-interacting nucleolar phosphoprotein	NIFK	4	14	14	11	13	11	13	53.2	34.222	293	0.62868	0.7386	0.59603	0.67629	3344000000	844790000	537030000	1220900000	741300000
Histone H1.4	HIST1H1E	2	18	2	16	17	2	2	42.9	21.865	219	0.63385	0.73529	0.56516	0.68865	846910000	265840000	178380000	239750000	162940000
RNA exonuclease 4	REXO4	1	4	4	3	2	3	2	10	46.671	422	0.56182	0.73314	0.62118	0.79903	234000000	81742000	53126000	54670000	44459000
Probable ATP-dependent RNA helicase DDX31	DDX31	6	18	18	10	18	10	18	29.5	80.945	722	0.5493	0.73283	0.85356	1.0853	1479400000	335080000	205370000	466240000	472720000
Centrin-2	CETN2	2	16	16	11	16	11	16	72.1	19.738	172	0.69585	0.73167	0.86437	0.93797	20599000000	2810300000	2026000000	8292700000	7470300000
Three-prime repair exonuclease 1	TREX1	4	13	13	9	12	9	12	57.3	33.212	314	0.62522	0.73128	1.075	1.3376	1597200000	416370000	282740000	419910000	478170000
Pre-mRNA-splicing factor SYF2	SYF2	1	2	2	2	2	2	2	16.9	28.722	243	0.59081	0.73104	1.1895	1.3274	154410000	30766000	21730000	47749000	54163000
Zinc finger protein 638	ZNF638	9	10	10	8	6	8	6	7.4	220.62	1978	0.50415	0.73073	1.3069	1.7406	293440000	71954000	85276000	45756000	90457000
Serine/arginine-rich splicing factor 2	SRSF2	6	5	5	5	5	5	5	26.7	25.476	221	0.51819	0.73027	0.94972	1.2055	5015500000	1138200000	680780000	1610000000	1586500000
Polyadenylate-binding protein 4	PABPC4	8	10	5	8	8	4	4	22.9	67.97	615	0.57314	0.72963	1.1586	1.4472	273110000	71236000	46128000	69111000	86637000
40S ribosomal protein S20	RPS20	5	2	2	2	2	2	2	19.3	13.373	119	0.56726	0.72953	0.98353	1.1512	125660000	25073000	13888000	41333000	45368000
HMG box transcription factor BBX	BBX	6	10	10	7	7	7	7	17.1	101.55	911	0.55108	0.727	0.61573	0.77552	673890000	304290000	145860000	130370000	93372000
Supervillin	SVIL	4	25	4	19	19	2	2	14.8	247.74	2214	0.50277	0.72563	0.84412	1.079	706130000	189180000	108670000	222140000	186130000
Serine/arginine-rich splicing factor 9	SRSF9	2	6	5	4	5	3	4	26.2	25.542	221	0.55291	0.72548	1.0811	1.358	146890000	44147000	29495000	28993000	44257000
Something about silencing protein 10	UTP3	1	12	12	11	11	11	11	26.9	54.557	479	0.52134	0.72439	0.67603	0.83934	1204900000	353050000	216430000	401560000	233820000
Heterogeneous nuclear ribonucleoprotein H;Heterogeneous nuclear ribonucleoprotein H, N-terminally processed	HNRNPH1	29	10	10	8	10	8	10	30.9	51.229	472	0.5617	0.72258	0.99059	1.2599	1055800000	317260000	246920000	228610000	263000000
Importin subunit alpha-1	KPNA2	1	8	8	5	7	5	7	19.1	57.861	529	0.54163	0.72191	0.84551	1.0552	462630000	122660000	67040000	147810000	125120000
Histone H4	HIST1H4A	1	6	6	5	6	5	6	51.5	11.367	103	0.60094	0.72104	0.65949	0.76223	8543500000	870630000	521840000	4266900000	2884200000
Cilia- and flagella-associated protein 20	CFAP20	1	4	4	4	3	4	3	20.7	22.774	193	0.60627	0.71975	0.70282	0.79435	220790000	77867000	49321000	50066000	43537000
RNA-binding protein 34	RBM34	5	17	17	11	13	11	13	48.4	48.564	430	0.57394	0.7189	0.97587	1.1603	1759500000	446420000	244260000	549560000	519220000
40S ribosomal protein S7	RPS7	2	7	7	7	6	7	6	47.9	22.127	194	0.59881	0.71375	0.92713	1.1125	1180100000	406260000	257540000	254680000	261650000
Putative RNA-binding protein 15	RBM15	3	4	4	2	4	2	4	5.4	104.75	957	0.49747	0.7136	0.94819	1.227	69737000	20965000	7027900	23752000	17993000
Dual specificity protein kinase CLK3	CLK3	5	10	10	7	7	7	7	27.6	58.588	490	0.53177	0.7096	0.86971	1.0649	507940000	159760000	101030000	120720000	126420000
DnaJ homolog subfamily C member 9	DNAJC9	1	13	13	11	12	11	12	48.8	29.909	260	0.58695	0.70935	0.84255	1.0198	2693900000	826500000	505990000	716200000	645220000
Polymerase I and transcript release factor	PTRF	4	5	5	2	5	2	5	12.8	43.476	390	0.53169	0.70921	1.2403	1.5693	318830000	73704000	64317000	70570000	110230000
Protein DEK	DEK	7	14	14	13	13	13	13	37.3	42.674	375	0.59459	0.70842	1.1183	1.3477	6582600000	2103500000	1289200000	1505000000	1684900000
Histone H3;Histone H3.3C;Histone H3.2;Histone H3.1t;Histone H3.3;Histone H3.1	HIST2H3PS2;H3F3A;H3F3C;HIST2H3A;HIST3H3;HIST1H3A	7	3	3	3	3	3	3	19.9	15.43	136	0.49238	0.70832	0.55356	0.69301	4573900000	556630000	320980000	2346300000	1350000000
Microtubule-associated protein 1A;MAP1A heavy chain;MAP1 light chain LC2	MAP1A	4	29	26	25	24	24	21	11.9	331.25	3041	0.55429	0.708	0.80777	1.0124	11756000000	3291500000	1746700000	3621700000	3096400000
Chromobox protein homolog 3	CBX3	6	5	5	3	3	3	3	23.5	20.811	183	0.62492	0.70265	0.61538	0.68766	380580000	149760000	83325000	92697000	54791000
Hepatoma-derived growth factor-related protein 2	HDGFRP2	5	5	5	3	5	3	5	11	74.229	670	0.58218	0.70208	0.9098	1.108	447930000	129260000	82086000	121550000	115040000
Nucleolar and coiled-body phosphoprotein 1	NOLC1	3	21	21	18	20	18	20	33.6	73.602	699	0.49085	0.70109	0.83129	1.0608	9656800000	2940200000	1508000000	2776000000	2432600000
Myosin-9	MYH9	22	126	112	113	120	100	108	58.5	226.53	1960	0.47455	0.69939	0.758	1.0112	109180000000	32624000000	16002000000	34102000000	26454000000
Antigen KI-67	MKI67	3	215	19	201	195	18	17	68.2	358.62	3255	0.47973	0.69629	0.67379	0.89485	376090000000	124660000000	63706000000	109490000000	78242000000
Unconventional myosin-Va	MYO5A	19	68	68	55	60	55	60	41.1	212.27	1828	0.4651	0.69419	0.78244	1.0175	7616600000	3192500000	937210000	1940600000	1546300000
SPATS2-like protein	SPATS2L	10	28	2	25	26	2	1	56.5	61.728	558	0.56428	0.69292	1.0439	1.3232	17570000000	5037300000	2919400000	4693400000	4920300000
DNA dC->dU-editing enzyme APOBEC-3C	APOBEC3C	4	5	5	4	5	4	5	36.3	22.826	190	0.53203	0.69178	1.0807	1.3552	357800000	116590000	50016000	94890000	96306000
Unconventional myosin-Ic	MYO1C	6	36	35	29	35	29	34	40.4	119.52	1044	0.48183	0.69087	0.79454	1.0498	4599800000	1214600000	639340000	1549400000	1196500000
Coiled-coil domain-containing protein 137	CCDC137	1	5	5	5	3	5	3	17.3	33.231	289	0.52574	0.68876	0.68201	0.85776	724290000	517180000	104460000	64499000	38143000
Deoxynucleotidyltransferase terminal-interacting protein 1	DNTTIP1	6	3	3	2	1	2	1	15.9	27.264	239	0.54067	0.68797	1.0489	1.2162	132040000	45364000	27144000	28024000	31504000
RNA-binding protein 39	RBM39;RNPC2	25	18	18	15	17	15	17	53.1	58.656	524	0.51757	0.68653	1.0156	1.2992	8105700000	1730900000	2324700000	2045500000	2004600000
Leucine-rich repeat-containing protein 59	LRRC59	1	9	9	9	6	9	6	37.8	34.93	307	0.58335	0.68613	0.96111	1.1019	1250200000	518690000	303040000	208080000	220410000
Protein KRI1 homolog	KRI1	9	23	23	18	21	18	21	39.2	83.251	709	0.5372	0.68545	0.64712	0.80754	7844200000	2158800000	1186300000	2714800000	1784300000
Myosin-14	MYH14	9	9	2	7	9	1	2	4.1	231.21	2028	0.52433	0.68516	0.80562	1.04	3169800000	661310000	354540000	1177300000	976680000
Tubulin beta-4A chain	TUBB4A;TUBB6	3	6	0	5	5	0	0	16	49.585	444	0.47776	0.68433	0.81439	1.0335	49494000	21494000	7486700	10542000	9971700
Serine/Arginine-related protein 53	RSRC1	4	3	3	3	2	3	2	14.5	31.528	276	0.51845	0.68384	0.79064	0.95102	115990000	43294000	33525000	21861000	17310000
H/ACA ribonucleoprotein complex subunit 1	GAR1	2	6	6	6	4	6	4	34.7	20.834	199	0.58177	0.68247	0.94913	1.0515	7138800000	2240900000	1470000000	1692100000	1735800000
DnaJ homolog subfamily A member 1	DNAJA1	3	4	4	2	3	2	3	24.2	27.543	240	0.55391	0.68096	0.87175	1.0472	102950000	31359000	11996000	33333000	26264000
Scaffold attachment factor B2;Scaffold attachment factor B1	SAFB2;SAFB	9	4	4	2	3	2	3	5.9	107.47	953	0.45264	0.68047	2.0467	2.7611	64011000	18881000	8174500	11589000	25367000
ATP-dependent RNA helicase DDX55	DDX55	5	15	15	11	12	11	12	31.3	68.546	600	0.52956	0.68024	0.86428	1.1164	1123800000	292440000	161480000	345280000	324550000
KRR1 small subunit processome component homolog	KRR1	2	17	17	15	17	15	17	38.8	43.664	381	0.55581	0.67917	0.64723	0.78536	11067000000	3297500000	1813300000	3562500000	2393200000
Calmodulin	CALM1;CALM2;CALM3	9	3	3	2	3	2	3	29.3	16.966	150	0.5729	0.67701	0.92278	1.124	175260000	39763000	22490000	64923000	48081000
Polycomb group RING finger protein 6	PCGF6	2	9	9	9	7	9	7	43.4	39.047	350	0.55767	0.67524	0.41618	0.50613	998470000	337310000	196330000	330190000	134640000
F-actin-capping protein subunit beta	CAPZB	8	5	5	5	3	5	3	16.9	30.628	272	0.53406	0.67164	0.81583	0.99356	133560000	50464000	27097000	30307000	25692000
Cleavage and polyadenylation specificity factor subunit 6	CPSF6	5	3	3	2	2	2	2	7.7	52.269	478	0.52416	0.67159	0.88068	1.0865	90602000	34998000	16748000	19898000	18958000
Nuclease-sensitive element-binding protein 1	YBX1	8	8	8	5	6	5	6	42	35.924	324	0.53248	0.67141	1.0574	1.325	511080000	148700000	83076000	133260000	146050000
Tubulin beta chain;Tubulin beta-4B chain;Tubulin beta-2B chain;Tubulin beta-2A chain	TUBB;TUBB4B;TUBB2B;TUBB2A	27	7	3	5	6	2	3	22.3	41.742	372	0.47967	0.67077	0.59535	0.75756	607980000	192580000	97979000	193890000	123530000
Guanine nucleotide-binding protein subunit beta-2-like 1;Guanine nucleotide-binding protein subunit beta-2-like 1, N-terminally processed	GNB2L1	20	4	4	4	2	4	2	20.5	35.076	317	0.51068	0.67014	1.0911	1.3725	153680000	62313000	34549000	28097000	28724000
Core-binding factor subunit beta	CBFB	2	2	2	1	2	1	2	14.3	21.508	182	0.51321	0.66921	0.65642	0.81921	89883000	25111000	13424000	28862000	22487000
40S ribosomal protein S3	RPS3	12	3	3	2	3	2	3	17.7	26.688	243	0.51404	0.66837	1.083	1.3638	173280000	50633000	23633000	51924000	47090000
Replication factor C subunit 1	RFC1	5	54	49	49	49	44	44	49.1	128.18	1147	0.45712	0.66455	1.0919	1.4485	40206000000	13242000000	6229200000	9974300000	10761000000
Ribosomal L1 domain-containing protein 1	RSL1D1	2	17	17	13	16	13	16	37.6	54.972	490	0.52221	0.66386	1.2014	1.5222	4049500000	1193100000	665450000	995870000	1195100000
BUD13 homolog	BUD13	2	7	7	7	5	7	5	12.6	70.52	619	0.54618	0.65986	0.66568	0.83581	870470000	280710000	186120000	236570000	167080000
Serine/threonine-protein phosphatase;Serine/threonine-protein phosphatase PP1-gamma catalytic subunit	PPP1CC	9	15	2	14	12	2	2	63.2	34.95	304	0.51582	0.65776	0.58642	0.70872	5070700000	1759400000	987310000	1458900000	865150000
Myosin light polypeptide 6	PDE6H;MYL6	14	6	6	6	5	6	5	47.4	15.021	135	0.49315	0.65569	0.75608	0.88481	1751600000	488330000	230680000	593610000	438980000
Zinc finger protein 512B	ZNF512B	1	31	31	16	26	16	26	37.8	97.263	892	0.45681	0.65517	0.90018	1.1961	2021500000	531460000	260020000	599140000	630900000
PIN2/TERF1-interacting telomerase inhibitor 1	PINX1	6	3	3	2	3	2	3	14.9	37.034	328	0.53192	0.6536	0.61494	0.76799	332390000	71227000	42493000	119010000	99659000
60S ribosomal protein L9	RPL9	5	2	2	2	2	2	2	22.4	16.944	147	0.5443	0.64719	0.68592	0.77665	89979000	37699000	21352000	16494000	14434000
Myosin regulatory light chain 12B	MYL12B	1	10	1	9	9	0	1	80.2	19.779	172	0.50129	0.64226	0.74963	0.91006	3704800000	989370000	510600000	1223900000	980920000
ATP-binding cassette sub-family F member 1	ABCF1	9	22	21	17	17	17	16	33.1	91.679	807	0.46808	0.63929	1.1228	1.4913	1824800000	506070000	292320000	473460000	553000000
Ribosome biogenesis protein BMS1 homolog	BMS1	3	18	18	12	17	12	17	16.8	145.81	1282	0.43056	0.63543	0.96613	1.25	956140000	266500000	121110000	285920000	282620000
Heat shock protein beta-1	HSPB1	3	2	2	2	2	2	2	14	20.406	186	0.50955	0.63457	0.94608	1.1222	166150000	28405000	15800000	107090000	14852000
40S ribosomal protein S2	RPS2	7	4	4	4	2	4	2	18.7	25.211	235	0.53303	0.63187	1.1323	1.2742	127920000	46237000	25579000	26440000	29666000
Single-stranded DNA-binding protein, mitochondrial	SSBP1	3	6	6	5	5	5	5	47.4	15.713	135	0.41583	0.6293	0.98639	1.2211	1080500000	229260000	88477000	370180000	392620000
Spermatogenesis-associated serine-rich protein 2	SPATS2	3	13	13	11	12	11	12	34.1	59.544	545	0.49365	0.62568	0.938	1.1537	1305200000	378220000	193100000	372220000	361650000
Serine/threonine-protein phosphatase PP1-beta catalytic subunit;Serine/threonine-protein phosphatase	PPP1CB	4	15	5	13	12	4	3	58.4	37.186	327	0.47876	0.62417	0.6283	0.78954	335470000	137240000	74564000	76563000	47098000
40S ribosomal protein SA	RPSA;RPSAP58	4	8	8	6	6	6	6	47	29.505	264	0.50502	0.61865	1.089	1.3456	421550000	149200000	72087000	99644000	100620000
Centromere protein P	CENPP	3	3	3	3	3	3	3	10.1	33.165	288	0.47903	0.61759	0.62144	0.76129	63391000	20262000	10967000	19062000	13100000
Protein virilizer homolog	KIAA1429	5	7	7	6	4	6	4	4.7	201.05	1797	0.42356	0.61729	0.78535	1.0339	160000000	70684000	30426000	29534000	29355000
Actin, cytoplasmic 1;Actin, cytoplasmic 1, N-terminally processed	ACTB	7	22	1	20	22	1	1	72.3	41.736	375	0.49484	0.61467	0.77535	0.99814	59479000000	19326000000	9315900000	17201000000	13637000000
ATP-dependent RNA helicase DDX50	DDX50	2	12	10	9	12	7	10	21.2	79.946	711	0.45979	0.61341	1.238	1.5836	523830000	176570000	82007000	116020000	149230000
ELM2 and SANT domain-containing protein 1	ELMSAN1	2	14	14	8	13	8	13	20.1	111.92	1019	0.41155	0.60989	0.87926	1.1605	541650000	124990000	63178000	193380000	160100000
Nuclear mitotic apparatus protein 1	NUMA1	8	7	7	5	4	5	4	4.9	236.51	2101	0.40731	0.6027	1.4684	1.8716	75807000	32435000	8991200	12957000	21425000
Prelamin-A/C;Lamin-A/C	LMNA	10	14	14	11	8	11	8	25.7	65.134	572	0.49243	0.60186	0.28955	0.36095	474150000	222150000	71639000	118770000	61589000
Nuclear autoantigen Sp-100	SP100	17	6	5	2	4	1	4	7.3	100.42	879	0.49675	0.59501	1.0716	1.296	104270000	12335000	9376800	34126000	48437000
ATP-dependent RNA helicase A	DHX9	3	14	14	10	9	10	9	13.9	140.96	1270	0.40039	0.59495	1.2856	1.6781	228570000	91441000	41842000	45527000	49756000
Bifunctional polynucleotide phosphatase/kinase;Polynucleotide 3-phosphatase;Polynucleotide 5-hydroxyl-kinase	PNKP	1	8	8	7	7	7	7	21.1	57.076	521	0.44553	0.59229	0.55034	0.68658	510220000	166860000	125740000	127140000	90472000
Transcription elongation factor B polypeptide 3	TCEB3	1	2	2	2	2	2	2	4.1	89.908	798	0.43671	0.59203	0.6422	0.81568	77584000	30587000	14300000	20375000	12322000
Probable ATP-dependent RNA helicase DDX56	DDX56	4	2	2	2	2	2	2	4.3	57.274	507	0.44087	0.58914	0.45372	0.56352	102900000	36344000	17979000	34174000	14406000
Mediator of DNA damage checkpoint protein 1	MDC1	18	63	63	58	52	58	52	47.7	226.66	2089	0.39132	0.58705	0.78668	1.0301	15971000000	5229900000	2340200000	4630100000	3770400000
Ribosome production factor 2 homolog	RPF2	3	8	8	6	7	6	7	31.7	35.582	306	0.47108	0.58459	0.5116	0.64254	938870000	319280000	159320000	293620000	166650000
Heterogeneous nuclear ribonucleoprotein M	HNRNPM	4	24	24	17	22	17	22	45.3	73.62	691	0.46491	0.58379	1.0456	1.3053	4255900000	1284900000	685840000	1176000000	1109100000
Matrin-3	MATR3	20	11	11	5	11	5	11	19	99.966	895	0.47761	0.57817	1.1663	1.5371	308920000	64033000	32299000	99613000	112980000
Tropomyosin alpha-4 chain	TPM4	2	10	6	9	5	5	3	29.8	28.521	248	0.424	0.57781	0.73665	0.90129	575310000	219240000	126110000	124540000	105420000
U4/U6.U5 tri-snRNP-associated protein 2	USP39	7	8	8	7	5	7	5	19.3	65.38	565	0.46982	0.57348	0.93474	1.1463	537560000	244140000	100680000	96135000	96603000
DNA ligase 3	LIG3	2	41	41	33	38	33	38	45.8	112.91	1009	0.43746	0.57233	1.0026	1.2646	10898000000	3439800000	1663400000	2825500000	2969500000
Rab11 family-interacting protein 5	RAB11FIP5	1	6	6	6	6	6	6	15.5	70.414	653	0.42533	0.57121	0.35558	0.45295	313030000	118570000	47612000	107120000	39728000
Pleiotropic regulator 1	PLRG1	8	9	9	8	5	8	5	28.4	57.181	514	0.44641	0.57092	0.82462	1.0359	337530000	166420000	50292000	63457000	57367000
Nucleolar and spindle-associated protein 1	NUSAP1	9	16	16	13	15	13	15	40.5	49.323	440	0.45856	0.57077	0.92332	1.1537	1520700000	363190000	197760000	483530000	476190000
Replication factor C subunit 2	RFC2	4	20	20	20	18	20	18	72	39.157	354	0.44822	0.56737	1.1575	1.4779	12219000000	4024300000	1922800000	2913200000	3358900000
Alpha-actinin-4	ACTN4	18	5	2	4	2	2	0	7.1	104.85	911	0.44494	0.56675	0.52268	0.63749	95569000	40993000	9142200	28179000	17254000
Replication factor C subunit 5	RFC5	8	21	21	20	20	20	20	69.7	38.496	340	0.45296	0.55955	1.1808	1.4564	13690000000	4313900000	1962400000	3468300000	3945800000
ATP synthase subunit alpha, mitochondrial	ATP5A1	2	5	5	3	4	3	4	14.3	54.493	503	0.43647	0.55451	0.77328	0.98467	147430000	33626000	13910000	60805000	39090000
Unconventional myosin-Ie	MYO1E	8	22	22	16	19	16	19	23.1	127.06	1108	0.37322	0.55283	0.67354	0.8702	1350800000	478670000	204710000	389840000	277560000
Actin, alpha skeletal muscle;Actin, alpha cardiac muscle 1;Actin, gamma-enteric smooth muscle;Actin, aortic smooth muscle	ACTA1;ACTC1;ACTG2;ACTA2	14	14	2	13	14	2	2	36.6	42.051	377	0.45359	0.55218	0.63251	0.75563	59758000	13687000	8340900	24050000	13681000
E3 ubiquitin-protein ligase TRIP12	TRIP12	1	52	2	50	46	2	2	41.9	192.07	1722	0.36846	0.55143	1.2876	1.7387	896770000	398010000	151160000	153470000	194120000
Tropomyosin alpha-3 chain	TPM3	14	9	7	6	6	4	6	37.5	27.174	232	0.43054	0.55131	0.65146	0.81961	338010000	95400000	41738000	144700000	56172000
Replication factor C subunit 3	RFC3	3	25	25	20	24	20	24	77.2	40.556	356	0.45614	0.54451	1.1442	1.4252	14183000000	4508000000	2094700000	3517200000	4063200000
Interleukin enhancer-binding factor 2	ILF2	1	5	5	4	4	4	4	17.4	43.062	390	0.4205	0.53579	1.3963	1.7411	247920000	94014000	42382000	44577000	66945000
Dual specificity protein kinase CLK2	CLK2	4	3	3	3	2	3	2	7.2	59.874	497	0.3957	0.53348	0.9542	1.1943	144740000	54122000	32307000	33442000	24870000
Replication factor C subunit 4	RFC4	8	22	22	21	19	21	19	63.1	39.681	363	0.42898	0.53228	1.1252	1.3883	15280000000	5098400000	2397700000	3633500000	4150100000
Cleavage and polyadenylation specificity factor subunit 5	NUDT21	2	7	7	7	4	7	4	33.9	26.227	227	0.42754	0.53186	0.9587	1.0997	346210000	152190000	75532000	59478000	59011000
Ankycorbin	RAI14	19	37	37	27	34	27	34	44.2	109.16	973	0.36448	0.53164	0.63921	0.81659	3337300000	1000900000	413710000	1161800000	760840000
	MPRIP	2	14	4	11	13	3	3	12.3	158.41	1403	0.34456	0.52699	0.64381	0.85095	55423000	22033000	4619900	17948000	10822000
N-acylneuraminate cytidylyltransferase	CMAS	4	9	9	8	7	8	7	25.6	48.379	434	0.40109	0.52614	0.7563	0.94505	364940000	147200000	64940000	80078000	72724000
Pre-mRNA-splicing factor SPF27	BCAS2	1	5	5	5	5	5	5	32.9	26.131	225	0.41532	0.52499	0.85049	1.0764	1161700000	537670000	314390000	154230000	155410000
39S ribosomal protein L38, mitochondrial	MRPL38	1	2	2	2	2	2	2	5.5	44.596	380	0.38448	0.52414	1.1744	1.4949	39058000	12491000	5977000	8203000	12387000
F-actin-capping protein subunit alpha-1	CAPZA1	1	6	4	5	6	3	4	33.9	32.922	286	0.44416	0.52165	0.68328	0.80683	286080000	75034000	41478000	89698000	79869000
RNA-binding protein 14	RBM14	7	17	14	13	14	10	12	30	69.491	669	0.39948	0.51699	0.84411	1.0926	1922100000	674700000	278450000	520130000	448850000
RNA 3-terminal phosphate cyclase-like protein	RCL1	5	11	11	10	7	10	7	32.7	40.842	373	0.39912	0.51683	0.89492	1.1613	453830000	176280000	76089000	105470000	95984000
Tropomyosin alpha-1 chain	TPM1	6	6	3	5	4	2	3	25.3	28.524	245	0.39502	0.5163	0.66171	0.83368	139080000	47259000	20442000	41208000	30171000
40S ribosomal protein S5;40S ribosomal protein S5, N-terminally processed	RPS5	1	3	3	2	3	2	3	15.7	22.876	204	0.41345	0.51524	0.94496	1.172	132080000	37465000	17364000	38363000	38883000
Dimethyladenosine transferase 1, mitochondrial	TFB1M	1	6	6	6	5	6	5	23.1	39.542	346	0.42053	0.50991	0.74362	0.91081	496480000	188370000	82995000	126600000	98513000
Werner syndrome ATP-dependent helicase	WRN	1	25	25	17	19	17	19	20.6	162.46	1432	0.36337	0.5084	0.90597	1.2056	1281500000	422800000	190630000	349010000	319000000
Myosin phosphatase Rho-interacting protein	MPRIP	15	31	21	24	29	16	19	39.9	116.53	1025	0.34714	0.50216	0.5669	0.73288	2914800000	958330000	355130000	1074800000	526580000
Unconventional myosin-Id	MYO1D	2	5	5	1	5	1	5	5.6	116.2	1006	0.38105	0.49869	0.62093	0.83156	332520000	15380000	5634400	188270000	123230000
E3 ubiquitin-protein ligase TRIP12	TRIP12	8	59	9	55	53	7	9	39.2	225.52	2040	0.33331	0.4947	1.1387	1.4981	12259000000	4298900000	1641700000	2869100000	3449300000
ATP-dependent RNA helicase DDX54	DDX54	1	47	2	38	45	1	2	57.9	98.594	881	0.3928	0.48776	0.70665	0.92916	19554000000	6687600000	2288200000	6077100000	4501400000
DNA-binding protein SMUBP-2	IGHMBP2	3	12	12	6	10	6	10	14.3	109.15	993	0.32441	0.48687	1.9392	2.5027	328020000	75556000	51157000	67689000	133620000
Aprataxin	APTX	21	9	9	8	8	8	8	39.2	39.104	342	0.38586	0.48667	1.1131	1.3974	2012300000	673820000	260730000	485040000	592710000
Cell division cycle 5-like protein	CDC5L	2	25	25	19	18	19	18	43.9	89.167	775	0.37634	0.48517	0.82022	0.97462	2388800000	1009000000	349630000	562460000	467730000
Pyruvate kinase PKM	PKM	9	37	37	35	34	35	34	77	57.936	531	0.37355	0.48049	1.1635	1.432	41922000000	18173000000	6825000000	7926500000	8996800000
Nucleolar protein 6	NOL6	5	4	4	3	2	3	2	7.7	78.141	702	0.32932	0.48038	1.5824	2.0827	43610000	22569000	5659500	4798000	10583000
Pre-mRNA-splicing regulator WTAP	WTAP	2	2	2	2	2	2	2	7.1	44.243	396	0.37257	0.47777	0.83945	1.0221	76648000	25697000	8427300	23425000	19098000
DNA repair protein XRCC1	XRCC1;FOXH1	3	19	19	15	15	15	15	39.5	69.476	633	0.3535	0.47415	0.93598	1.1212	2906500000	892790000	354570000	885940000	773250000
Regulator of nonsense transcripts 1	UPF1	2	3	3	3	3	3	3	3.8	123.03	1118	0.31094	0.46399	1.1835	1.5954	36534000	9663100	2911200	11995000	11964000
Poly [ADP-ribose] polymerase 2	PARP2	5	10	10	9	10	9	10	25.4	60.214	531	0.35699	0.4621	0.56723	0.72581	922570000	300390000	119310000	302350000	200510000
Nucleolar RNA helicase 2	DDX21	3	46	44	41	46	39	44	58.9	87.343	783	0.38046	0.46191	1.3986	1.7048	59721000000	18560000000	7327000000	13880000000	19954000000
RNA-binding motif protein, X chromosome;RNA-binding motif protein, X chromosome, N-terminally processed;RNA binding motif protein, X-linked-like-1	RBMX;RBMXL1	6	8	8	8	6	8	6	20.5	42.331	391	0.38702	0.46072	1.575	1.9765	1516800000	514820000	172220000	374790000	454930000
TATA-binding protein-associated factor 2N	TAF15	3	5	3	4	5	2	3	12.9	61.557	589	0.36422	0.44024	1.8901	2.2376	281240000	99836000	29633000	55322000	96448000
DnaJ homolog subfamily C member 13	DNAJC13	4	32	32	31	23	31	23	18.4	254.41	2243	0.29796	0.43523	1.1828	1.5707	1838700000	636840000	412730000	501440000	287660000
Putative elongation factor 1-alpha-like 3;Elongation factor 1-alpha 1;Elongation factor 1-alpha 2	EEF1A1;EEF1A1P5;EEF1A2	8	4	4	3	2	3	2	12.9	47.869	441	0.32879	0.43386	0.22191	0.27242	194320000	115330000	26552000	43052000	9384400
FACT complex subunit SPT16	SUPT16H	2	4	4	2	3	2	3	4.5	119.91	1047	0.29032	0.42898	0.33817	0.45819	68480000	20539000	8110600	28937000	10894000
Pre-mRNA-processing factor 19	PRPF19	5	13	13	10	10	10	10	39.9	55.18	504	0.3227	0.4267	0.79962	1.0266	3044300000	1322500000	482310000	637480000	602040000
Ribosomal RNA-processing protein 8	RRP8	3	7	7	5	5	5	5	20.6	50.714	456	0.34604	0.42425	0.7422	0.92116	370910000	130570000	54301000	107180000	78858000
Probable ATP-dependent RNA helicase YTHDC2	YTHDC2	5	10	10	8	3	8	3	8.3	160.25	1430	0.26455	0.40047	2.0881	2.6816	118380000	63633000	14126000	14809000	25811000
Splicing factor U2AF 35 kDa subunit;Splicing factor U2AF 26 kDa subunit	U2AF1;U2AF1L4	7	6	6	4	4	4	4	30.4	27.872	240	0.31364	0.39861	0.99133	1.1161	560970000	306810000	108290000	14449000	131420000
14-3-3 protein theta	YWHAQ	3	4	2	4	2	2	1	18	27.764	245	0.32777	0.38889	0.81317	1.0157	98793000	53852000	16628000	18140000	10172000
ATP-dependent DNA helicase Q1	RECQL	6	20	20	18	20	18	20	40.2	73.457	649	0.31302	0.38721	1.64	1.9913	4715600000	1918800000	656310000	952120000	1188300000
RNA-binding protein FUS	FUS	5	6	4	6	6	4	4	21.7	44.812	429	0.30911	0.38672	1.1436	1.4524	3126200000	1296100000	391360000	638120000	800630000
Probable ATP-dependent RNA helicase DDX17	DDX17	8	16	11	14	13	9	8	26.2	81.067	737	0.29392	0.37628	1.0618	1.3107	2714900000	1339500000	362630000	500550000	512190000
Probable 28S rRNA (cytosine(4447)-C(5))-methyltransferase	NOP2	10	29	29	24	27	24	27	39.9	89.301	812	0.2942	0.37067	0.56851	0.71073	12672000000	4604600000	1504500000	4125700000	2437400000
Probable ATP-dependent RNA helicase DDX5	DDX5	2	15	10	11	14	6	9	30	61.635	544	0.27878	0.36562	1.0921	1.2809	805860000	249240000	90507000	224180000	241930000
Splicing factor U2AF 65 kDa subunit	U2AF2	2	10	10	9	7	9	7	39.7	53.12	471	0.29242	0.36535	0.98467	1.1732	1515500000	709810000	202630000	341740000	261330000
ATP-dependent RNA helicase DDX3X;ATP-dependent RNA helicase DDX3Y	DDX3X;DDX3Y	10	15	14	12	13	11	12	30.7	73.243	662	0.29573	0.35984	1.2156	1.5368	1662200000	704770000	223210000	328780000	405390000
PC4 and SFRS1-interacting protein	PSIP1	2	11	11	7	11	7	11	24.7	60.103	530	0.27082	0.35334	1.0828	1.2844	1348900000	558440000	165060000	307460000	317940000
Activated RNA polymerase II transcriptional coactivator p15	SUB1	4	7	7	6	7	6	7	59.8	14.395	127	0.27963	0.3379	1.8161	2.1058	1284900000	209170000	56663000	338960000	680120000
Transcription factor A, mitochondrial	TFAM	2	4	4	4	3	4	3	15.4	29.096	246	0.28396	0.33733	2.1549	1.7123	244640000	110590000	17859000	37869000	78324000
60S ribosome subunit biogenesis protein NIP7 homolog	NIP7	2	12	12	11	6	11	6	76.1	20.462	180	0.28075	0.33644	0.49879	0.61335	3576100000	1810700000	372030000	1012200000	381130000
Neuroblast differentiation-associated protein AHNAK	AHNAK	2	12	12	12	2	12	2	7.9	629.09	5890	0.22052	0.32066	1.031	1.3133	236410000	161970000	45459000	14594000	14394000
Casein kinase II subunit alpha	CSNK2A1	4	4	4	2	3	2	3	13.8	45.31	385	0.2448	0.31941	0.75505	0.9033	110790000	32156000	7642400	35507000	35481000
Poly(rC)-binding protein 1	PCBP1	15	13	10	10	12	8	9	55.1	37.497	356	0.24576	0.31863	1.7625	2.1323	2310400000	841290000	210020000	502350000	756740000
Heterogeneous nuclear ribonucleoprotein U	HNRNPU	4	13	13	11	12	11	12	21	88.979	806	0.21505	0.29829	1.155	1.5337	1942300000	1007500000	229170000	328480000	377190000
Gamma-interferon-inducible protein 16	IFI16	11	22	22	19	16	19	16	37.4	75.935	673	0.23325	0.29447	0.9065	1.1387	1618200000	797920000	247240000	294660000	278380000
Dystonin	DST	22	32	32	31	11	31	11	5.3	847.96	7461	0.18488	0.27274	1.0327	1.3864	611010000	340460000	126310000	75440000	68802000
Poly(rC)-binding protein 2;Poly(rC)-binding protein 3	PCBP2;PCBP3	24	6	3	4	6	2	3	24	33.8	321	0.22297	0.27054	1.3899	1.6162	257190000	136000000	24553000	40792000	55840000
RNA-binding protein EWS	EWSR1	9	3	3	3	3	3	3	8.6	64.929	618	0.20013	0.26882	0.7999	1.0101	359230000	147480000	39301000	94056000	78388000
Casein kinase II subunit beta	CSNK2B	3	3	3	3	2	3	2	17.1	26.925	234	0.21392	0.26423	0.75369	0.95241	97353000	54124000	12760000	16527000	13942000
S1 RNA-binding domain-containing protein 1	SRBD1	3	35	35	32	26	32	26	41.2	111.77	995	0.17411	0.26128	2.8179	3.6453	4031200000	1585100000	384670000	576360000	1485100000
Splicing factor, proline- and glutamine-rich	SFPQ	3	7	7	6	3	6	3	16.8	76.149	707	0.1647	0.21576	1.2589	1.607	405340000	269340000	30004000	42960000	63044000
Keratin, type II cytoskeletal 6B	KRT6B	39	37	1	19	33	1	0	55.9	60.066	564	0.16172	0.21539	0.029098	0.037808	10770000000	279700000	149380000	9752400000	588710000
Heterogeneous nuclear ribonucleoprotein R	HNRNPR	5	10	8	10	5	8	3	20.2	70.942	633	0.16687	0.20521	1.6113	1.9212	487470000	272140000	65669000	64981000	84684000
Nucleophosmin	NPM1	5	7	7	7	4	7	4	35.9	28.4	259	0.16309	0.18697	0.83289	0.98117	784510000	424390000	78091000	148030000	134000000
Nucleolin	NCL	7	19	19	15	18	15	18	27.6	76.613	710	0.1329	0.16409	1.3649	1.6254	7787600000	3675000000	854520000	1335000000	1923100000
60 kDa heat shock protein, mitochondrial	HSPD1	9	13	13	11	6	11	6	35.1	61.054	573	0.12019	0.15179	1.4892	1.7735	758730000	499320000	69494000	69084000	120830000
RNA binding protein fox-1 homolog;RNA binding protein fox-1 homolog 2;RNA binding protein fox-1 homolog 1;RNA binding protein fox-1 homolog 3	RBFOX1;RBFOX2;RBFOX3	30	6	6	4	4	4	4	23.3	28.437	262	0.098447	0.14445	3.8414	4.8635	223990000	98173000	3418400	16773000	105620000
Heterogeneous nuclear ribonucleoprotein K	HNRNPK	4	17	1	17	8	1	0	48.4	50.976	463	0.10954	0.14083	0.9074	1.1246	2333800000	1664700000	182050000	248780000	238260000
Heterogeneous nuclear ribonucleoprotein D0	HNRNPD	15	6	6	3	5	3	5	32.4	23.811	210	0.10342	0.13021	1.3174	1.5466	527080000	272860000	30625000	101680000	121910000
Protein RRP5 homolog	PDCD11	2	71	71	52	62	52	62	45.9	208.7	1871	0.088816	0.1297	5.5512	7.3654	9861900000	2793600000	2368700000	1137300000	3562400000
Heterogeneous nuclear ribonucleoprotein A/B	HNRNPAB	7	2	2	2	2	2	2	7.9	30.302	280	0.10553	0.12512	1.4086	1.5776	90512000	52832000	5984600	14274000	17422000
Heterogeneous nuclear ribonucleoprotein A1;Heterogeneous nuclear ribonucleoprotein A1, N-terminally processed;Heterogeneous nuclear ribonucleoprotein A1-like 2	HNRNPA1;HNRNPA1L2	14	8	7	7	2	6	2	32.2	32.679	304	0.08986	0.11507	0.53992	0.63879	512590000	349910000	37650000	103010000	22022000
THO complex subunit 4	ALYREF	2	4	4	4	2	4	2	24.6	27.557	264	0.078919	0.10238	0.8596	1.0634	546010000	376790000	31214000	71766000	66233000
Keratin, type II cytoskeletal 2 epidermal	KRT2	2	43	1	38	36	1	1	73.2	65.432	639	0.053468	0.066227	0.039738	0.049136	34964000000	14834000000	275170000	19337000000	518460000
RNA-binding protein 28	RBM28	4	34	34	25	30	25	30	41	85.737	759	0.049266	0.061977	8.5634	10.22	9994300000	3557200000	204490000	692930000	5539700000
Trypsin-3	PRSS3	6	2	2	2	2	2	2	13.5	19.401	178	0.047213	0.057037	0.042609	0.055424	1052000000	509530000	14879000	513220000	14348000
Annexin A2;Annexin;Putative annexin A2-like protein	ANXA2;ANXA2P2	26	14	14	12	8	12	8	53.1	38.604	339	0.04805	0.055264	1.4947	2.0223	1686500000	888920000	404780000	249320000	143480000
